# Supplementary material
Source: PubMed Central journal article supplement (PMC6907074)
Supplement: NIHMS1541141-supplement-2.pdf [file NIHMS1541141-supplement-2.pdf]

## Search-and-replace genome editing without double-strand breaks or donor DNA

Andrew V. Anzalone, Peyton B. Randolph, Jessie R. Davis, Alexander A. Sousa, Luke W. Koblan, Jonathan M. Levy, Peter J. Chen, Christopher Wilson, Gregory A. Newby, Aditya Raguram, and David R. Liu

|                                                                                                                                                                                                        | Page # |
|--------------------------------------------------------------------------------------------------------------------------------------------------------------------------------------------------------|--------|
| <b>Supplementary Discussion</b>                                                                                                                                                                        | 2-5    |
| <b>Supplementary Table 1.</b> Activities of prime editors, Cas9 nuclease, Cas9 H840A nickase, and PE2-dRT at <i>HEK3</i> , <i>HEK4</i> , <i>EMX1</i> , and <i>FANCF</i> on-target and off-target sites | 6      |
| <b>Supplementary Table 2.</b> Sequences of DNA oligonucleotides, pegRNAs and sgRNAs used for <i>in vitro</i> experiments                                                                               | 7      |
| <b>Supplementary Table 3.</b> Sequences of pegRNAs and sgRNAs used in mammalian cell experiments                                                                                                       | 8-16   |
| <b>Supplementary Table 4.</b> Sequences of primers used for mammalian cell genomic DNA amplification and HTS                                                                                           | 17     |
| <b>Supplementary Table 5.</b> Sequences of 100-mer single-stranded DNA oligonucleotide donor templates used in HDR experiments                                                                         | 18     |
| <b>Supplementary Sequences 1.</b> Sequences of yeast dual fluorescent reporter plasmids used in this study                                                                                             | 19-22  |
| <b>Supplementary Sequences 2.</b> DNA sequences of mammalian prime editor plasmids, example pegRNA plasmid, and lentivirus plasmids                                                                    | 23-29  |
| <b>Supplementary Sequences 3.</b> Amino acid sequences of prime editors and M-MLV reverse transcriptase mutants used in this study                                                                     | 30     |
| <b>Supplementary Note 1.</b> FACS gating examples for GFP-positive cell sorting and cell line genotypes                                                                                                | 31-33  |
| <b>Supplementary Note 2.</b> FACS sorting of GFP-positive neuronal nuclei                                                                                                                              | 34     |
| <b>Supplementary Note 3.</b> Method for cloning pegRNAs                                                                                                                                                | 35-37  |
| <b>Supplementary Note 4.</b> Python script for quantifying pegRNA scaffold integration                                                                                                                 | 38-39  |
| <b>Supplementary Figure 1.</b>                                                                                                                                                                         | 40     |
| <b>Supplementary References</b>                                                                                                                                                                        | 41     |

The Supplementary Information file contains:

- Supplementary Discussion that provides additional background and descriptions of the data,
- Supplementary Tables 1-5 that list activity data and short DNA and RNA sequences,
- Supplementary Sequences 1-3 that contain DNA and protein sequences of key constructs,
- Supplementary Notes 1-4 that contain FACS information, cloning methods, and scripts,
- Supplementary Figure 1 that contains original gel image data, and
- Supplementary References.
