# Supplementary material
Source: PubMed Central journal article supplement (PMC6907074)
Supplement: NIHMS1541141-supplement-Sup_info.pdf [file NIHMS1541141-supplement-Sup_info.pdf]

## Search-and-replace genome editing without double-strand breaks or donor DNA

Andrew V. Anzalone, Peyton B. Randolph, Jessie R. Davis, Alexander A. Sousa, Luke W. Koblan, Jonathan M. Levy, Peter J. Chen, Christopher Wilson, Gregory A. Newby, Aditya Raguram, and David R. Liu

|                                                                                                                                                                                                        | Page # |
|--------------------------------------------------------------------------------------------------------------------------------------------------------------------------------------------------------|--------|
| <b>Supplementary Discussion</b>                                                                                                                                                                        | 2-5    |
| <b>Supplementary Table 1.</b> Activities of prime editors, Cas9 nuclease, Cas9 H840A nickase, and PE2-dRT at <i>HEK3</i> , <i>HEK4</i> , <i>EMX1</i> , and <i>FANCF</i> on-target and off-target sites | 6      |
| <b>Supplementary Table 2.</b> Sequences of DNA oligonucleotides, pegRNAs and sgRNAs used for <i>in vitro</i> experiments                                                                               | 7      |
| <b>Supplementary Table 3.</b> Sequences of pegRNAs and sgRNAs used in mammalian cell experiments                                                                                                       | 8-16   |
| <b>Supplementary Table 4.</b> Sequences of primers used for mammalian cell genomic DNA amplification and HTS                                                                                           | 17     |
| <b>Supplementary Table 5.</b> Sequences of 100-mer single-stranded DNA oligonucleotide donor templates used in HDR experiments                                                                         | 18     |
| <b>Supplementary Sequences 1.</b> Sequences of yeast dual fluorescent reporter plasmids used in this study                                                                                             | 19-22  |
| <b>Supplementary Sequences 2.</b> DNA sequences of mammalian prime editor plasmids, example pegRNA plasmid, and lentivirus plasmids                                                                    | 23-29  |
| <b>Supplementary Sequences 3.</b> Amino acid sequences of prime editors and M-MLV reverse transcriptase mutants used in this study                                                                     | 30     |
| <b>Supplementary Note 1.</b> FACS gating examples for GFP-positive cell sorting and cell line genotypes                                                                                                | 31-33  |
| <b>Supplementary Note 2.</b> FACS sorting of GFP-positive neuronal nuclei                                                                                                                              | 34     |
| <b>Supplementary Note 3.</b> Method for cloning pegRNAs                                                                                                                                                | 35-37  |
| <b>Supplementary Note 4.</b> Python script for quantifying pegRNA scaffold integration                                                                                                                 | 38-39  |
| <b>Supplementary Figure 1.</b>                                                                                                                                                                         | 40     |
| <b>Supplementary References</b>                                                                                                                                                                        | 41     |

## Supplementary Discussion

### *Nuclease-based methods for genome editing*

By generating double-stranded DNA breaks (DSBs), nucleases can efficiently introduce mixtures of insertions and deletions (indels) at target DNA sites, and thus are ideally suited for gene or regulatory sequence disruption when mixtures of products are acceptable. In some cases, the resulting DSBs can predictably yield precise end-joining products with high efficiency<sup>15</sup>. Nucleases have also been used to delete target DNA regions by generating two DSBs flanking the sequence to be deleted<sup>47,48</sup>. In addition, DNA segments can be integrated into target sites without relying on homology-directed repair processes by making DSBs at the target site and at the ends of the DNA segments to be inserted<sup>49,50</sup>. These strategies are difficult to implement for achieving precise small insertions or small deletions, since it is difficult to generate closely spaced DSBs simultaneously, and small DNA inserts do not form stable double-stranded duplexes that are required for end-joining under physiological conditions.

Using nucleases to replace larger genomic DNA segments with segments containing precise edits is possible in theory by cutting 5' and 3' of the target region to excise the original DNA segment, cutting 5' and 3' of the edited segment to extract it from a larger DNA sequence such as a vector (or introducing a double-stranded edited DNA segment of precise length), and relying on cellular end-joining to incorporate the edited DNA segment at the target locus. Many byproducts such as incorporation of an inverted original DNA segment, incorporation of an inverted edited DNA segment, insertions of DNA flanking the edited DNA segment (if present), insertions of multiple edited DNA fragments, and indels at all of the above DSBs, however, can result from such an approach, however, and thus editing efficiencies and product purities are expected to be modest<sup>51,52</sup>.

### *Rationale for Cas9-nicked target DNA primer extension*

Upon binding to double-stranded DNA, Cas9:sgRNA complexes<sup>53,54</sup> displace the PAM-containing DNA strand to form a flexible single-stranded DNA R-loop<sup>55,56</sup>. It was previously shown *in vitro* that after cleavage of the PAM-containing strand by Cas9's RuvC nuclease domain, the PAM-distal fragment of the R-loop can be released from otherwise stable Cas9:sgRNA:DNA complexes<sup>57</sup>. We hypothesized that the 3' end of a nicked DNA R-loop could be sufficiently accessible to prime DNA polymerization. Moreover, guide RNA engineering efforts<sup>58-60</sup> and structural studies of Cas9:sgRNA:DNA complexes<sup>27,55,61</sup> suggest that the 5' and 3' termini of the sgRNA may be amenable to extension without disrupting Cas9:sgRNA activity. Thus, we imagined that pegRNAs could be engineered by extending sgRNAs to include two critical components: (1) a primer binding site (PBS) sequence that allows the 3' end of the nicked DNA strand to hybridize to the pegRNA and

act as a primer, and (2) a DNA synthesis template containing the desired edit that would be directly copied into the genomic DNA. Some mobile genetic elements use a related mechanism of target-primed reverse transcription during integration<sup>62</sup>.

### *Complementary strand nicking in PE3*

The PE3 system exploits preferential repair of nicked DNA strands to enhance prime editing efficiencies. We tested nicking the non-edited strand using the Cas9 H840A nickase already present in PE2 and a simple sgRNA to induce the preferential replacement of the non-edited strand by the cell (**Fig. 3a**). At five genomic sites in HEK293T cells, we screened sgRNAs that place a complementary strand nick 14 to 116 bases from the site of the pegRNA-induced nick, either 5' or 3' of the PAM. Nicking the non-edited strand increased the amount of prime editing products in four out of five sites tested (**Fig. 3b**). As expected, at some sites, placement of the non-edited strand nick within 40 bp of the pegRNA-induced nick led to large increases in indel formation up to 22% (**Fig. 3b**), presumably due to the formation of a double-strand break from nicking both strands close together. At other sites, however, nicking as close as 14 bp away from the pegRNA-induced nick produced only 5% indels (**Fig. 3b**), suggesting that locus-dependent factors control conversion of proximal dual nicks into double-strand DNA breaks. At one tested site (*HEK4*), complementary strand nicks either provided no benefit or led to indel levels that surpassed editing efficiency (up to 26%), even when placed at distances >70 bp from the pegRNA-induced nick (**Fig. 3b**), consistent with an unusual propensity of the edited strand at that site to be nicked by the cell, or to be ligated inefficiently.

### *Prime editing compared with adenine base editing*

In addition to comparing prime editing with cytosine base editing (**Extended Data Fig. 6a-c**), we also compared prime editing with adenine base editing at two genomic loci using a current non-nicking adenine base editor (ABEmax<sup>30</sup> with dCas9 instead of a Cas9 nickase, hereafter referred to as ABEdmax) versus PE2, and by the current nicking ABEmax versus PE3. At a site with two target adenines in the base editing window (*HEK3*), ABEs were more efficient than PE2 or PE3 for conversion of A5, but PE3 was more efficient for conversion of A8, which lies at the edge of the ABEmax editing window (**Extended Data Fig. 6d**). When comparing the efficiency of precision edits with only a single converted adenine, PE3 outperformed ABEmax at both A5 and A8 (**Extended Data Fig. 6e**). At *FANCF*, in which only a single A is present within the base editing window, ABEs outperformed their prime editing counterparts in editing efficiency by 1.8- to 2.9-fold (**Extended Data Fig. 6d-e**). At both tested sites, ABEs produced far fewer indels than prime editors (**Extended Data Fig. 6f**). Taken together, these results demonstrate that base editors can result in more efficient

editing than prime editors at optimally positioned target bases, but prime editing can outperform base editing at non-optimally positioned target bases, or when precise edits at targets with multiple editable bases are needed.

#### *Effects of prime editor expression on the cellular transcriptome*

We performed RNA-seq on HEK293T cells expressing PE2, PE2-dRT, or Cas9 H840A nickase together with a *PRNP*-targeting or *HEXA*-targeting pegRNA. Compared to PE2-dRT, PE2 induced  $\geq 2$ -fold upregulation of only 18 RNAs out of >14,000 quantitated RNAs in both *PRNP*-targeting and *HEXA*-targeting samples. Similarly, PE2 induced  $\geq 2$ -fold downregulation of only seven RNAs out of >14,000 quantitated RNAs in both *PRNP*-targeting and *HEXA*-targeting samples. These 25 RNAs lacked evident ontological relationships. In contrast, Cas9 H840A nickase induced upregulation of several heat shock-related genes compared to PE2 or PE2-dRT (**Extended Data Fig. 8d,e,g,h**). These results suggest that active PE2 minimally perturbs the transcriptome relative to Cas9 nickase or a control lacking active RT.

#### *Background on HBB and PRNP pathogenic alleles*

Sickle cell disease is caused by an A•T-to-T•A transversion mutation in *HBB*, resulting in an E6V mutation in beta-globin<sup>63</sup>. Treatment of hematopoietic stem cells *ex vivo* with Cas9 nuclease and a donor DNA template for HDR, followed by enrichment of edited cells, transplantation, and engraftment is a promising potential treatment strategy<sup>64</sup>. This approach still generates many indel-containing byproducts, however, in addition to the correctly edited *HBB* allele, and requires considerable medical infrastructure<sup>64,65</sup>. While base editors generate far fewer indels and have been used *in vivo*, they cannot currently make the T•A-to-A•T transversion mutation needed to directly restore the normal sequence of *HBB*. Therefore, we explored the application of prime editing to correct the sickle cell E6V mutation in *HBB*.

PrP misfolding causes progressive and fatal neurodegenerative prion disease that can arise spontaneously, through inherited dominant mutations in the *PRNP* gene, or through exposure to misfolded PrP<sup>66</sup>. A naturally occurring *PRNP* G127V mutant allele confers resistance to prion disease in humans<sup>35</sup> and mice<sup>36</sup>. We used PE3 to install G127V into the human *PRNP* allele in HEK293T cells, which requires a G•C-to-T•A transversion.

#### *Prime editing compared with HDR in non-HEK293T human cell lines*

In addition to HEK293T cells, we tested prime editing at endogenous genomic sites in three additional human cell lines. In K562 cells, PE3-mediated 3-bp insertion into *HEK3* proceeded with

25% efficiency and 2.8% indels, compared with 17% editing and 72% indels for Cas9-initiated HDR, a 40-fold editing:indel ratio difference favoring PE3 (**Extended Data Fig. 10**). In U2OS cells and HeLa, PE3 performed this 3-bp insertion with 49-fold and 210-fold higher editing:indel ratios, respectively, than Cas9-initiated HDR (**Extended Data Fig. 10**).

**Supplementary Table 1.** Activities of prime editors, Cas9 nuclease, Cas9 H840A nickase, and PE2-dRT at *HEK3*, *HEK4*, *EMX1*, and *FANCF* on-target and off-target sites. PE/PE3 editing is shown as % prime editing alongside % indels (in parentheses). % indels are shown for Cas9, Cas9 H840A nickase (nCas9), and PE2-dRT at the top four previously characterized off-target sites<sup>31,32</sup>. sgRNA and pegRNA sequences can be found in **Supplementary Table 3** under the Figure 5 heading. All values are the average of three independent biological replicates.

| PE           |      | HEK3 (PE3) |        |        |        | HEK4 (PE2) |        |        |        | EMX1 (PE3) |       |       |       | FANCF (PE3) |        |        |        |        |        |        |        |        |
|--------------|------|------------|--------|--------|--------|------------|--------|--------|--------|------------|-------|-------|-------|-------------|--------|--------|--------|--------|--------|--------|--------|--------|
| pegRNA       | Site | ---        | 1      | 2      | 3      | 4          | ---    | 1      | 2      | 3          | 4     | ---   | 1     | 2           | 3      | 4      | ---    | 1      | 2      | 3      | 4      |        |
| On-target    |      | 44.2       | 61.2   | 40.4   | 48.4   | 18.2       | 14.4   | 9.8    | 7.9    | 28.6       | 14.1  | 35.7  | 15.4  | 56.8        | 32.4   | 42.8   | 47.6   |        |        |        |        |        |
|              |      | (11.9)     | (8.8)  | (16.5) | (3.3)  | (0.9)      | (1.8)  | (2.0)  | (2.2)  | (3.5)      | (2.4) | (3.3) | (2.9) | (9.3)       | (16.7) | (13.6) | (12.0) |        |        |        |        |        |
| Off-target 1 |      | <0.1       | <0.1   | <0.1   | <0.1   | <0.1       | 0.4    | <0.1   | 0.4    | <0.1       | <0.1  | <0.1  | <0.1  | <0.1        | 0.6    | <0.1   | <0.1   | <0.1   | <0.1   | <0.1   | <0.1   | <0.1   |
|              |      | (<0.1)     | (<0.1) | (<0.1) | (<0.1) | (<0.1)     | (<0.1) | (<0.1) | (<0.1) | (0.1)      | (0.1) | (0.1) | (0.1) | (0.1)       | (0.1)  | (0.1)  | (0.1)  | (0.1)  | (0.1)  | (0.1)  | (0.1)  | (0.1)  |
| Off-target 2 |      | <0.1       | <0.1   | <0.1   | <0.1   | <0.1       | <0.1   | <0.1   | <0.1   | <0.1       | <0.1  | <0.1  | <0.1  | <0.1        | <0.1   | <0.1   | <0.1   | <0.1   | <0.1   | <0.1   | <0.1   | <0.1   |
|              |      | (<0.1)     | (<0.1) | (<0.1) | (<0.1) | (0.1)      | (0.1)  | (0.1)  | (0.1)  | (<0.1)     | (0.1) | (0.1) | (0.1) | (<0.1)      | (<0.1) | (0.1)  | (<0.1) | (<0.1) | (0.1)  | (<0.1) | (<0.1) | (<0.1) |
| Off-target 3 |      | <0.1       | <0.1   | <0.1   | <0.1   | 0.2        | 6.8    | 19.2   | 7.9    | <0.1       | <0.1  | <0.1  | <0.1  | <0.1        | <0.1   | <0.1   | <0.1   | <0.1   | <0.1   | <0.1   | <0.1   | <0.1   |
|              |      | (<0.1)     | (<0.1) | (<0.1) | (<0.1) | (0.5)      | (1.9)  | (0.5)  | (3.5)  | (0.3)      | (0.3) | (0.3) | (0.3) | (<0.1)      | (<0.1) | (<0.1) | (<0.1) | (<0.1) | (<0.1) | (<0.1) | (<0.1) | (<0.1) |
| Off-target 4 |      | <0.1       | <0.1   | <0.1   | <0.1   | <0.1       | <0.1   | <0.1   | <0.1   | <0.1       | <0.1  | <0.1  | <0.1  | <0.1        | <0.1   | <0.1   | <0.1   | <0.1   | <0.1   | <0.1   | <0.1   | <0.1   |
|              |      | (0.1)      | (0.1)  | (0.1)  | (<0.1) | (<0.1)     | (0.1)  | (0.2)  | (<0.1) | (0.1)      | (0.1) | (0.2) | (0.1) | (<0.1)      | (<0.1) | (<0.1) | (<0.1) | (<0.1) | (<0.1) | (<0.1) | (<0.1) | (<0.1) |

  

| Cas9         |      | HEK3  |      |      |      | HEK4 |       |      |      | EMX1 |      |       |      | FANCF |      |      |       |      |      |      |      |
|--------------|------|-------|------|------|------|------|-------|------|------|------|------|-------|------|-------|------|------|-------|------|------|------|------|
| pegRNA       | Site | sgRNA | 1    | 2    | 3    | 4    | sgRNA | 1    | 2    | 3    | 4    | sgRNA | 1    | 2     | 3    | 4    | sgRNA | 1    | 2    | 3    | 4    |
| On-target    |      | 91.8  | 87.5 | 89.2 | 89.1 | 86.8 | 71.8  | 68.6 | 72.8 | 72.8 | 70.9 | 85.6  | 79.7 | 70.6  | 76.6 | 76.0 | 78.7  | 55.9 | 58.3 | 51.8 | 52.0 |
| Off-target 1 |      | 17.2  | 1.9  | 5.5  | 5.2  | 1.8  | 54.2  | 39.5 | 48.4 | 49.7 | 49.2 | 81.1  | 63.5 | 48.1  | 53.0 | 59.6 | 12.6  | 1.9  | 1.9  | 1.7  | 1.7  |
| Off-target 2 |      | 38.0  | 6.5  | 12.6 | 11.8 | 4.7  | 42.5  | 19.5 | 29.4 | 27.3 | 30.3 | 58.3  | 12.0 | 6.0   | 8.2  | 12.9 | 1.1   | 0.2  | 0.2  | 0.2  | 0.1  |
| Off-target 3 |      | 8.8   | 0.6  | 1.7  | 1.5  | 0.5  | 98.1  | 96.9 | 97.3 | 97.6 | 97.5 | 14.8  | 4.2  | 3.1   | 3.6  | 4.8  | 2.4   | 0.2  | <0.1 | 0.2  | 0.2  |
| Off-target 4 |      | 0.3   | <0.1 | <0.1 | 0.1  | <0.1 | 45.3  | 16.9 | 28.0 | 27.5 | 29.7 | 39.5  | 1.3  | 0.9   | 0.6  | 1.3  | 1.0   | 0.2  | 0.2  | 0.2  | 0.2  |

  

| nCas9        |      | HEK3 |      |      |      | HEK4 |      |      |      | EMX1 |      |      |      | FANCF |      |      |      |      |      |      |      |      |
|--------------|------|------|------|------|------|------|------|------|------|------|------|------|------|-------|------|------|------|------|------|------|------|------|
| pegRNA       | Site | ---  | 1    | 2    | 3    | 4    | ---  | 1    | 2    | 3    | 4    | ---  | 1    | 2     | 3    | 4    | ---  | 1    | 2    | 3    | 4    |      |
| Off-target 1 |      | <0.1 | <0.1 | <0.1 | <0.1 | <0.1 | <0.1 | <0.1 | <0.1 | <0.1 | <0.1 | 0.1  | 0.1  | <0.1  | 0.1  | <0.1 | <0.1 | <0.1 | <0.1 | <0.1 | <0.1 | <0.1 |
| Off-target 2 |      | <0.1 | <0.1 | <0.1 | <0.1 | <0.1 | <0.1 | <0.1 | <0.1 | <0.1 | <0.1 | 0.3  | 0.1  | <0.1  | <0.1 | <0.1 | <0.1 | <0.1 | <0.1 | <0.1 | <0.1 | <0.1 |
| Off-target 3 |      | <0.1 | <0.1 | <0.1 | <0.1 | <0.1 | 0.3  | 0.5  | 0.7  | 0.7  | <0.1 | <0.1 | <0.1 | <0.1  | <0.1 | <0.1 | <0.1 | <0.1 | <0.1 | <0.1 | <0.1 | <0.1 |
| Off-target 4 |      | <0.1 | <0.1 | <0.1 | <0.1 | <0.1 | <0.1 | 0.1  | <0.1 | <0.1 | <0.1 | 1.5  | 0.1  | 0.1   | 0.4  | <0.1 | <0.1 | <0.1 | <0.1 | <0.1 | <0.1 | <0.1 |

  

| PE2-dRT      |      | HEK3 |      |      |      | HEK4 |      |     |      | EMX1 |      |      |      | FANCF |      |      |      |      |      |      |      |      |
|--------------|------|------|------|------|------|------|------|-----|------|------|------|------|------|-------|------|------|------|------|------|------|------|------|
| pegRNA       | Site | ---  | 1    | 2    | 3    | 4    | ---  | 1   | 2    | 3    | 4    | ---  | 1    | 2     | 3    | 4    | ---  | 1    | 2    | 3    | 4    |      |
| Off-target 1 |      | <0.1 | <0.1 | <0.1 | <0.1 | <0.1 | 0.1  | 0.2 | <0.1 | <0.1 | <0.1 | 0.1  | 0.1  | 0.1   | 0.1  | <0.1 | <0.1 | <0.1 | <0.1 | <0.1 | <0.1 | <0.1 |
| Off-target 2 |      | <0.1 | <0.1 | <0.1 | <0.1 | <0.1 | <0.1 | 0.1 | <0.1 | <0.1 | <0.1 | <0.1 | 0.3  | <0.1  | <0.1 | <0.1 | <0.1 | <0.1 | <0.1 | <0.1 | <0.1 | <0.1 |
| Off-target 3 |      | <0.1 | <0.1 | <0.1 | <0.1 | <0.1 | <0.1 | 0.1 | 1.4  | 0.9  | <0.1 | <0.1 | <0.1 | <0.1  | <0.1 | <0.1 | <0.1 | <0.1 | <0.1 | <0.1 | <0.1 | <0.1 |
| Off-target 4 |      | <0.1 | <0.1 | <0.1 | <0.1 | <0.1 | 0.1  | 0.1 | 0.1  | 0.2  | 0.9  | 0.1  | 0.1  | 0.1   | 0.2  | <0.1 | <0.1 | <0.1 | <0.1 | <0.1 | <0.1 | <0.1 |

**Supplementary Table 2.** Sequences of DNA oligonucleotides, pegRNAs, and sgRNAs used for *in vitro* experiments.

| Oligonucleotide | Sequence                                                 |
|-----------------|----------------------------------------------------------|
| AVA023          | 5Cy5-CCTGGGTCAATCCTTGGGGCCAGACTGAGCACG                   |
| AVA024          | 5Cy5-CCTGGGTCAATCCTTGGGGCCAGACTGAGCACGTGATGGCAGAGGAAAGG  |
| AVA025          | 5Phos-CCTTTCCTCTGCCATCACGTGCTCAGTCTGGGCCCAAGGATTGACCCAGG |
| AVA026          | 5Phos-TGATGGCAGAGGAAAGG                                  |
| AVA037          | GCAGGCTTTAAAGGAACCAATTC                                  |
| AVA110          | GCAGGCTTTAAAGGAACCAATTCCTGGGTCAATCCTTGGGGC               |
| AVA122          | CTCTGGAGGATCTAGCGGAG                                     |
| AVA134          | CTCTGGAGGATCTAGCGGAGTTTTTTTTTTTTTTTTTTTTTTTT             |
| AVA135          | CTCTGGAGGATCTAGCGGAGCCCCCCCCCCCC                         |

**5'-extended pegRNAs**

| pegRNA           | spacer sequence     | 5' extension sequence                     | Linker length (nt) | PBS length (nt) | RT template length (nt) |
|------------------|---------------------|-------------------------------------------|--------------------|-----------------|-------------------------|
| pegRNA 1         | GGCCAGACTGAGCACGTGA | GGCTAACCGTGCCATTTGATCAGGTCA               | 15                 | 5               | 7                       |
| pegRNA 2         | GGCCAGACTGAGCACGTGA | GGCTAACCGTGCAAATTAACAACTAA                | 15                 | 5               | 7                       |
| pegRNA 3         | GGCCAGACTGAGCACGTGA | GGCCATCTCGTGCAAATTAACAACTAA               | 15                 | 5               | 8                       |
| pegRNA 4         | GGCCAGACTGAGCACGTGA | GGTCCTCTGCCATCTCGTGCAAATTAACAACTAA        | 15                 | 5               | 15                      |
| pegRNA 5         | GGCCAGACTGAGCACGTGA | GGCTTCCTTTCCTCTGCCATCTCGTGCAAATTAACAACTAA | 15                 | 5               | 22                      |
| 5'-pegRNA_RT_7_a | GGCCAGACTGAGCACGTGA | GGCTAACCGTGCCATTTGATCAGGTCA               | 15                 | 5               | 7                       |
| 5'-pegRNA_RT_7_b | GGCCAGACTGAGCACGTGA | GGCTAACCGTGCAAATTAACAACTAA                | 15                 | 5               | 7                       |
| 5'-pegRNA_RT_8   | GGCCAGACTGAGCACGTGA | GGCCATCTCGTGCAAATTAACAACTAA               | 15                 | 5               | 8                       |
| 5'-pegRNA_RT_15  | GGCCAGACTGAGCACGTGA | GGTCCTCTGCCATCTCGTGCAAATTAACAACTAA        | 15                 | 5               | 15                      |
| 5'-pegRNA_RT_22  | GGCCAGACTGAGCACGTGA | GGCTTCCTTTCCTCTGCCATCTCGTGCAAATTAACAACTAA | 15                 | 5               | 22                      |

**3'-extended pegRNAs**

| pegRNA                 | spacer sequence     | 3' extension sequence | PBS length (nt) | RT template length (nt) |
|------------------------|---------------------|-----------------------|-----------------|-------------------------|
| 3'-pegRNA_10           | GGCCAGACTGAGCACGTGA | TCTGCCATCTCGTGCTC     | 7               | 10                      |
| 3'-pegRNA_yeast_TtoA   | GGCCAGACTGAGCACGTGA | TCTGCCATCTCGTGCTC     | 7               | 10                      |
| 3'-pegRNA_yeast_+1Ains | GGCCAGACTGAGCACGTGA | TCTGCCATCATCGTGCTC    | 7               | 11                      |
| 3'-pegRNA_yeast_+1Tdel | GGCCAGACTGAGCACGTGA | TCTGCCATCCGTGCTC      | 7               | 9                       |

**Supplementary Table 3.** Sequences of pegRNAs and sgRNAs used in mammalian cell experiments. All sequences are shown in 5' to 3' orientation. pegRNAs are a concatenation of the spacer sequence, the sgRNA scaffold, and the 3' extension (contains PBS and RT template). All pegRNAs used sgRNA scaffold 1 unless indicated with a \* to denote the use of sgRNA scaffold 2.

**sgRNA scaffold 1**

GTTTTAGAGCTAGAAATAGCAAGTTAAATAAGGCTAGTCCGTTATCAACTTGAAAAAGTGGACCGAGTCGGTCC

**sgRNA scaffold 2** (contains two substitutions with respect to scaffold 1, inverting the second to last bp of the terminal hairpin)

GTTTTAGAGCTAGAAATAGCAAGTTAAATAAGGCTAGTCCGTTATCAACTTGAAAAAGTGGACCGAGTCGGTCC

Figure 2 and Extended Data Figure 3 sequences:

| pegRNA           | spacer sequence       | 3' extension                       | PBS length (nt) | RT template length (nt) |
|------------------|-----------------------|------------------------------------|-----------------|-------------------------|
| *HEK3_2a_8       | GGCCAGACTGAGCACGTGA   | TC TGCCATCTCGTGCTCA                | 8               | 10                      |
| *HEK3_2a_9       | GGCCAGACTGAGCACGTGA   | TC TGCCATCTCGTGCTCAG               | 9               | 10                      |
| *HEK3_2a_10      | GGCCAGACTGAGCACGTGA   | TC TGCCATCTCGTGCTCAGT              | 10              | 10                      |
| *HEK3_2a_11      | GGCCAGACTGAGCACGTGA   | TC TGCCATCTCGTGCTCAGTC             | 11              | 10                      |
| *HEK3_2a_12      | GGCCAGACTGAGCACGTGA   | TC TGCCATCTCGTGCTCAGTCT            | 12              | 10                      |
| *HEK3_2a_13      | GGCCAGACTGAGCACGTGA   | TC TGCCATCTCGTGCTCAGTCTG           | 13              | 10                      |
| *HEK3_2a_14      | GGCCAGACTGAGCACGTGA   | TC TGCCATCTCGTGCTCAGTCTGG          | 14              | 10                      |
| *HEK3_2a_15      | GGCCAGACTGAGCACGTGA   | TC TGCCATCTCGTGCTCAGTCTGGG         | 15              | 10                      |
| *HEK3_2a_16      | GGCCAGACTGAGCACGTGA   | TC TGCCATCTCGTGCTCAGTCTGGGC        | 16              | 10                      |
| *HEK3_2a_17      | GGCCAGACTGAGCACGTGA   | TC TGCCATCTCGTGCTCAGTCTGGGCC       | 17              | 10                      |
| EMX1_2a_9        | GAGTCCGAGCAGAAGAAGAA  | ATGGGAGCACTTCTTCTTCTGCT            | 9               | 13                      |
| EMX1_2a_10       | GAGTCCGAGCAGAAGAAGAA  | ATGGGAGCACTTCTTCTTCTGCT            | 10              | 13                      |
| EMX1_2a_11       | GAGTCCGAGCAGAAGAAGAA  | ATGGGAGCACTTCTTCTTCTGCTC           | 11              | 13                      |
| EMX1_2a_12       | GAGTCCGAGCAGAAGAAGAA  | ATGGGAGCACTTCTTCTTCTGCTCG          | 12              | 13                      |
| EMX1_2a_13       | GAGTCCGAGCAGAAGAAGAA  | ATGGGAGCACTTCTTCTTCTGCTCGG         | 13              | 13                      |
| EMX1_2a_14       | GAGTCCGAGCAGAAGAAGAA  | ATGGGAGCACTTCTTCTTCTGCTCGGA        | 14              | 13                      |
| EMX1_2a_15       | GAGTCCGAGCAGAAGAAGAA  | ATGGGAGCACTTCTTCTTCTGCTCGGAC       | 15              | 13                      |
| EMX1_2a_16       | GAGTCCGAGCAGAAGAAGAA  | ATGGGAGCACTTCTTCTTCTGCTCGGACT      | 16              | 13                      |
| EMX1_2a_17       | GAGTCCGAGCAGAAGAAGAA  | ATGGGAGCACTTCTTCTTCTGCTCGGACTC     | 17              | 13                      |
| FANCF_2a_8       | GGAAATCCCTTCTGCAGCACC | GGAAAAGCGATCAAGGTGCTGCAGA          | 8               | 17                      |
| FANCF_2a_9       | GGAAATCCCTTCTGCAGCACC | GGAAAAGCGATCAAGGTGCTGCAGAA         | 9               | 17                      |
| FANCF_2a_10      | GGAAATCCCTTCTGCAGCACC | GGAAAAGCGATCAAGGTGCTGCAGAAG        | 10              | 17                      |
| FANCF_2a_11      | GGAAATCCCTTCTGCAGCACC | GGAAAAGCGATCAAGGTGCTGCAGAAGG       | 11              | 17                      |
| FANCF_2a_12      | GGAAATCCCTTCTGCAGCACC | GGAAAAGCGATCAAGGTGCTGCAGAAGGG      | 12              | 17                      |
| FANCF_2a_13      | GGAAATCCCTTCTGCAGCACC | GGAAAAGCGATCAAGGTGCTGCAGAAGGGA     | 13              | 17                      |
| FANCF_2a_14      | GGAAATCCCTTCTGCAGCACC | GGAAAAGCGATCAAGGTGCTGCAGAAGGGAT    | 14              | 17                      |
| FANCF_2a_15      | GGAAATCCCTTCTGCAGCACC | GGAAAAGCGATCAAGGTGCTGCAGAAGGGATT   | 15              | 17                      |
| FANCF_2a_16      | GGAAATCCCTTCTGCAGCACC | GGAAAAGCGATCAAGGTGCTGCAGAAGGGATTCC | 16              | 17                      |
| FANCF_2a_17      | GGAAATCCCTTCTGCAGCACC | GGAAAAGCGATCAAGGTGCTGCAGAAGGGATTCC | 17              | 17                      |
| RNF2_2a_9        | GTCATCTTAGTCATTACCTG  | GAACACCTCATGTAATGACT               | 9               | 11                      |
| RNF2_2a_10       | GTCATCTTAGTCATTACCTG  | GAACACCTCATGTAATGACTA              | 10              | 11                      |
| RNF2_2a_11       | GTCATCTTAGTCATTACCTG  | GAACACCTCATGTAATGACTAA             | 11              | 11                      |
| RNF2_2a_12       | GTCATCTTAGTCATTACCTG  | GAACACCTCATGTAATGACTAAG            | 12              | 11                      |
| RNF2_2a_13       | GTCATCTTAGTCATTACCTG  | GAACACCTCATGTAATGACTAAGA           | 13              | 11                      |
| RNF2_2a_14       | GTCATCTTAGTCATTACCTG  | GAACACCTCATGTAATGACTAAGAT          | 14              | 11                      |
| RNF2_2a_15       | GTCATCTTAGTCATTACCTG  | GAACACCTCATGTAATGACTAAGATG         | 15              | 11                      |
| RNF2_2a_16       | GTCATCTTAGTCATTACCTG  | GAACACCTCATGTAATGACTAAGATGA        | 16              | 11                      |
| RNF2_2a_17       | GTCATCTTAGTCATTACCTG  | GAACACCTCATGTAATGACTAAGATGAC       | 17              | 11                      |
| HEK4_2a_7        | GGCACTGCGGCTGGAGGTGG  | GCTTTAACCCCAACCTCCAG               | 7               | 13                      |
| HEK4_2a_8        | GGCACTGCGGCTGGAGGTGG  | GCTTTAACCCCAACCTCCAGC              | 8               | 13                      |
| HEK4_2a_9        | GGCACTGCGGCTGGAGGTGG  | GCTTTAACCCCAACCTCCAGCC             | 9               | 13                      |
| HEK4_2a_10       | GGCACTGCGGCTGGAGGTGG  | GCTTTAACCCCAACCTCCAGCCG            | 10              | 13                      |
| HEK4_2a_11       | GGCACTGCGGCTGGAGGTGG  | GCTTTAACCCCAACCTCCAGCCGC           | 11              | 13                      |
| HEK4_2a_12       | GGCACTGCGGCTGGAGGTGG  | GCTTTAACCCCAACCTCCAGCCGCA          | 12              | 13                      |
| HEK4_2a_13       | GGCACTGCGGCTGGAGGTGG  | GCTTTAACCCCAACCTCCAGCCGCAG         | 13              | 13                      |
| HEK4_2a_14       | GGCACTGCGGCTGGAGGTGG  | GCTTTAACCCCAACCTCCAGCCGCAGT        | 14              | 13                      |
| HEK4_2a_15       | GGCACTGCGGCTGGAGGTGG  | GCTTTAACCCCAACCTCCAGCCGCAGTG       | 15              | 13                      |
| *HEK3_2a_1Tdel   | GGCCAGACTGAGCACGTGA   | TC TGCCATCCGTGCTCAGTCTG            | 13              | 10                      |
| *HEK3_2a_1Ains   | GGCCAGACTGAGCACGTGA   | TC TGCCATCATCGTCTCAGTCTG           | 13              | 10                      |
| *HEK3_2a_1CTTins | GGCCAGACTGAGCACGTGA   | TC TGCCATCAAAGCGTCTCAGTCTG         | 13              | 10                      |
| *HEK3_2b_10      | GGCCAGACTGAGCACGTGA   | TC TGCCATCTCGTGCTCAGTCTG           | 13              | 10                      |
| *HEK3_2b_11      | GGCCAGACTGAGCACGTGA   | CTCTGCCATCTCGTGCTCAGTCTG           | 13              | 11                      |
| *HEK3_2b_12      | GGCCAGACTGAGCACGTGA   | CTCTGCCATCTCGTGCTCAGTCTG           | 13              | 12                      |
| *HEK3_2b_13      | GGCCAGACTGAGCACGTGA   | TCCTCTGCCATCTCGTGCTCAGTCTG         | 13              | 13                      |
| *HEK3_2b_14      | GGCCAGACTGAGCACGTGA   | TTCTCTGCCATCTCGTGCTCAGTCTG         | 13              | 14                      |
| *HEK3_2b_15      | GGCCAGACTGAGCACGTGA   | TTTCTCTGCCATCTCGTGCTCAGTCTG        | 13              | 15                      |
| *HEK3_2b_16      | GGCCAGACTGAGCACGTGA   | CTTTCTCTGCCATCTCGTGCTCAGTCTG       | 13              | 16                      |
| *HEK3_2b_17      | GGCCAGACTGAGCACGTGA   | CCTTCTCTGCCATCTCGTGCTCAGTCTG       | 13              | 17                      |
| *HEK3_2b_18      | GGCCAGACTGAGCACGTGA   | TCCTTCTCTGCCATCTCGTGCTCAGTCTG      | 13              | 18                      |



|             |                       |                                     |    |    |
|-------------|-----------------------|-------------------------------------|----|----|
| *HEK3_2b_19 | GGCCAGACTGAGCACGTGA   | TTCTTTTCTCTGCCATCTCGTCTCAGTCTG      | 13 | 19 |
| *HEK3_2b_20 | GGCCAGACTGAGCACGTGA   | CTTCCTTTCTCTGCCATCTCGTCTCAGTCTG     | 13 | 20 |
| EMX1_2b_10  | GAGTCCGAGCAGAAGAAGAA  | GGAGCCCTTGTCTTCTGCTCGG              | 13 | 10 |
| EMX1_2b_11  | GAGTCCGAGCAGAAGAAGAA  | GGGAGCCCTTGTCTTCTGCTCGG             | 13 | 11 |
| EMX1_2b_12  | GAGTCCGAGCAGAAGAAGAA  | TGGGAGCCCTTGTCTTCTGCTCGG            | 13 | 12 |
| EMX1_2b_13  | GAGTCCGAGCAGAAGAAGAA  | ATGGGAGCCCTTGTCTTCTGCTCGG           | 13 | 13 |
| EMX1_2b_14  | GAGTCCGAGCAGAAGAAGAA  | GATGGGAGCCCTTGTCTTCTGCTCGG          | 13 | 14 |
| EMX1_2b_15  | GAGTCCGAGCAGAAGAAGAA  | TGATGGGAGCCCTTGTCTTCTGCTCGG         | 13 | 15 |
| EMX1_2b_16  | GAGTCCGAGCAGAAGAAGAA  | GTGATGGGAGCCCTTGTCTTCTGCTCGG        | 13 | 16 |
| EMX1_2b_17  | GAGTCCGAGCAGAAGAAGAA  | TGTGATGGGAGCCCTTGTCTTCTGCTCGG       | 13 | 17 |
| EMX1_2b_18  | GAGTCCGAGCAGAAGAAGAA  | ATGTGATGGGAGCCCTTGTCTTCTGCTCGG      | 13 | 18 |
| EMX1_2b_19  | GAGTCCGAGCAGAAGAAGAA  | GATGTGATGGGAGCCCTTGTCTTCTGCTCGG     | 13 | 19 |
| EMX1_2b_20  | GAGTCCGAGCAGAAGAAGAA  | TGATGTGATGGGAGCCCTTGTCTTCTGCTCGG    | 13 | 20 |
| FANCF_2b_10 | GGAAATCCCTTCTGCAGCACC | CGATCAAGGTGCTGCAGAAGGGA             | 13 | 10 |
| FANCF_2b_11 | GGAAATCCCTTCTGCAGCACC | GCGATCAAGGTGCTGCAGAAGGGA            | 13 | 11 |
| FANCF_2b_12 | GGAAATCCCTTCTGCAGCACC | AGCGATCAAGGTGCTGCAGAAGGGA           | 13 | 12 |
| FANCF_2b_13 | GGAAATCCCTTCTGCAGCACC | AAGCGATCAAGGTGCTGCAGAAGGGA          | 13 | 13 |
| FANCF_2b_14 | GGAAATCCCTTCTGCAGCACC | AAAGCGATCAAGGTGCTGCAGAAGGGA         | 13 | 14 |
| FANCF_2b_15 | GGAAATCCCTTCTGCAGCACC | AAAAGCGATCAAGGTGCTGCAGAAGGGA        | 13 | 15 |
| FANCF_2b_16 | GGAAATCCCTTCTGCAGCACC | AAAAAGCGATCAAGGTGCTGCAGAAGGGA       | 13 | 16 |
| FANCF_2b_17 | GGAAATCCCTTCTGCAGCACC | GGAAAAGCGATCAAGGTGCTGCAGAAGGGA      | 13 | 17 |
| FANCF_2b_18 | GGAAATCCCTTCTGCAGCACC | CGGAAAAGCGATCAAGGTGCTGCAGAAGGGA     | 13 | 18 |
| FANCF_2b_19 | GGAAATCCCTTCTGCAGCACC | TCGGAAAAGCGATCAAGGTGCTGCAGAAGGGA    | 13 | 19 |
| FANCF_2b_20 | GGAAATCCCTTCTGCAGCACC | CTCGGAAAAGCGATCAAGGTGCTGCAGAAGGGA   | 13 | 20 |
| RNF2_2b_10  | GTCATCTTAGTCATTACCTG  | AACACCTCATGTAATGACTAAGATG           | 15 | 10 |
| RNF2_2b_11  | GTCATCTTAGTCATTACCTG  | GAACACCTCATGTAATGACTAAGATG          | 15 | 11 |
| RNF2_2b_12  | GTCATCTTAGTCATTACCTG  | CGAACACCTCATGTAATGACTAAGATG         | 15 | 12 |
| RNF2_2b_13  | GTCATCTTAGTCATTACCTG  | ACGAACACCTCATGTAATGACTAAGATG        | 15 | 13 |
| RNF2_2b_14  | GTCATCTTAGTCATTACCTG  | AACGAACACCTCATGTAATGACTAAGATG       | 15 | 14 |
| RNF2_2b_15  | GTCATCTTAGTCATTACCTG  | CAACGAACACCTCATGTAATGACTAAGATG      | 15 | 15 |
| RNF2_2b_16  | GTCATCTTAGTCATTACCTG  | ACAACGAACACCTCATGTAATGACTAAGATG     | 15 | 16 |
| RNF2_2b_17  | GTCATCTTAGTCATTACCTG  | TACAACGAACACCTCATGTAATGACTAAGATG    | 15 | 17 |
| RNF2_2b_18  | GTCATCTTAGTCATTACCTG  | TTACAACGAACACCTCATGTAATGACTAAGATG   | 15 | 18 |
| RNF2_2b_19  | GTCATCTTAGTCATTACCTG  | GTTACAACGAACACCTCATGTAATGACTAAGATG  | 15 | 19 |
| RNF2_2b_20  | GTCATCTTAGTCATTACCTG  | AGTTACAACGAACACCTCATGTAATGACTAAGATG | 15 | 20 |
| HEK4_2b_7   | GGCACTGCGGCTGGAGGTGG  | ACCCCAACCTCCAGCCGC                  | 11 | 7  |
| HEK4_2b_8   | GGCACTGCGGCTGGAGGTGG  | AACCCCAACCTCCAGCCGC                 | 11 | 8  |
| HEK4_2b_9   | GGCACTGCGGCTGGAGGTGG  | TAACCCCAACCTCCAGCCGC                | 11 | 9  |
| HEK4_2b_10  | GGCACTGCGGCTGGAGGTGG  | TTAACCCCAACCTCCAGCCGC               | 11 | 10 |
| HEK4_2b_11  | GGCACTGCGGCTGGAGGTGG  | TTTAACCCCAACCTCCAGCCGC              | 11 | 11 |
| HEK4_2b_12  | GGCACTGCGGCTGGAGGTGG  | CTTTAACCCCAACCTCCAGCCGC             | 11 | 12 |
| HEK4_2b_13  | GGCACTGCGGCTGGAGGTGG  | GCTTTAACCCCAACCTCCAGCCGC            | 11 | 13 |
| HEK4_2b_14  | GGCACTGCGGCTGGAGGTGG  | CGCTTTAACCCCAACCTCCAGCCGC           | 11 | 14 |
| HEK4_2b_15  | GGCACTGCGGCTGGAGGTGG  | CCGCTTTAACCCCAACCTCCAGCCGC          | 11 | 15 |
| HEK4_2b_16  | GGCACTGCGGCTGGAGGTGG  | TCCGCTTTAACCCCAACCTCCAGCCGC         | 11 | 16 |
| HEK4_2b_17  | GGCACTGCGGCTGGAGGTGG  | CTCCGCTTTAACCCCAACCTCCAGCCGC        | 11 | 17 |
| HEK4_2b_18  | GGCACTGCGGCTGGAGGTGG  | CTCCGCTTTAACCCCAACCTCCAGCCGC        | 11 | 18 |
| HEK4_2b_19  | GGCACTGCGGCTGGAGGTGG  | CTCCGCTTTAACCCCAACCTCCAGCCGC        | 11 | 19 |

Figure 3 sequences:

| pegRNA         | spacer sequence       | 3' extension                     | PBS length (nt) | RT template length (nt) |
|----------------|-----------------------|----------------------------------|-----------------|-------------------------|
| RNF2_3b        | GTCATCTTAGTCATTACCTG  | AACGAACACCTCATGTAATGACTAAGATG    | 15              | 14                      |
| EMX1_3b        | GAGTCCGAGCAGAAGAAGAA  | ATGGGAGCACTTCTTCTTCTGCTCGGAC     | 15              | 13                      |
| FANCF_3b       | GGAAATCCCTTCTGCAGCACC | GGAAAAGCGATCAAGGTGCTGCAGAAGGGATT | 15              | 17                      |
| *HEK3_3b       | GGCCAGACTGAGCACGTGA   | TCTGCCATGACGTGCTCAGTCTG          | 13              | 10                      |
| HEK4_3b        | GGCACTGCGGCTGGAGGTGG  | TTAACCCCAACCTCCAGCCGC            | 9               | 10                      |
| RNF2_3c_4AtoC  | GTCATCTTAGTCATTACCTG  | AACGAACACCCGAGGTAATGACTAAGATG    | 15              | 14                      |
| RNF2_3c_4AtoG  | GTCATCTTAGTCATTACCTG  | AACGAACACCCGAGGTAATGACTAAGATG    | 15              | 14                      |
| FANCF_3c_5GtoT | GGAAATCCCTTCTGCAGCACC | GGAAAAGCGATCAAGGTGCTGCAGAAGGGA   | 13              | 17                      |
| FANCF_3c_7AtoC | GGAAATCCCTTCTGCAGCACC | GGAAAAGCGAGCCAGGTGCTGCAGAAGGGAT  | 14              | 17                      |

  

| nicking sgRNA | spacer sequence         |
|---------------|-------------------------|
| RNF2_3b_+41   | GTCAACCATTAAAGCAAAAACAT |
| RNF2_3b_+67   | GTCTCAGGCTGTGCAGACAAA   |
| EMX1_3b_-116  | GGGGCACAGATGAGAAAACCT   |
| EMX1_3b_-57   | GCCGTTTGTACTTTGTCTCTC   |
| EMX1_3b_+14   | GCGCCACCGGTTGATGTGAT    |
| EMX1_3b_+27   | GCTTCGTGGCAATGCGCCAC    |
| EMX1_3b_+53   | GACATCGATGTCTCTCCCAT    |
| EMX1_3b_+80   | GTGGTTGCCACCCCTAGTCAT   |
| FANCF_3b_-78  | GCGACTCTCTGCGTACTGAT    |
| FANCF_3b_-50  | GCCCTACTTCCGCTTTTACCT   |
| FANCF_3b_-27  | GGATTCCATGAGGTGCGCGA    |
| FANCF_3b_-17  | GCTGCAGAAGGGATTCCATG    |
| FANCF_3b_+21  | GCTTGAGACCCGACAGAAGCT   |

```

FANCF_3b_+48      GGGGTCCCAGGTGCTGACGT
HEK3_3b_-108     GCAGAAATAGACTAATTGCA
HEK3_3b_-38      GGATTGACCCAGGCCAGGGC
HEK3_3b_+26      GACGCCCTCTGGAGGAAGCA
HEK3_3b_+37      GCTGTCTTGGACGCCCTC
HEK3_3b_+63      GCACATACTAGCCCCGTCT
HEK3_3b_+90      GTCAACCAGTATCCCCGGTGC
HEK4_3b_-95      GTCCCTTCCTTCCACCCAGCC
HEK4_3b_-52      GCCCTGCCTGTATCTGCTT
HEK4_3b_-26      GCAGTGCCACCGGGGGCCCG
HEK4_3b_+52      GCGGGGGCTCAGAGAGGGCA
HEK4_3b_+74      GAGACACACACACAGGCTTG
RNF2_3c_+41      GTCAACCATTAAAGCAAAACAT
RNF2_3c_4AtoC_+5  GTGAGTTACAACGAACACCGC
RNF2_3c_4AtoG_+5  GTGAGTTACAACGAACACCCC
FANCF_3c_+48     GGGGTCCCAGGTGCTGACGT
FANCF_3c_5GtoT_+7  GAAGCTCGAAAAGCGATCA
FANCF_3c_7AtoC_+7  GAAGCTCGAAAAGCGAGCC

```

Figure 4 sequences:

| pegRNA         | spacer sequence      | 3' extension                           | PBS length (nt) | RT template length (nt) |
|----------------|----------------------|----------------------------------------|-----------------|-------------------------|
| *HEK3_4a_1TtoA | GGCCAGACTGAGCACGTGA  | TCTGCCATCTCGTGCTCAGTCTG                | 13              | 10                      |
| *HEK3_4a_1TtoC | GGCCAGACTGAGCACGTGA  | TCTGCCATCGCGTGCTCAGTCTG                | 13              | 10                      |
| *HEK3_4a_1TtoG | GGCCAGACTGAGCACGTGA  | TCTGCCATCCCGTGCTCAGTCTG                | 13              | 10                      |
| *HEK3_4a_2GtoA | GGCCAGACTGAGCACGTGA  | TCTGCCATTACGTGCTCAGTCTG                | 13              | 10                      |
| *HEK3_4a_2GtoC | GGCCAGACTGAGCACGTGA  | TCTGCCATGACGTGCTCAGTCTG                | 13              | 10                      |
| *HEK3_4a_2GtoT | GGCCAGACTGAGCACGTGA  | TCTGCCATAACGTGCTCAGTCTG                | 13              | 10                      |
| *HEK3_4a_3AtoC | GGCCAGACTGAGCACGTGA  | TCTGCCAGCACGTGCTCAGTCTG                | 13              | 10                      |
| *HEK3_4a_3AtoG | GGCCAGACTGAGCACGTGA  | TCTGCCACCACGTGCTCAGTCTG                | 13              | 10                      |
| *HEK3_4a_3AtoT | GGCCAGACTGAGCACGTGA  | TCTGCCAACACGTGCTCAGTCTG                | 13              | 10                      |
| *HEK3_4a_4TtoA | GGCCAGACTGAGCACGTGA  | TCTGCCTTCAGTGCTCAGTCTG                 | 13              | 10                      |
| *HEK3_4a_4TtoC | GGCCAGACTGAGCACGTGA  | TCTGCCGTACGTGCTCAGTCTG                 | 13              | 10                      |
| *HEK3_4a_4TtoG | GGCCAGACTGAGCACGTGA  | TCTGCCCTCAGTGCTCAGTCTG                 | 13              | 10                      |
| *HEK3_4a_5GtoA | GGCCAGACTGAGCACGTGA  | TCTGTATACGTGCTCAGTCTG                  | 13              | 10                      |
| *HEK3_4a_5GtoC | GGCCAGACTGAGCACGTGA  | TCTGCGATACGTGCTCAGTCTG                 | 13              | 10                      |
| *HEK3_4a_5GtoT | GGCCAGACTGAGCACGTGA  | TCTGCAATCACGTGCTCAGTCTG                | 13              | 10                      |
| *HEK3_4a_6GtoA | GGCCAGACTGAGCACGTGA  | TCTGTATACGTGCTCAGTCTG                  | 13              | 10                      |
| *HEK3_4a_6GtoC | GGCCAGACTGAGCACGTGA  | TCTGGCATCACGTGCTCAGTCTG                | 13              | 10                      |
| *HEK3_4a_6GtoT | GGCCAGACTGAGCACGTGA  | TCTGACATCACGTGCTCAGTCTG                | 13              | 10                      |
| *HEK3_4a_7CtoA | GGCCAGACTGAGCACGTGA  | TCTTCCATCACGTGCTCAGTCTG                | 13              | 10                      |
| *HEK3_4a_7CtoG | GGCCAGACTGAGCACGTGA  | TCTCCCATCACGTGCTCAGTCTG                | 13              | 10                      |
| *HEK3_4a_7CtoT | GGCCAGACTGAGCACGTGA  | TCTACCATCACGTGCTCAGTCTG                | 13              | 10                      |
| *HEK3_4a_8AtoC | GGCCAGACTGAGCACGTGA  | TCGGCCATCACGTGCTCAGTCTG                | 13              | 10                      |
| *HEK3_4a_8AtoG | GGCCAGACTGAGCACGTGA  | TCCGCCATCACGTGCTCAGTCTG                | 13              | 10                      |
| *HEK3_4a_8AtoT | GGCCAGACTGAGCACGTGA  | TCAGCCATCACGTGCTCAGTCTG                | 13              | 10                      |
| HEK3_4b_1TtoA  | GGCCAGACTGAGCACGTGA  | TGGAGGAAGCAGGGCTTCCCTTCTGCTGCTCAGTCTG  | 13              | 34                      |
| HEK3_4b_12GtoC | GGCCAGACTGAGCACGTGA  | TGGAGGAAGCAGGGCTTCCCTTCTGCTGCTCAGTCTG  | 13              | 34                      |
| HEK3_4b_14AtoT | GGCCAGACTGAGCACGTGA  | TGGAGGAAGCAGGGCTTCCCTATCTGCTGCTCAGTCTG | 13              | 34                      |
| HEK3_4b_17GtoC | GGCCAGACTGAGCACGTGA  | TGGAGGAAGCAGGGCTTCCCTTCTGCTGCTCAGTCTG  | 13              | 34                      |
| HEK3_4b_20GtoC | GGCCAGACTGAGCACGTGA  | TGGAGGAAGCAGGGCTTCCCTTCTGCTGCTCAGTCTG  | 13              | 34                      |
| HEK3_4b_23CtoG | GGCCAGACTGAGCACGTGA  | TGGAGGAAGCAGGGCTTCCCTTCTGCTGCTCAGTCTG  | 13              | 34                      |
| HEK3_4b_24TtoA | GGCCAGACTGAGCACGTGA  | TGGAGGAAGCTGGGCTTCCCTTCTGCTGCTCAGTCTG  | 13              | 34                      |
| HEK3_4b_26CtoG | GGCCAGACTGAGCACGTGA  | TGGAGGAACCAGGGCTTCCCTTCTGCTGCTCAGTCTG  | 13              | 34                      |
| HEK3_4b_30CtoG | GGCCAGACTGAGCACGTGA  | TGGAGGAAGCAGGGCTTCCCTTCTGCTGCTCAGTCTG  | 13              | 34                      |
| HEK3_4b_33CtoG | GGCCAGACTGAGCACGTGA  | TCGAGGAAGCAGGGCTTCCCTTCTGCTGCTCAGTCTG  | 13              | 34                      |
| RNF2_4c_1CtoA  | GTCATCTTAGTCATTACCTG | AACGAACACCTCATGTAATGACTAAGATG          | 15              | 14                      |
| RNF2_4c_1CtoG  | GTCATCTTAGTCATTACCTG | AACGAACACCTCACGTAATGACTAAGATG          | 15              | 14                      |
| RNF2_4c_1CtoT  | GTCATCTTAGTCATTACCTG | AACGAACACCTCAAGTAATGACTAAGATG          | 15              | 14                      |
| RNF2_4c_2TtoA  | GTCATCTTAGTCATTACCTG | AACGAACACCTCTGGTAATGACTAAGATG          | 15              | 14                      |
| RNF2_4c_2TtoG  | GTCATCTTAGTCATTACCTG | AACGAACACCTCCGGTAATGACTAAGATG          | 15              | 14                      |
| RNF2_4c_3GtoC  | GTCATCTTAGTCATTACCTG | AACGAACACCTGAGGTAATGACTAAGATG          | 15              | 14                      |
| RNF2_4c_4AtoC  | GTCATCTTAGTCATTACCTG | AACGAACACCGCAGGTAATGACTAAGATG          | 15              | 14                      |
| RNF2_4c_4AtoT  | GTCATCTTAGTCATTACCTG | AACGAACACCACAGGTAATGACTAAGATG          | 15              | 14                      |
| RNF2_4c_4AtoG  | GTCATCTTAGTCATTACCTG | AACGAACACCCAGGTAATGACTAAGATG           | 15              | 14                      |
| RNF2_4c_5GtoT  | GTCATCTTAGTCATTACCTG | AACGAACACATCAGGTAATGACTAAGATG          | 15              | 14                      |
| RNF2_4c_6GtoA  | GTCATCTTAGTCATTACCTG | AACGAACATCTCAGGTAATGACTAAGATG          | 15              | 14                      |
| RNF2_4c_7TtoC  | GTCATCTTAGTCATTACCTG | AACGAACGCCTCAGGTAATGACTAAGATG          | 15              | 14                      |
| RUNX1_4d_1CtoA | GCATTTTCAGGAGGAAGCGA | TGCTGAAGCCATCTCTTCTCTGAAAAAT           | 15              | 15                      |
| RUNX1_4d_1CtoG | GCATTTTCAGGAGGAAGCGA | TGCTGAAGCCATCCCTTCTCTGAAAAAT           | 15              | 15                      |
| RUNX1_4d_1CtoT | GCATTTTCAGGAGGAAGCGA | TGCTGAAGCCATCACTTCTCTGAAAAAT           | 15              | 15                      |
| RUNX1_4d_2GtoA | GCATTTTCAGGAGGAAGCGA | TGCTGAAGCCATTGCTTCTCTGAAAAAT           | 15              | 15                      |
| RUNX1_4d_3AtoC | GCATTTTCAGGAGGAAGCGA | TGCTGAAGCCAGCGCTTCTCTGAAAAAT           | 15              | 15                      |
| RUNX1_4d_3AtoG | GCATTTTCAGGAGGAAGCGA | TGCTGAAGCCACCGCTTCTCTGAAAAAT           | 15              | 15                      |

|                         |                        |                                                |    |    |
|-------------------------|------------------------|------------------------------------------------|----|----|
| RUNX1_4d_3AtoT          | GCATTTTCAGGAGGAAGCGA   | TGCTGAAGCCAACGCTTCTCCTGAAAAAT                  | 15 | 15 |
| RUNX1_4d_4ToA           | GCATTTTCAGGAGGAAGCGA   | TGCTGAAGCCCTTCGCTTCTCCTGAAAAAT                 | 15 | 15 |
| RUNX1_4d_4ToC           | GCATTTTCAGGAGGAAGCGA   | TGCTGAAGCCGTCGCTTCTCCTGAAAAAT                  | 15 | 15 |
| RUNX1_4d_4ToG           | GCATTTTCAGGAGGAAGCGA   | TGCTGAAGCCCTCGCTTCTCCTGAAAAAT                  | 15 | 15 |
| RUNX1_4d_5GtoT          | GCATTTTCAGGAGGAAGCGA   | TGCTGAAGCAATCGCTTCTCCTGAAAAAT                  | 15 | 15 |
| RUNX1_4d_6GtoC          | GCATTTTCAGGAGGAAGCGA   | TGCTGAAGGCATCGCTTCTCCTGAAAAAT                  | 15 | 15 |
| VEGFA_4e_1ToA           | GATGTCTGCAGGCCAGATGA   | AATGTGCCATCTGGAGCCCTCTTCTGGCCTGCAGA            | 13 | 22 |
| VEGFA_4e_1ToC           | GATGTCTGCAGGCCAGATGA   | AATGTGCCATCTGGAGCCCTCGTCTGGCCTGCAGA            | 13 | 22 |
| VEGFA_4e_1ToG           | GATGTCTGCAGGCCAGATGA   | AATGTGCCATCTGGAGCCCTCTTCTGGCCTGCAGA            | 13 | 22 |
| VEGFA_4e_2GtoA          | GATGTCTGCAGGCCAGATGA   | AATGTGCCATCTGGAGCCCTTATCTGGCCTGCAGA            | 13 | 22 |
| VEGFA_4e_3AtoC          | GATGTCTGCAGGCCAGATGA   | AATGTGCCATCTGGAGCCCGCATCTGGCCTGCAGA            | 13 | 22 |
| VEGFA_4e_3AtoG          | GATGTCTGCAGGCCAGATGA   | AATGTGCCATCTGGAGCCCATCTGGCCTGCAGA              | 13 | 22 |
| VEGFA_4e_3AtoT          | GATGTCTGCAGGCCAGATGA   | AATGTGCCATCTGGAGCCACATCTGGCCTGCAGA             | 13 | 22 |
| VEGFA_4e_5GtoT          | GATGTCTGCAGGCCAGATGA   | AATGTGCCATCTGGAGCCTCATCTGGCCTGCAGA             | 13 | 22 |
| VEGFA_4e_6GtoC          | GATGTCTGCAGGCCAGATGA   | AATGTGCCATCTGGAGCCCTCATCTGGCCTGCAGA            | 13 | 22 |
| VEGFA_4e_7CtoA          | GATGTCTGCAGGCCAGATGA   | AATGTGCCATCTGGAGCCCTCATCTGGCCTGCAGA            | 13 | 22 |
| VEGFA_4e_7CtoT          | GATGTCTGCAGGCCAGATGA   | AATGTGCCATCTGGAAACCCATCTGGCCTGCAGA             | 13 | 22 |
| VEGFA_4e_9CtoG          | GATGTCTGCAGGCCAGATGA   | AATGTGCCATCTGCAGCCCTCATCTGGCCTGCAGA            | 13 | 22 |
| *HEK3_4f_1Ains          | GGCCAGACTGAGCAGCTGA    | TCTGCCATCATCGTGCTCAGTCTG                       | 13 | 11 |
| *HEK3_4f_1CTTins        | GGCCAGACTGAGCAGCTGA    | TCTGCCATCAAAGCGTGCTCAGTCTG                     | 13 | 13 |
| *HEK3_4f_1Tdel          | GGCCAGACTGAGCAGCTGA    | TCTGCCATCCGTGGTCAAGTCTG                        | 13 | 9  |
| HEK3_4f_1-3TGAdel       | GGCCAGACTGAGCAGCTGA    | TGGAGGAAGCAGGGCTTCTTTCTCTGCCACGTGCTCAGTCTG     | 13 | 31 |
| RNF2_4f_1Tins           | GTCATCTTAGTCATTACCTG   | AACGAACACCTCAGAGTAATGACTAAGATG                 | 15 | 15 |
| RNF2_4f_1GTins          | GTCATCTTAGTCATTACCTG   | AACGAACACCTCAGTACGTAATGACTAAGATG               | 15 | 17 |
| RNF2_4f_4Adel           | GTCATCTTAGTCATTACCTG   | AACGAACACCCAGGTAATGACTAAGATG                   | 15 | 13 |
| RNF2_4f_3-5GAGdel       | GTCATCTTAGTCATTACCTG   | AACGAACACAGGTAATGACTAAGATG                     | 15 | 11 |
| FANCF_4f_3Cins          | GGAAATCCCTTCTGCAGCACC  | GGAAAAGCGATCCAGGGTCTGCAGAAGGGAT                | 14 | 18 |
| FANCF_4f_4GTins         | GGAAATCCCTTCTGCAGCACC  | GGAAAAGCGATCCAAATCGGTGCTGCAGAAGGGAT            | 14 | 20 |
| FANCF_4f_6Gdel          | GGAAATCCCTTCTGCAGCACC  | GGAAAAGCGATCAGGTGCTGCAGAAGGGAT                 | 14 | 16 |
| FANCF_4f_5-7GGAdel      | GGAAATCCCTTCTGCAGCACC  | GGAAAAGCGAAGGTGCTGCAGAAGGGAT                   | 14 | 14 |
| EMX1_4f_6Tins           | GAGTCCGAGCAGAAGAAGAA   | GTGATGGGAGCACCTTCTTCTTCTGCTCGGA                | 14 | 17 |
| EMX1_4f_1TGCins         | GAGTCCGAGCAGAAGAAGAA   | GTGATGGGAGCCCTTCGCATTCTTCTGCTCGGA              | 14 | 19 |
| EMX1_4f_5Gdel           | GAGTCCGAGCAGAAGAAGAA   | GTGATGGGAGCCTTCTTCTTCTGCTCGGA                  | 14 | 15 |
| EMX1_4f_4-6GGGdel       | GAGTCCGAGCAGAAGAAGAA   | GTGATGGGAGTTCTTCTTCTGCTCGGA                    | 14 | 13 |
| RUNX1_4f_1Cins          | GCATTTTCAGGAGGAAGCGA   | TGCTGAAGCCATCGGCTTCTCCTGAAAAAT                 | 15 | 16 |
| RUNX1_4f_1ATGins        | GCATTTTCAGGAGGAAGCGA   | TGCTGAAGCCATCCATGCTTCTCCTGAAAAAT               | 15 | 18 |
| RUNX1_4f_2Gdel          | GCATTTTCAGGAGGAAGCGA   | TGCTGAAGCCATGCTTCTCCTGAAAAAT                   | 15 | 14 |
| RUNX1_4f_2-4GATdel      | GCATTTTCAGGAGGAAGCGA   | TGCTGAAGCCGCTTCTCCTGAAAAAT                     | 15 | 12 |
| VEGFA_4f_4Cins          | GATGTCTGCAGGCCAGATGA   | AATGTGCCATCTGGAGCCGCTCATCTGGCCTGCAGA           | 13 | 23 |
| VEGFA_4f_2ACAins        | GATGTCTGCAGGCCAGATGA   | AATGTGCCATCTGGAGCCCTTGTCTATCTGGCCTGCAGA        | 13 | 25 |
| VEGFA_4f_3Adel          | GATGTCTGCAGGCCAGATGA   | AATGTGCCATCTGGAGCCCATCTGGCCTGCAGA              | 13 | 21 |
| VEGFA_4f_2-4GAGdel      | GATGTCTGCAGGCCAGATGA   | AATGTGCCATCTGGAGCCCATCTGGCCTGCAGA              | 13 | 19 |
| DNMT1_4f_4Cins          | GATTCTGGTGCCAGAAACA    | TCCCGTCACCCGCTGTTTCTGGCACCAGG                  | 13 | 16 |
| DNMT1_4f_1TCAins        | GATTCTGGTGCCAGAAACA    | TCCCGTCACCCCTGTGATTCTGGCACCAGG                 | 13 | 18 |
| DNMT1_4f_3Adel          | GATTCTGGTGCCAGAAACA    | TCCCGTCACCCCGTCTTCTGGCACCAGG                   | 13 | 14 |
| DNMT1_4f_3-5AGGdel      | GATTCTGGTGCCAGAAACA    | TCCCGTCACCGTCTTCTGGCACCAGG                     | 13 | 12 |
| HEK3_4g_del1-5          | GGCCAGACTGAGCAGCTGA    | TGGAGGAAGCAGGGCTTCTTTCTCTGCCGTGCTCAGTCTG       | 13 | 29 |
| HEK3_4g_del1-10         | GGCCAGACTGAGCAGCTGA    | TGGAGGAAGCAGGGCTTCTTTCTCCCGTGCTCAGTCTG         | 13 | 24 |
| HEK3_4g_del1-15         | GGCCAGACTGAGCAGCTGA    | TGGAGGAAGCAGGGCTTCCCGTGCTCAGTCTG               | 13 | 19 |
| HEK3_4g_del1-25         | GGCCAGACTGAGCAGCTGA    | TGCTCTGCGACGCCCTCTGGAGGAAGCGTCTCAGTCTG         | 13 | 26 |
| HEK3_4g_del1-30         | GGCCAGACTGAGCAGCTGA    | TGCTCTGCGACGCCCTCTGGAGGTGCTCAGTCTG             | 13 | 21 |
| HEK3_4g_del1-80         | GGCCAGACTGAGCAGCTGA    | AGTATCCCGGTGCAGGAGCTCGTCTCAGTCTG               | 13 | 20 |
| HEK3_4h_1CTTins_5Gdel   | GGCCAGACTGAGCAGCTGA    | TGGAGGAAGCAGGGCTTCTTTCTCTGCATCAAAGCGTCTCAGTCTG | 13 | 36 |
| HEK3_4h_1CTTins_2GtoC   | GGCCAGACTGAGCAGCTGA    | TGGAGGAAGCAGGGCTTCTTTCTCTGCATGAAAGCGTCTCAGTCTG | 13 | 37 |
| HEK3_4h_1Tdel_5GtoC     | GGCCAGACTGAGCAGCTGA    | TGGAGGAAGCAGGGCTTCTTTCTCTGCGATCCGTGCTCAGTCTG   | 13 | 33 |
| HEK3_4h_2GtoC_6GtoT     | GGCCAGACTGAGCAGCTGA    | TGGAGGAAGCAGGGCTTCTTTCTCTGACATGACGTGCTCAGTCTG  | 13 | 34 |
| RNF2_4h_2AAins_3-4GAdel | GTCATCTTAGTCATTACCTG   | AACGAACACCATTTGGTAATGACTAAGATG                 | 15 | 15 |
| RNF2_4h_1Ains_5GtoC     | GTCATCTTAGTCATTACCTG   | AACGAACACGTCAAGTAAATGACTAAGATG                 | 15 | 14 |
| RNF2_4h_1-2CTdel_6GtoT  | GTCATCTTAGTCATTACCTG   | AACGAACAACCTCGTAATGACTAAGATG                   | 15 | 12 |
| RNF2_4h_1CtoA_5GtoT     | GTCATCTTAGTCATTACCTG   | AACGAACACATCATGTAATGACTAAGATG                  | 15 | 14 |
| FANCF_4h_1Tins_4-5TGdel | GGAAATCCCTTCTGCAGCACC  | GGAAAAGCGATCCGGTAGCTGCAGAAGGGAT                | 14 | 16 |
| FANCF_4h_1Tins_6GtoA    | GGAAATCCCTTCTGCAGCACC  | GGAAAAGCGATTCAGGTAGCTGCAGAAGGGAT               | 14 | 18 |
| FANCF_4h_2Cdel_5GtoT    | GGAAATCCCTTCTGCAGCACC  | GGAAAAGCGATCAAAGTCTGCAGAAGGGAT                 | 14 | 16 |
| FANCF_4h_1AtoC_6GtoT    | GGAAATCCCTTCTGCAGCACC  | GGAAAAGCGATACAGGGCTGCAGAAGGGAT                 | 14 | 17 |
| <b>nicking sgRNA</b>    | <b>spacer sequence</b> |                                                |    |    |
| HEK3_4a_+90             | GTCAACCAGTATCCCGGTGC   |                                                |    |    |
| HEK3_4b_+90             | GTCAACCAGTATCCCGGTGC   |                                                |    |    |
| RNF2_4c_+41             | GTCAACCATTAAGCAAAACAT  |                                                |    |    |
| FANCF_4d_+48            | GGGGTCCCAGGTGCTGACGT   |                                                |    |    |
| EMX1_4e_+53             | GACATCGATGTCTCCCAT     |                                                |    |    |
| RUNX1_4f_+38            | GATGAAGCACTGTGGGTACGA  |                                                |    |    |
| VEGFA_4g_+57            | GATGTACAGAGAGCCAGGGC   |                                                |    |    |
| DNMT1_4h_+49            | GCCCTTCAGCTAAAATAAAGG  |                                                |    |    |

Figure 5 sequences:

| pegRNA                   | spacer sequence       | 3' extension                                                                                     | PBS length (nt) | RT template length (nt) |
|--------------------------|-----------------------|--------------------------------------------------------------------------------------------------|-----------------|-------------------------|
| HBB_5a_install           | GCATGGTGCACCTGACTCCTG | AGACTTCTCCACAGGAGTCAGGTGCAC                                                                      | 13              | 14                      |
| HBB_5a_correct           | GCATGGTGCACCTGACTCCTG | AGACTTCTCCTCAGGAGTCAGGTGCAC                                                                      | 13              | 14                      |
| HBB_5a_correct_w_silent  | GCATGGTGCACCTGACTCCTG | AGACTTCTCTCAGGAGTCAGGTGCAC                                                                       | 13              | 14                      |
| HEXA_5b_install          | GTACCTGAACCGTATATCCTA | AGTCAGGGCCATAGGATAGATATACGGTTT                                                                   | 12              | 14                      |
| HEXA_5b_correct          | GATCCTTCCAGTCAGGGCCAT | ACCTGAACCGTATATCCTATGGCCCTGACTG                                                                  | 10              | 21                      |
| HEXA_5b_correct_w_silent | GATCCTTCCAGTCAGGGCCAT | GTACCTGAACCGTATATCTTATGGCCCTGACT                                                                 | 9               | 27                      |
| PRNP_5c_6GtoT            | GCAGTGGTGGGGGGCCTTGG  | ATGTAGACGCCAAGGCCCCCACC                                                                          | 12              | 12                      |
| DNMT1_5d_5GtoT           | GCGGGCTGGAGCTGTTCGCGC | AAGATGCAAGCGCGAACAGTCCAG                                                                         | 13              | 12                      |
| *HEK3_5e_1TtoG           | GGCCAGACTGAGCACGTGA   | TCTGCCATCCCCTGCTCAGTCTG                                                                          | 13              | 10                      |
| *HEK3_5e_1CTTins         | GGCCAGACTGAGCACGTGA   | TCTGCCATCAAAGCGTGTCTCAGTCTG                                                                      | 13              | 10                      |
| RNF2_5e_1CtoG            | GTCATCTTAGTCATTACCTG  | AACGAACACCTCACGTAATGACTAAGATG                                                                    | 15              | 14                      |
| PRNP_5e_6GtoT            | GCAGTGGTGGGGGGCCTTGG  | ATGTAGACGCCAAGGCCCCCACC                                                                          | 12              | 12                      |
| HBB_5e_4AtoT             | GCATGGTGCACCTGACTCCTG | AGACTTCTCCACAGGAGTCAGGTGCAC                                                                      | 13              | 14                      |
| HBB_5e_correct           | GCATGGTGCACCTGACTCCTG | AGACTTCTCTCAGGAGTCAGGTGCAC                                                                       | 13              | 14                      |
| HEK3_5g_1His6ins         | GGCCAGACTGAGCACGTGA   | TGGAGGAAGCAGGGCTTCCTTTCCCTCTGCCATCAATGATGGT<br>GATGATGGTGCCTGCTCAGTCTG                           | 13              | 52                      |
| HEK3_5g_1FLAGins         | GGCCAGACTGAGCACGTGA   | TGGAGGAAGCAGGGCTTCCTTTCCCTCTGCCATCACTTATCGT<br>CGTCATCCTTGTAATCCCGTCTCAGTCTG                     | 13              | 58                      |
| HEK3_5g_1LoxPins         | GGCCAGACTGAGCACGTGA   | TGGAGGAAGCAGGGCTTCCTTTCCCTCTGCCATCAATAACTTC<br>GTATAATGTATGCTATACGAAGTTATAACAATCGTGCTCAGT<br>CTG | 13              | 74                      |

  

| nicking gRNA             | spacer sequence       |
|--------------------------|-----------------------|
| HBB_5a,e                 | GCCTTGATACCAACCTGCCCA |
| HEXA_5b_install          | GCTTTCACCTTCAAATGCCA  |
| HEXA_5b_correct          | GTACCTGAACCGTATATCCTA |
| HEXA_5b_correct_w_silent | GTACCTGAACCGTATATCTTA |
| PRNP_5c,e                | GCATGTTTTTCACGATAGTAA |
| HEK3_5e,g                | GTCACCAGTATCCCGGTGC   |
| DNMT1_5d                 | GCCGCGCGCGGAAAAAGCCG  |
| RNF2_5e                  | GTCACCATTAAAGCAAACAT  |

Extended Data Figure 4 sequences:

| pegRNA             | spacer sequence      | 3' extension sequence                                                        | PBS length (nt) | RT template length (nt) |
|--------------------|----------------------|------------------------------------------------------------------------------|-----------------|-------------------------|
| *HEK3_ED4b_1Tdel   | GGCCAGACTGAGCACGTGA  | TCTGCCATCCGTGCTCAGTCTG                                                       | 13              | 9                       |
| *HEK3_ED4b_1Ains   | GGCCAGACTGAGCACGTGA  | TCTGCCATCATCGTGTCTCAGTCTG                                                    | 13              | 11                      |
| *HEK3_ED4b_1CTTins | GGCCAGACTGAGCACGTGA  | TCTGCCATCAAAGCGTGTCTCAGTCTG                                                  | 13              | 13                      |
| *HEK3_ED4c_2GtoC   | GGCCAGACTGAGCACGTGA  | TCTGCCATGACGTGCTCAGTCTG                                                      | 13              | 10                      |
| HEK3_ED4d_1FLAGins | GGCCAGACTGAGCACGTGA  | TGGAGGAAGCAGGGCTTCCTTTCCCTCTGCCATCACTTATCGT<br>CGTCATCCTTGTAATCCCGTCTCAGTCTG | 13              | 58                      |
| RNF2_ED4e_1CtoA    | GTCATCTTAGTCATTACCTG | AACGAACACCTCATGTAATGACTAAGATG                                                | 15              | 14                      |
| EMX1_ED4f_1GtoC    | GAGTCCGAGCAGAAGAAGAA | ATGGGAGCCCTTGTCTCTGCTCGG                                                     | 13              | 13                      |
| HBB_ED4g_2TtoA     | GTAACGGCAGACTTCTCCTC | ATCTGACTCCTGTGGAGAAGTCTGCC                                                   | 12              | 14                      |
| FANCF_ED4h_1GtoC   | GGAATCCCTTCTGCAGCACC | GGAAAAGCGATCCAGGAGCTGCAGAAGGG                                                | 12              | 17                      |

Extended Data Figure 5 sequences:

| pegRNA        | spacer sequence      | 3' extension sequence                        | PBS length (nt) | RT template length (nt) |
|---------------|----------------------|----------------------------------------------|-----------------|-------------------------|
| VEGFA_ED5a_31 | GATGTCTGCAGGCCAGATGA | CCCTCTGACAATGTGCCATCTGGAGCACTCATCTGGCCTGCAGA | 13              | 31                      |
| VEGFA_ED5a_30 | GATGTCTGCAGGCCAGATGA | CCTCTGACAATGTGCCATCTGGAGCACTCATCTGGCCTGCAGA  | 13              | 30                      |
| VEGFA_ED5a_29 | GATGTCTGCAGGCCAGATGA | CTCTGACAATGTGCCATCTGGAGCACTCATCTGGCCTGCAGA   | 13              | 29                      |
| VEGFA_ED5a_28 | GATGTCTGCAGGCCAGATGA | TCTGACAATGTGCCATCTGGAGCACTCATCTGGCCTGCAGA    | 13              | 28                      |
| VEGFA_ED5a_27 | GATGTCTGCAGGCCAGATGA | CTGACAATGTGCCATCTGGAGCACTCATCTGGCCTGCAGA     | 13              | 27                      |
| VEGFA_ED5a_26 | GATGTCTGCAGGCCAGATGA | TGACAATGTGCCATCTGGAGCACTCATCTGGCCTGCAGA      | 13              | 26                      |
| VEGFA_ED5a_25 | GATGTCTGCAGGCCAGATGA | GACAATGTGCCATCTGGAGCACTCATCTGGCCTGCAGA       | 13              | 25                      |
| VEGFA_ED5a_24 | GATGTCTGCAGGCCAGATGA | ACAATGTGCCATCTGGAGCACTCATCTGGCCTGCAGA        | 13              | 24                      |
| VEGFA_ED5a_23 | GATGTCTGCAGGCCAGATGA | CAATGTGCCATCTGGAGCACTCATCTGGCCTGCAGA         | 13              | 23                      |
| VEGFA_ED5a_22 | GATGTCTGCAGGCCAGATGA | AATGTGCCATCTGGAGCACTCATCTGGCCTGCAGA          | 13              | 22                      |
| VEGFA_ED5a_21 | GATGTCTGCAGGCCAGATGA | ATGTGCCATCTGGAGCACTCATCTGGCCTGCAGA           | 13              | 21                      |
| VEGFA_ED5a_20 | GATGTCTGCAGGCCAGATGA | TGTGCCATCTGGAGCACTCATCTGGCCTGCAGA            | 13              | 20                      |
| VEGFA_ED5a_19 | GATGTCTGCAGGCCAGATGA | GTGCCATCTGGAGCACTCATCTGGCCTGCAGA             | 13              | 19                      |
| VEGFA_ED5a_18 | GATGTCTGCAGGCCAGATGA | TGCCATCTGGAGCACTCATCTGGCCTGCAGA              | 13              | 18                      |
| VEGFA_ED5a_17 | GATGTCTGCAGGCCAGATGA | GCCATCTGGAGCACTCATCTGGCCTGCAGA               | 13              | 17                      |
| VEGFA_ED5a_16 | GATGTCTGCAGGCCAGATGA | CCATCTGGAGCACTCATCTGGCCTGCAGA                | 13              | 16                      |
| VEGFA_ED5a_15 | GATGTCTGCAGGCCAGATGA | CATCTGGAGCACTCATCTGGCCTGCAGA                 | 13              | 15                      |
| VEGFA_ED5a_14 | GATGTCTGCAGGCCAGATGA | ATCTGGAGCACTCATCTGGCCTGCAGA                  | 13              | 14                      |
| VEGFA_ED5a_13 | GATGTCTGCAGGCCAGATGA | TCTGGAGCACTCATCTGGCCTGCAGA                   | 13              | 13                      |

|                   |                      |                                                  |    |    |
|-------------------|----------------------|--------------------------------------------------|----|----|
| VEGFA_ED5a_12     | GATGTCTGCAGGCCAGATGA | CTGGAGCACTCATCTGGCCTGCAGA                        | 13 | 12 |
| VEGFA_ED5a_11     | GATGTCTGCAGGCCAGATGA | TGGAGCACTCATCTGGCCTGCAGA                         | 13 | 11 |
| VEGFA_ED5a_10     | GATGTCTGCAGGCCAGATGA | GGAGCACTCATCTGGCCTGCAGA                          | 13 | 10 |
| VEGFA_ED5a_9      | GATGTCTGCAGGCCAGATGA | GAGCACTCATCTGGCCTGCAGA                           | 13 | 9  |
| VEGFA_ED5a_8      | GATGTCTGCAGGCCAGATGA | AGCACTCATCTGGCCTGCAGA                            | 13 | 8  |
| DNMT1_ED5b_31     | GATTCTGGTGCCAGAAACA  | AGGACTAGTTTCTGCCCTCCCGTCACCACTGTTTCTGGCACCAGG    | 13 | 31 |
| DNMT1_ED5b_30     | GATTCTGGTGCCAGAAACA  | GGACTAGTTTCTGCCCTCCCGTCACCACTGTTTCTGGCACCAGG     | 13 | 30 |
| DNMT1_ED5b_29     | GATTCTGGTGCCAGAAACA  | GACTAGTTTCTGCCCTCCCGTCACCACTGTTTCTGGCACCAGG      | 13 | 29 |
| DNMT1_ED5b_28     | GATTCTGGTGCCAGAAACA  | ACTAGTTTCTGCCCTCCCGTCACCACTGTTTCTGGCACCAGG       | 13 | 28 |
| DNMT1_ED5b_27     | GATTCTGGTGCCAGAAACA  | CTAGTTTCTGCCCTCCCGTCACCACTGTTTCTGGCACCAGG        | 13 | 27 |
| DNMT1_ED5b_26     | GATTCTGGTGCCAGAAACA  | TAGTTTCTGCCCTCCCGTCACCACTGTTTCTGGCACCAGG         | 13 | 26 |
| DNMT1_ED5b_25     | GATTCTGGTGCCAGAAACA  | AGTTTCTGCCCTCCCGTCACCACTGTTTCTGGCACCAGG          | 13 | 25 |
| DNMT1_ED5b_24     | GATTCTGGTGCCAGAAACA  | GTTTCTGCCCTCCCGTCACCACTGTTTCTGGCACCAGG           | 13 | 24 |
| DNMT1_ED5b_23     | GATTCTGGTGCCAGAAACA  | TTTCTGCCCTCCCGTCACCACTGTTTCTGGCACCAGG            | 13 | 23 |
| DNMT1_ED5b_22     | GATTCTGGTGCCAGAAACA  | TCTGCCCTCCCGTCACCACTGTTTCTGGCACCAGG              | 13 | 22 |
| DNMT1_ED5b_21     | GATTCTGGTGCCAGAAACA  | CTGCCCTCCCGTCACCACTGTTTCTGGCACCAGG               | 13 | 21 |
| DNMT1_ED5b_20     | GATTCTGGTGCCAGAAACA  | TGCCCTCCCGTCACCACTGTTTCTGGCACCAGG                | 13 | 20 |
| DNMT1_ED5b_19     | GATTCTGGTGCCAGAAACA  | GCCCTCCCGTCACCACTGTTTCTGGCACCAGG                 | 13 | 19 |
| DNMT1_ED5b_18     | GATTCTGGTGCCAGAAACA  | CCCTCCCGTCACCACTGTTTCTGGCACCAGG                  | 13 | 18 |
| DNMT1_ED5b_17     | GATTCTGGTGCCAGAAACA  | CCTCCCGTCACCACTGTTTCTGGCACCAGG                   | 13 | 17 |
| DNMT1_ED5b_16     | GATTCTGGTGCCAGAAACA  | CTCCCGTCACCACTGTTTCTGGCACCAGG                    | 13 | 16 |
| DNMT1_ED5b_15     | GATTCTGGTGCCAGAAACA  | TCCCGTCACCACTGTTTCTGGCACCAGG                     | 13 | 15 |
| DNMT1_ED5b_14     | GATTCTGGTGCCAGAAACA  | CCCGTCACCACTGTTTCTGGCACCAGG                      | 13 | 14 |
| DNMT1_ED5b_13     | GATTCTGGTGCCAGAAACA  | CCGTACCACTGTTTCTGGCACCAGG                        | 13 | 13 |
| DNMT1_ED5b_12     | GATTCTGGTGCCAGAAACA  | CGTACCACTGTTTCTGGCACCAGG                         | 13 | 12 |
| DNMT1_ED5b_11     | GATTCTGGTGCCAGAAACA  | GTCACCACTGTTTCTGGCACCAGG                         | 13 | 11 |
| DNMT1_ED5b_10     | GATTCTGGTGCCAGAAACA  | TCACCACTGTTTCTGGCACCAGG                          | 13 | 10 |
| DNMT1_ED5b_9      | GATTCTGGTGCCAGAAACA  | CACCACTGTTTCTGGCACCAGG                           | 13 | 9  |
| DNMT1_ED5b_8      | GATTCTGGTGCCAGAAACA  | ACCCTGTTTCTGGCACCAGG                             | 13 | 8  |
| RUNX1_ED5c_31     | GCATTTTCAGGAGGAAGCGA | AATGACTCAAATATGCTGTCTGAAGCAATCGCTTCCCTCCTGAAAAAT | 15 | 31 |
| RUNX1_ED5c_30     | GCATTTTCAGGAGGAAGCGA | ATGACTCAAATATGCTGTCTGAAGCAATCGCTTCCCTCCTGAAAAAT  | 15 | 30 |
| RUNX1_ED5c_29     | GCATTTTCAGGAGGAAGCGA | TGACTCAAATATGCTGTCTGAAGCAATCGCTTCCCTCCTGAAAAAT   | 15 | 29 |
| RUNX1_ED5c_28     | GCATTTTCAGGAGGAAGCGA | GACTCAAATATGCTGTCTGAAGCAATCGCTTCCCTCCTGAAAAAT    | 15 | 28 |
| RUNX1_ED5c_27     | GCATTTTCAGGAGGAAGCGA | ACTCAAATATGCTGTCTGAAGCAATCGCTTCCCTCCTGAAAAAT     | 15 | 27 |
| RUNX1_ED5c_26     | GCATTTTCAGGAGGAAGCGA | CTCAAATATGCTGTCTGAAGCAATCGCTTCCCTCCTGAAAAAT      | 15 | 26 |
| RUNX1_ED5c_25     | GCATTTTCAGGAGGAAGCGA | TCAAATATGCTGTCTGAAGCAATCGCTTCCCTCCTGAAAAAT       | 15 | 25 |
| RUNX1_ED5c_24     | GCATTTTCAGGAGGAAGCGA | CAAATATGCTGTCTGAAGCAATCGCTTCCCTCCTGAAAAAT        | 15 | 24 |
| RUNX1_ED5c_23     | GCATTTTCAGGAGGAAGCGA | AAATATGCTGTCTGAAGCAATCGCTTCCCTCCTGAAAAAT         | 15 | 23 |
| RUNX1_ED5c_22     | GCATTTTCAGGAGGAAGCGA | AATATGCTGTCTGAAGCAATCGCTTCCCTCCTGAAAAAT          | 15 | 22 |
| RUNX1_ED5c_21     | GCATTTTCAGGAGGAAGCGA | ATATGCTGTCTGAAGCAATCGCTTCCCTCCTGAAAAAT           | 15 | 21 |
| RUNX1_ED5c_20     | GCATTTTCAGGAGGAAGCGA | TATGCTGTCTGAAGCAATCGCTTCCCTCCTGAAAAAT            | 15 | 20 |
| RUNX1_ED5c_19     | GCATTTTCAGGAGGAAGCGA | ATGCTGTCTGAAGCAATCGCTTCCCTCCTGAAAAAT             | 15 | 19 |
| RUNX1_ED5c_18     | GCATTTTCAGGAGGAAGCGA | TGCTGTCTGAAGCAATCGCTTCCCTCCTGAAAAAT              | 15 | 18 |
| RUNX1_ED5c_17     | GCATTTTCAGGAGGAAGCGA | GCTGTCTGAAGCAATCGCTTCCCTCCTGAAAAAT               | 15 | 17 |
| RUNX1_ED5c_16     | GCATTTTCAGGAGGAAGCGA | CTGTCTGAAGCAATCGCTTCCCTCCTGAAAAAT                | 15 | 16 |
| RUNX1_ED5c_15     | GCATTTTCAGGAGGAAGCGA | TGCTGAAGCAATCGCTTCCCTCCTGAAAAAT                  | 15 | 15 |
| RUNX1_ED5c_14     | GCATTTTCAGGAGGAAGCGA | GTCTGAAGCAATCGCTTCCCTCCTGAAAAAT                  | 15 | 14 |
| RUNX1_ED5c_13     | GCATTTTCAGGAGGAAGCGA | TCTGAAGCAATCGCTTCCCTCCTGAAAAAT                   | 15 | 13 |
| RUNX1_ED5c_12     | GCATTTTCAGGAGGAAGCGA | CTGAAGCAATCGCTTCCCTCCTGAAAAAT                    | 15 | 12 |
| RUNX1_ED5c_11     | GCATTTTCAGGAGGAAGCGA | TGAAGCAATCGCTTCCCTCCTGAAAAAT                     | 15 | 11 |
| RUNX1_ED5c_10     | GCATTTTCAGGAGGAAGCGA | GAAGCAATCGCTTCCCTCCTGAAAAAT                      | 15 | 10 |
| RUNX1_ED5c_9      | GCATTTTCAGGAGGAAGCGA | AAGCAATCGCTTCCCTCCTGAAAAAT                       | 15 | 9  |
| FANCF_ED5d_1AtoG  | GGAATCCCTTCTGCAGCACC | GGAAAAGCGATCCAGGCGCTGCAGAAGGGAT                  | 14 | 17 |
| FANCF_ED5d_1AtoT  | GGAATCCCTTCTGCAGCACC | GGAAAAGCGATCCAGGAGCTGCAGAAGGGAT                  | 14 | 17 |
| FANCF_ED5d_2CtoA  | GGAATCCCTTCTGCAGCACC | GGAAAAGCGATCCAGTGTCTGCAGAAGGGAT                  | 14 | 17 |
| FANCF_ED5d_3CtoG  | GGAATCCCTTCTGCAGCACC | GGAAAAGCGATCCACGTGTCTGCAGAAGGGAT                 | 14 | 17 |
| FANCF_ED5d_3CtoT  | GGAATCCCTTCTGCAGCACC | GGAAAAGCGATCCAAGTGTCTGCAGAAGGGAT                 | 14 | 17 |
| FANCF_ED5d_4TtoA  | GGAATCCCTTCTGCAGCACC | GGAAAAGCGATCCTGGTGTCTGCAGAAGGGAT                 | 14 | 17 |
| FANCF_ED5d_4TtoG  | GGAATCCCTTCTGCAGCACC | GGAAAAGCGATCCCGTGTCTGCAGAAGGGAT                  | 14 | 17 |
| FANCF_ED5d_5GtoA  | GGAATCCCTTCTGCAGCACC | GGAAAAGCGATCTAGGTGTCTGCAGAAGGGAT                 | 14 | 17 |
| FANCF_ED5d_6GtoC  | GGAATCCCTTCTGCAGCACC | GGAAAAGCGATGCAGGTGTCTGCAGAAGGGAT                 | 14 | 17 |
| FANCF_ED5d_7AtoC  | GGAATCCCTTCTGCAGCACC | GGAAAAGCGAGCCAGGTGTCTGCAGAAGGGAT                 | 14 | 17 |
| FANCF_ED5d_8TtoC  | GGAATCCCTTCTGCAGCACC | GGAAAAGCGTCCAGGTGTCTGCAGAAGGGAT                  | 14 | 17 |
| FANCF_ED5d_10GtoT | GGAATCCCTTCTGCAGCACC | GGAAAAGCGATCCAGGTGTCTGCAGAAGGGAT                 | 14 | 17 |
| EMX1_ED5e_2AtoC   | GAGTCCGAGCAGAAGAAGAA | GTGATGGGAGCCCTGCTTCTTCTGCTCGGA                   | 14 | 16 |
| EMX1_ED5e_2AtoT   | GAGTCCGAGCAGAAGAAGAA | GTGATGGGAGCCCTACTTCTTCTGCTCGGA                   | 14 | 16 |
| EMX1_ED5e_3AtoG   | GAGTCCGAGCAGAAGAAGAA | GTGATGGGAGCCCTCTTCTTCTGCTCGGA                    | 14 | 16 |
| EMX1_ED5e_4GtoC   | GAGTCCGAGCAGAAGAAGAA | GTGATGGGAGCCCTTCTTCTGCTCGGA                      | 14 | 16 |
| EMX1_ED5e_5GtoA   | GAGTCCGAGCAGAAGAAGAA | GTGATGGGAGCTTCTTCTTCTGCTCGGA                     | 14 | 16 |
| EMX1_ED5e_5GtoT   | GAGTCCGAGCAGAAGAAGAA | GTGATGGGAGCACTTCTTCTTCTGCTCGGA                   | 14 | 16 |
| EMX1_ED5e_7CtoA   | GAGTCCGAGCAGAAGAAGAA | GTGATGGGATCCCTTCTTCTTCTGCTCGGA                   | 14 | 16 |
| EMX1_ED5e_8TtoA   | GAGTCCGAGCAGAAGAAGAA | GTGATGGGATGCCCTTCTTCTTCTGCTCGGA                  | 14 | 16 |
| EMX1_ED5e_8TtoC   | GAGTCCGAGCAGAAGAAGAA | GTGATGGGGGCCCTTCTTCTTCTGCTCGGA                   | 14 | 16 |
| EMX1_ED5e_8TtoG   | GAGTCCGAGCAGAAGAAGAA | GTGATGGGCGCCCTTCTTCTTCTGCTCGGA                   | 14 | 16 |
| EMX1_ED5e_9CtoG   | GAGTCCGAGCAGAAGAAGAA | GTGATGGCAGCCCTTCTTCTTCTGCTCGGA                   | 14 | 16 |
| EMX1_ED5e_9CtoT   | GAGTCCGAGCAGAAGAAGAA | GTGATGGAAGCCCTTCTTCTTCTGCTCGGA                   | 14 | 16 |

|                  |                      |                                  |    |    |
|------------------|----------------------|----------------------------------|----|----|
| DNMT1_ED5f_1AtoC | GATTCCTGGTGCCAGAAACA | GTCACCCCTGGTTCTGGCACCAGG         | 13 | 11 |
| DNMT1_ED5f_1AtoG | GATTCCTGGTGCCAGAAACA | GTCACCCCTGCTTCTGGCACCAGG         | 13 | 11 |
| DNMT1_ED5f_2CtoA | GATTCCTGGTGCCAGAAACA | GTCACCCCTTTTTCTGGCACCAGG         | 13 | 11 |
| DNMT1_ED5f_2CtoG | GATTCCTGGTGCCAGAAACA | GTCACCCCTTTTTCTGGCACCAGG         | 13 | 11 |
| DNMT1_ED5f_2CtoT | GATTCCTGGTGCCAGAAACA | GTCACCCCTATTTCTGGCACCAGG         | 13 | 11 |
| DNMT1_ED5f_3AtoT | GATTCCTGGTGCCAGAAACA | GTCACCCAGTTTCTGGCACCAGG          | 13 | 11 |
| DNMT1_ED5f_4GtoA | GATTCCTGGTGCCAGAAACA | GTCACCCCTGTTTCTGGCACCAGG         | 13 | 11 |
| DNMT1_ED5f_5GtoT | GATTCCTGGTGCCAGAAACA | GTCACCACTGTTTCTGGCACCAGG         | 13 | 11 |
| DNMT1_ED5f_6GtoC | GATTCCTGGTGCCAGAAACA | GTCACGCCTGTTTCTGGCACCAGG         | 13 | 11 |
| DNMT1_ED5f_8TtoA | GATTCCTGGTGCCAGAAACA | GCCCTCCCGTCTCCCTGTTTCTGGCACCAGG  | 13 | 19 |
| DNMT1_ED5f_8TtoC | GATTCCTGGTGCCAGAAACA | GCCCTCCCGTCCGCCCTGTTTCTGGCACCAGG | 13 | 19 |
| DNMT1_ED5f_8TtoG | GATTCCTGGTGCCAGAAACA | GCCCTCCCGTCCCCCTGTTTCTGGCACCAGG  | 13 | 19 |

| nicking sgRNA | spacer sequence       |
|---------------|-----------------------|
| FANCF_4d_+48  | GGGGTCCCAGGTGCTGACGT  |
| EMX1_4e_+53   | GACATCGATGCTCTCCCAT   |
| DNMT1_4h_+49  | GCCCTTCAGTAAAAATAAAGG |

## Extended Data Figure 6 sequences:

| pegRNA           | spacer sequence      | 3' extension                    | PBS length (nt) | RT template length (nt) |
|------------------|----------------------|---------------------------------|-----------------|-------------------------|
| *HEK3_ED6a_C3    | GGCCCAGACTGAGCACGTGA | TCTGTATCACGTGCTCAGTCTG          | 13              | 10                      |
| *HEK3_ED6a_C4    | GGCCCAGACTGAGCACGTGA | TCTGTATCACGTGCTCAGTCTG          | 13              | 10                      |
| *HEK3_ED6a_C7    | GGCCCAGACTGAGCACGTGA | TCTGCCATTACGTGCTCAGTCTG         | 13              | 10                      |
| FANCF_ED6a_C3    | GGAATCCCTTCTGCAGCACC | GGAAAAGTGATCCAGGTGCTGCAGAAGGGAT | 14              | 17                      |
| FANCF_ED6a_C7    | GGAATCCCTTCTGCAGCACC | GGAAAAGCGATTCAGGTGCTGCAGAAGGGAT | 14              | 17                      |
| FANCF_ED6a_C8    | GGAATCCCTTCTGCAGCACC | GGAAAAGCGATTCAGGTGCTGCAGAAGGGAT | 14              | 17                      |
| EMX1_ED6a_C5     | GAGTCCGAGCAGAAGAAGAA | GTGATGGGAGTCTTCTTCTTCTGCTCGGA   | 14              | 16                      |
| EMX1_ED6a_C6     | GAGTCCGAGCAGAAGAAGAA | GTGATGGGAGCTTCTTCTTCTGCTCGGA    | 14              | 16                      |
| EMX1_ED6a_C7     | GAGTCCGAGCAGAAGAAGAA | GTGATGGGAGCTTCTTCTTCTGCTCGGA    | 14              | 16                      |
| EMX1_ED6c_C5_6   | GAGTCCGAGCAGAAGAAGAA | GTGATGGGAGTCTTCTTCTTCTGCTCGGA   | 14              | 16                      |
| EMX1_ED6c_C5_7   | GAGTCCGAGCAGAAGAAGAA | GTGATGGGAGTCTTCTTCTTCTGCTCGGA   | 14              | 16                      |
| EMX1_ED6c_C6_7   | GAGTCCGAGCAGAAGAAGAA | GTGATGGGAGCTTCTTCTTCTGCTCGGA    | 14              | 16                      |
| EMX1_ED6c_C5_6_7 | GAGTCCGAGCAGAAGAAGAA | GTGATGGGAGTTTTCTTCTTCTGCTCGGA   | 14              | 16                      |
| *HEK3_ED6d_A5    | GGCCCAGACTGAGCACGTGA | TCTGCCGTCACGTGCTCAGTCTG         | 13              | 10                      |
| *HEK3_ED6d_A8    | GGCCCAGACTGAGCACGTGA | TCTGCCATCCGGTCTCAGTCTG          | 13              | 10                      |

| nicking sgRNA    | spacer sequence      |
|------------------|----------------------|
| HEK3_ED6a-f_+90  | GTCAACCAGTATCCCGGTGC |
| FANCF_ED6a-f_+48 | GGGGTCCCAGGTGCTGACGT |
| EMX1_ED6a-f_+57  | GATGTACAGAGAGCCAGGGC |

| base editing sgRNA | spacer sequence       |
|--------------------|-----------------------|
| HEK3_ED6a-f_BE     | GTGCCATCACGTGCTCAGTCT |
| FANCF_ED6a-f_BE    | GAGCGATCCAGGTGCTGCAGA |
| EMX1_ED6a-f_BE     | GGAGCCCTTCTTCTTCTGCT  |

| on-target sgRNA | spacer sequence      |
|-----------------|----------------------|
| HEK3_ED6g       | GGCCCAGACTGAGCACGTGA |
| HEK4_ED6g       | GGCACTGCGGCTGGAGGTGG |
| EMX1_ED6g       | GAGTCCGAGCAGAAGAAGAA |
| FANCF_ED6g      | GGAATCCCTTCTGCAGCACC |

| on-target pegRNA      | spacer sequence      | 3' extension                        | PBS length (nt) | RT template length (nt) |
|-----------------------|----------------------|-------------------------------------|-----------------|-------------------------|
| *HEK3_ED6g-h_pegRNA_1 | GGCCCAGACTGAGCACGTGA | TCTGCCATCTCGTCTCAGTCTG              | 13              | 10                      |
| *HEK3_ED6g-h_pegRNA_2 | GGCCCAGACTGAGCACGTGA | TCTGCCATCAAAGCGTCTCAGTCTG           | 13              | 13                      |
| *HEK3_ED6g-h_pegRNA_3 | GGCCCAGACTGAGCACGTGA | TCTGCCATCCGTGCTCAGTCTG              | 13              | 9                       |
| *HEK3_ED6g-h_pegRNA_4 | GGCCCAGACTGAGCACGTGA | TCTGCCATCACGTGCTCAGTCTG             | 13              | 10                      |
| HEK4_ED6g-h_pegRNA_1  | GGCACTGCGGCTGGAGGTGG | TAAACGCCACCTCCAGCC                  | 9               | 10                      |
| HEK4_ED6g-h_pegRNA_2  | GGCACTGCGGCTGGAGGTGG | TAAACCCCCCTCCAGCC                   | 9               | 10                      |
| HEK4_ED6g-h_pegRNA_3  | GGCACTGCGGCTGGAGGTGG | TAAACCCCTTACACCTCCAGCC              | 9               | 13                      |
| HEK4_ED6g-h_pegRNA_4  | GGCACTGCGGCTGGAGGTGG | TAAACCCCCCTCCAGCC                   | 9               | 9                       |
| EMX1_ED6g-h_pegRNA_1  | GAGTCCGAGCAGAAGAAGAA | GTGATGGGAGCACTTCTTCTTCTGCTCGGA      | 14              | 16                      |
| EMX1_ED6g-h_pegRNA_2  | GAGTCCGAGCAGAAGAAGAA | GTGATGGGAGCCCTGCTTCTTCTGCTCGGA      | 14              | 16                      |
| EMX1_ED6g-h_pegRNA_3  | GAGTCCGAGCAGAAGAAGAA | GTGATGGGAGCCCTTTCGATCTTCTGCTCGGA    | 14              | 19                      |
| EMX1_ED6g-h_pegRNA_4  | GAGTCCGAGCAGAAGAAGAA | GTGATGGGAGTCTTCTTCTTCTGCTCGGA       | 14              | 13                      |
| FANCF_ED6g-h_pegRNA_1 | GGAATCCCTTCTGCAGCACC | GGAAAAGCGATCCAGGTGCTGCAGAAGGGAT     | 14              | 17                      |
| FANCF_ED6g-h_pegRNA_2 | GGAATCCCTTCTGCAGCACC | GGAAAAGCGATCCAGGTGCTGCAGAAGGGAT     | 14              | 17                      |
| FANCF_ED6g-h_pegRNA_3 | GGAATCCCTTCTGCAGCACC | GGAAAAGCGATCCAACTCGGTGCTGCAGAAGGGAT | 14              | 20                      |

| nicking sgRNA    | spacer sequence      |
|------------------|----------------------|
| HEK3_ED6g-h_+90  | GTCAACCAGTATCCCGGTGC |
| EMX1_ED6a-f_+57  | GATGTACAGAGAGCCAGGGC |
| FANCF_ED6a-f_+48 | GGGGTCCCAGGTGCTGACGT |

Extended Data Figure 8 sequences:

| pegRNA          | spacer sequence      | 3' extension sequence          | PBS length (nt) | RT template length (nt) |
|-----------------|----------------------|--------------------------------|-----------------|-------------------------|
| *HEK3_ED8_5GtoA | GGCCAGACTGAGCACGTGA  | TCTGTATACAGTGTCTAGTCTG         | 13              | 10                      |
| PRNP_ED8        | GCAGTGGTGGGGGCTTGG   | ATGTAGACGCCAAGCCCCACC          | 12              | 12                      |
| HEXA_ED8        | GTACTGAACCGTATATCCTA | AGTCAGGGCCATAGGATAGATATACGGTTC | 12              | 14                      |

Extended Data Figure 9 sequences:

| pegRNA   | spacer                | 3' extension (5' to 3')                | PBS length (nt) | RT template length (nt) |
|----------|-----------------------|----------------------------------------|-----------------|-------------------------|
| HBB 3.5  | GTAACGGCAGACTTCTCCAC  | ACCTGACTCCTGAGGAGAAGTCTGCC             | 12              | 14                      |
| HBB 3.7  | GCATGGTGCACCTGACTCCTG | AGACTTCTCCTCAGGAGTCAGGTGCAC            | 13              | 14                      |
| HBB 5.2  | GCATGGTGCACCTGACTCCTG | TAACGGCAGACTTCTCCTCAGGAGTCAGGTGCAC     | 13              | 19                      |
| HBB 5.3  | GCATGGTGCACCTGACTCCTG | ACGGCAGACTTCTCCTCAGGAGTCAGGTGCAC       | 13              | 17                      |
| HBB 5.4  | GCATGGTGCACCTGACTCCTG | GGCAGACTTCTCCTCAGGAGTCAGGTGCAC         | 13              | 16                      |
| HBB 5.5  | GCATGGTGCACCTGACTCCTG | GCAGACTTCTCCTCAGGAGTCAGGTGCAC          | 13              | 13                      |
| HBB 5.6  | GCATGGTGCACCTGACTCCTG | GACTTCTCCTCAGGAGTCAGGTGCAC             | 13              | 12                      |
| HBB 5.7  | GCATGGTGCACCTGACTCCTG | ACTTCTCCTCAGGAGTCAGGTGCAC              | 13              | 21                      |
| HBB 5.8  | GCATGGTGCACCTGACTCCTG | TAACGGCAGACTTCTCCTCAGGAGTCAGGTGCA      | 12              | 19                      |
| HBB 5.9  | GCATGGTGCACCTGACTCCTG | ACGGCAGACTTCTCCTCAGGAGTCAGGTGCA        | 12              | 17                      |
| HBB 5.10 | GCATGGTGCACCTGACTCCTG | GGCAGACTTCTCCTCAGGAGTCAGGTGCA          | 12              | 16                      |
| HBB 5.11 | GCATGGTGCACCTGACTCCTG | GCAGACTTCTCCTCAGGAGTCAGGTGCA           | 12              | 13                      |
| HBB 5.12 | GCATGGTGCACCTGACTCCTG | GACTTCTCCTCAGGAGTCAGGTGCA              | 12              | 12                      |
| HBB 5.13 | GCATGGTGCACCTGACTCCTG | ACTTCTCCTCAGGAGTCAGGTGCA               | 12              | 14                      |
| HEXAs 1  | GATCCTTCCAGTCAGGGCCAT | ATATCTTATGGCCCTGACTGGAA                | 13              | 14                      |
| HEXAs 2  | GATCCTTCCAGTCAGGGCCAT | TATATCTTATGGCCCTGACTGGAA               | 13              | 15                      |
| HEXAs 3  | GATCCTTCCAGTCAGGGCCAT | GTATATCTTATGGCCCTGACTGGAA              | 13              | 16                      |
| HEXAs 4  | GATCCTTCCAGTCAGGGCCAT | ACCGTATATCTTATGGCCCTGACTGGAA           | 13              | 19                      |
| HEXAs 5  | GATCCTTCCAGTCAGGGCCAT | AACCGTATATCTTATGGCCCTGACTGGAA          | 13              | 20                      |
| HEXAs 6  | GATCCTTCCAGTCAGGGCCAT | GAACCGTATATCTTATGGCCCTGACTGGAA         | 13              | 21                      |
| HEXAs 7  | GATCCTTCCAGTCAGGGCCAT | TGAACCGTATATCTTATGGCCCTGACTGGAA        | 13              | 22                      |
| HEXAs 8  | GATCCTTCCAGTCAGGGCCAT | ATATCTTATGGCCCTGACT                    | 9               | 14                      |
| HEXAs 9  | GATCCTTCCAGTCAGGGCCAT | TATATCTTATGGCCCTGACT                   | 9               | 15                      |
| HEXAs 10 | GATCCTTCCAGTCAGGGCCAT | GTATATCTTATGGCCCTGACT                  | 9               | 16                      |
| HEXAs 11 | GATCCTTCCAGTCAGGGCCAT | ACCGTATATCTTATGGCCCTGACT               | 9               | 19                      |
| HEXAs 12 | GATCCTTCCAGTCAGGGCCAT | AACCGTATATCTTATGGCCCTGACT              | 9               | 20                      |
| HEXAs 13 | GATCCTTCCAGTCAGGGCCAT | GAACCGTATATCTTATGGCCCTGACT             | 9               | 21                      |
| HEXAs 14 | GATCCTTCCAGTCAGGGCCAT | TGAACCGTATATCTTATGGCCCTGACT            | 9               | 22                      |
| HEXAs 15 | GATCCTTCCAGTCAGGGCCAT | TGAACCGTATATCTTATGGCCCTGACT            | 8               | 22                      |
| HEXAs 16 | GATCCTTCCAGTCAGGGCCAT | TGAACCGTATATCTTATGGCCCTGACTG           | 10              | 22                      |
| HEXAs 17 | GATCCTTCCAGTCAGGGCCAT | TGAACCGTATATCTTATGGCCCTGACTGG          | 11              | 22                      |
| HEXAs 18 | GATCCTTCCAGTCAGGGCCAT | TGAACCGTATATCTTATGGCCCTGACTGGA         | 12              | 22                      |
| HEXAs 19 | GATCCTTCCAGTCAGGGCCAT | TGAACCGTATATCTTATGGCCCTGACTGGAA        | 13              | 22                      |
| HEXAs 20 | GATCCTTCCAGTCAGGGCCAT | TGAACCGTATATCTTATGGCCCTGACTGGAA        | 14              | 22                      |
| HEXAs 21 | GATCCTTCCAGTCAGGGCCAT | TGAACCGTATATCTTATGGCCCTGACTGGAA        | 15              | 22                      |
| HEXAs 22 | GATCCTTCCAGTCAGGGCCAT | ACCTGAACCGTATATCTTATGGCCCTGACT         | 9               | 25                      |
| HEXAs 23 | GATCCTTCCAGTCAGGGCCAT | TACCTGAACCGTATATCTTATGGCCCTGACT        | 9               | 26                      |
| HEXAs 24 | GATCCTTCCAGTCAGGGCCAT | GTACCTGAACCGTATATCTTATGGCCCTGACT       | 9               | 27                      |
| HEXAs 25 | GATCCTTCCAGTCAGGGCCAT | GGTACCTGAACCGTATATCTTATGGCCCTGACT      | 9               | 28                      |
| HEXAs 26 | GATCCTTCCAGTCAGGGCCAT | TGGTACCTGAACCGTATATCTTATGGCCCTGACT     | 9               | 29                      |
| HEXA 5   | GATCCTTCCAGTCAGGGCCAT | ACCTGAACCGTATATCTTATGGCCCTGACTGGAA     | 13              | 21                      |
| HEXA 6   | GATCCTTCCAGTCAGGGCCAT | ACCGTATATCTTATGGCCCTGACTGGAA           | 13              | 15                      |
| HEXA 7   | GATCCTTCCAGTCAGGGCCAT | ACCTGAACCGTATATCTTATGGCCCTGACTGGAAGG   | 15              | 21                      |
| HEXA 8   | GATCCTTCCAGTCAGGGCCAT | ACCTGAACCGTATATCTTATGGCCCTGACTGGAAG    | 14              | 21                      |
| HEXA 9   | GATCCTTCCAGTCAGGGCCAT | ACCTGAACCGTATATCTTATGGCCCTGACTGGA      | 12              | 21                      |
| HEXA 10  | GATCCTTCCAGTCAGGGCCAT | ACCTGAACCGTATATCTTATGGCCCTGACTGG       | 11              | 21                      |
| HEXA 11  | GATCCTTCCAGTCAGGGCCAT | ACCTGAACCGTATATCTTATGGCCCTGACTG        | 10              | 21                      |
| HEXA 12  | GATCCTTCCAGTCAGGGCCAT | AACCGTATATCTTATGGCCCTGACTGGAA          | 13              | 16                      |
| HEXA 13  | GATCCTTCCAGTCAGGGCCAT | TGAACCGTATATCTTATGGCCCTGACTGGAA        | 13              | 18                      |
| HEXA 14  | GATCCTTCCAGTCAGGGCCAT | TACCTGAACCGTATATCTTATGGCCCTGACTGGAA    | 13              | 22                      |
| HEXA 15  | GATCCTTCCAGTCAGGGCCAT | TGGTACCTGAACCGTATATCTTATGGCCCTGACTGGAA | 13              | 25                      |
| HEXA 16  | GATCCTTCCAGTCAGGGCCAT | GTACCTGAACCGTATATCTTATGGCCCTGACTGGAA   | 13              | 23                      |
| HEXA 17  | GATCCTTCCAGTCAGGGCCAT | AACCGTATATCTTATGGCCCTGACTG             | 10              | 16                      |
| HEXA 18  | GATCCTTCCAGTCAGGGCCAT | TGAACCGTATATCTTATGGCCCTGACTG           | 10              | 18                      |
| HEXA 19  | GATCCTTCCAGTCAGGGCCAT | TACCTGAACCGTATATCTTATGGCCCTGACTG       | 10              | 22                      |
| HEXA 20  | GATCCTTCCAGTCAGGGCCAT | TGGTACCTGAACCGTATATCTTATGGCCCTGACTG    | 10              | 25                      |
| HEXA 21  | GATCCTTCCAGTCAGGGCCAT | TGAACCGTATATCTTATGGCCCTGACTGGAAG       | 15              | 18                      |

| nicking sgRNA                 | spacer sequence       |
|-------------------------------|-----------------------|
| HBB_ED9a_+72                  | GCCTTGATACCAACCTGCCCA |
| HBB_ED9a+95 (for HBB 3.5)     | GGGCTGGGCATAAAAGTCA   |
| HEXA_ED9b_+60                 | GCTGGAAGTGGTCACCAAGGC |
| HEXA_ED9b_correct_wt_PE3b     | GTACCTGAACCGTATATCCTA |
| HEXA_ED9b_correct_silent_PE3b | GTACCTGAACCGTATATCTTA |

Extended Data Figure 10 sequences:

| <b>pegRNA</b>             | <b>spacer sequence</b> | <b>3' extension</b>                                                  | <b>PBS length (nt)</b> | <b>RT template length (nt)</b> |
|---------------------------|------------------------|----------------------------------------------------------------------|------------------------|--------------------------------|
| HEK3_ED10_2GtoC           | GGCCCAGACTGAGCACGTGA   | TCTGCCATGACGTGCTCAGTCTG                                              | 13                     | 10                             |
| EMX1_ED10_1GtoC           | GAGTCCGAGCAGAAGAAGAA   | GTGATGGGAGCCCTTGTTCCTGCTCGG                                          | 13                     | 16                             |
| FANCF_ED10_5GtoT          | GGAATCCC'TTCTGCAGCACC  | GGAAAAGCGATCAAGGTGCTGCAGAAGGGA                                       | 13                     | 17                             |
| HEK3_ED10_1His6ins        | GGCCCAGACTGAGCACGTGA   | TGGAGGAAGCAGGGCTTCCTTTCTCTGCCATCAATGATGGT<br>GATGATGGTGCGTGCTCAGTCTG | 13                     | 52                             |
| *HEK3_ED10_5GtoT          | GGCCCAGACTGAGCACGTGA   | TCTGCAATCACGTGCTCAGTCTG                                              | 13                     | 10                             |
| *HEK3_ED10_1CTTins        | GGCCCAGACTGAGCACGTGA   | TCTGCCATCAAAGCGTGCTCAGTCTG                                           | 13                     | 10                             |
| *HEK3_ED10_1TtoG          | GGCCCAGACTGAGCACGTGA   | TCTGCCATCCCGTGCTCAGTCTG                                              | 13                     | 10                             |
| *HEK3_ED10_3AtoC          | GGCCCAGACTGAGCACGTGA   | TCTGCCAGCACGTGCTCAGTCTG                                              | 13                     | 10                             |
| *HEK3_ED10_3AtoT          | GGCCCAGACTGAGCACGTGA   | TCTGCCAACACGTGCTCAGTCTG                                              | 13                     | 10                             |
| HEK3_ED10_3AtoT_5-6GGtoTT | GGCCCAGACTGAGCACGTGA   | TGGAGGAAGCAGGGCTTCCTTTCTCTGAAAACACGTGCTCA<br>GTCTG                   | 13                     | 34                             |
| RNF2_ED10_1CtoA           | GTCATCTTAGTCATTACCTG   | AACGAACACCTCATGTAATGACTAAGATG                                        | 15                     | 14                             |
| RNF2_ED10_1CtoG           | GTCATCTTAGTCATTACCTG   | AACGAACACCTCACGTAATGACTAAGATG                                        | 15                     | 14                             |
| RNF2_ED10_1GTAINS         | GTCATCTTAGTCATTACCTG   | AACGAACACCTCAGTACGTAATGACTAAGATG                                     | 15                     | 17                             |
| HBB_ED10_4AtoT            | GCATGGTGCACCTGACTCCTG  | AGACTTCTCCACAGGAGTCAGGTGCAC                                          | 13                     | 14                             |
| PRNP_ED10_6GtoT           | GCAGTGGTGGGGGCCTTGG    | ATGTAGACGCCAAGGCCCCACC                                               | 12                     | 12                             |



**Supplementary Table 4. Sequences of primers used for mammalian cell genomic DNA amplification and HTS<sup>30</sup>.**

| Description                 | Sequence                                                        |
|-----------------------------|-----------------------------------------------------------------|
| HEK3 fwd                    | ACACTCTTTCCCTACACGACGCTCTTCCGATCTNNNNATGTGGGCTGCCTAGAAAGG       |
| HEK3 rev                    | TGGAGTTCAGACGTGTGCTCTTCCGATCTCCAGCAAACCTGTCAACC                 |
| RNF2 fwd                    | ACACTCTTTCCCTACACGACGCTCTTCCGATCTNNNNACGCTCATATGCCCTTGG         |
| RNF2 rev                    | TGGAGTTCAGACGTGTGCTCTTCCGATCTACGTAGGAATTTGGTGGGACA              |
| HEK4 fwd                    | ACACTCTTTCCCTACACGACGCTCTTCCGATCTNNNNGAACCCAGGTAGCCAGAGAC       |
| HEK4 rev                    | TGGAGTTCAGACGTGTGCTCTTCCGATCTTCTTTCAACCCGAACGGAG                |
| EMX1 fwd                    | ACACTCTTTCCCTACACGACGCTCTTCCGATCTNNNNCAGCTCAGCCTGAGTGTGA        |
| EMX1 rev                    | TGGAGTTCAGACGTGTGCTCTTCCGATCTCTCGTGGGTTTGTGGTTGC                |
| FANCF fwd                   | ACACTCTTTCCCTACACGACGCTCTTCCGATCTNNNNCAATGCGAGAGAGCGTATCA       |
| FANCF rev                   | TGGAGTTCAGACGTGTGCTCTTCCGATCTGGGGTCCAGGTGCTGAC                  |
| HBB fwd                     | ACACTCTTTCCCTACACGACGCTCTTCCGATCTNNNNAGGGTTGGCCAATCTACTCCC      |
| HBB rev                     | TGGAGTTCAGACGTGTGCTCTTCCGATCTGTCTTCTGTCTCCACATGCC               |
| PRNP fwd                    | ACACTCTTTCCCTACACGACGCTCTTCCGATCTNNNNGTCACTGGAAACAAGCCGAGT      |
| PRNP rev                    | TGGAGTTCAGACGTGTGCTCTTCCGATCTACTTGGTTGGGGTAACGGTG               |
| HEXA fwd                    | ACACTCTTTCCCTACACGACGCTCTTCCGATCTNNNNCATACAGGTGTGGCGAGAGG       |
| HEXA rev                    | TGGAGTTCAGACGTGTGCTCTTCCGATCTCCAGCCTCCTTTGGTTAGCA               |
| RUNX1 fwd                   | ACACTCTTTCCCTACACGACGCTCTTCCGATCTNNNNCACAAACAAGACAGGGAAGT       |
| RUNX1 rev                   | TGGAGTTCAGACGTGTGCTCTTCCGATCTAGATGTAGGGGTAGAGGGGTG              |
| VEGFA fwd                   | ACACTCTTTCCCTACACGACGCTCTTCCGATCTNNNNACTTGGTGCCTAATCTTCTCC      |
| VEGFA rev                   | TGGAGTTCAGACGTGTGCTCTTCCGATCTAAAGAGGGAATGGGCTTTGGA              |
| DNMT fwd                    | ACACTCTTTCCCTACACGACGCTCTTCCGATCTNNNNCACAACAGCTTCTATGTCAGCC     |
| DNMT rev                    | TGGAGTTCAGACGTGTGCTCTTCCGATCTACGTTAATGTTTCTCTGATGGTCC           |
| HEK3 off-target site 1 fwd  | ACACTCTTTCCCTACACGACGCTCTTCCGATCTNNNNTCCCCTGTTGACCTGGAGAA       |
| HEK3 off-target site 1 rev  | TGGAGTTCAGACGTGTGCTCTTCCGATCTCACTGTACTTGCCCTGACCA               |
| HEK3 off-target site 2 fwd  | ACACTCTTTCCCTACACGACGCTCTTCCGATCTNNNNTTGGTGTGACAGGGAGCAA        |
| HEK3 off-target site 2 rev  | TGGAGTTCAGACGTGTGCTCTTCCGATCTCTGAGATGTGGGCAGAAGGG               |
| HEK3 off-target site 3 fwd  | ACACTCTTTCCCTACACGACGCTCTTCCGATCTNNNNTGAGAGGGAACAGAAGGGCT       |
| HEK3 off-target site 3 rev  | TGGAGTTCAGACGTGTGCTCTTCCGATCTGTCCAAAGGCCAAGAACCT                |
| HEK3 off-target site 4 fwd  | ACACTCTTTCCCTACACGACGCTCTTCCGATCTNNNNTCCTAGACTTTGGAAGGTCG       |
| HEK3 off-target site 4 rev  | TGGAGTTCAGACGTGTGCTCTTCCGATCTGTCTCATCTTAATCTGCTCAGCC            |
| HEK4 off-target site 1 fwd  | ACACTCTTTCCCTACACGACGCTCTTCCGATCTNNNNGGCATGGCTTCTGAGACTCA       |
| HEK4 off-target site 1 rev  | TGGAGTTCAGACGTGTGCTCTTCCGATCTGTCTCCCTTGCACTCCCTGTCTTT           |
| HEK4 off-target site 2 fwd  | ACACTCTTTCCCTACACGACGCTCTTCCGATCTNNNNTTGGCAATGGAGGCATTTGG       |
| HEK4 off-target site 2 rev  | TGGAGTTCAGACGTGTGCTCTTCCGATCTGAAGAGGCTGCCATGAGAG                |
| HEK4 off-target site 3 fwd  | ACACTCTTTCCCTACACGACGCTCTTCCGATCTNNNNGGTCTGAGGCTCGAATCCTG       |
| HEK4 off-target site 3 rev  | TGGAGTTCAGACGTGTGCTCTTCCGATCTCTGTGGCCTCCATATCCCTG               |
| HEK4 off-target site 4 fwd  | ACACTCTTTCCCTACACGACGCTCTTCCGATCTNNNNTTCCACCAGAACTCAGCCC        |
| HEK4 off-target site 4 rev  | TGGAGTTCAGACGTGTGCTCTTCCGATCTCCTCGGTTCTCCACAACAC                |
| EMX1 off-target site 1 fwd  | ACACTCTTTCCCTACACGACGCTCTTCCGATCTNNNNGTGGGGAGATTTGTCATCTGTGGAGG |
| EMX1 off-target site 1 rev  | TGGAGTTCAGACGTGTGCTCTTCCGATCTGCTTTTATACCATCTTGGGGTTACAG         |
| EMX1 off-target site 2 fwd  | ACACTCTTTCCCTACACGACGCTCTTCCGATCTNNNNCAATGTGTCTCAACCCATCACGGC   |
| EMX1 off-target site 2 rev  | TGGAGTTCAGACGTGTGCTCTTCCGATCTCCATGAATTTGTGATGGATGCACTCTG        |
| EMX1 off-target site 3 fwd  | ACACTCTTTCCCTACACGACGCTCTTCCGATCTNNNNGAGAAGGAGGTGCAGGAGCTAGAC   |
| EMX1 off-target site 3 rev  | TGGAGTTCAGACGTGTGCTCTTCCGATCTCATCCCAGCTTCTATCCCTCCTGG           |
| EMX1 off-target site 4 fwd  | ACACTCTTTCCCTACACGACGCTCTTCCGATCTNNNNGTAGTTCTGACATTCCTCCTGAGGG  |
| EMX1 off-target site 4 rev  | TGGAGTTCAGACGTGTGCTCTTCCGATCTTCAAACAAGGTGCAGATACAGCA            |
| FANCF off-target site 1 fwd | ACACTCTTTCCCTACACGACGCTCTTCCGATCTNNNNGCGGGCAGTGGCGTCTTAGTCCG    |
| FANCF off-target site 1 rev | TGGAGTTCAGACGTGTGCTCTTCCGATCTCCTGGGTTTGGTTGGCTGCTC              |
| FANCF off-target site 2 fwd | ACACTCTTTCCCTACACGACGCTCTTCCGATCTNNNNCTCCTTGCCGCCAGCCGGTCC      |
| FANCF off-target site 2 rev | TGGAGTTCAGACGTGTGCTCTTCCGATCTCACTGGGGAAGAGGCGAGGACAC            |
| FANCF off-target site 3 fwd | ACACTCTTTCCCTACACGACGCTCTTCCGATCTNNNNCCAGTGTTCCTATCCCCAACAC     |
| FANCF off-target site 3 rev | TGGAGTTCAGACGTGTGCTCTTCCGATCTGAATGGATCCCCCCTAGAGCTC             |
| FANCF off-target site 4 fwd | ACACTCTTTCCCTACACGACGCTCTTCCGATCTNNNNCAGGCCACAGGTCCTTCTGGA      |

**Supplementary Table 5.** Sequences of 100-mer single-stranded DNA oligonucleotide donor templates used in HDR experiments and in the creation of the *HBB* E6V HEK293T cell line. Oligonucleotides are 100-103 nt in length with homology arms centered around the site of the edit. Oligonucleotides were from Integrated DNA Technologies, purified by PAGE.

*HEK3* +3 A to T:

GCTTCTCCAGCCCTGGCCTGGGTCAATCCTTGGGGCCCAGACTGAGCACGTGTTGGCAGAGGAAAGGAAGCC  
CTGCTTCTCCAGAGGGCGTTCGCAGGAC

*HEK3* +3 A to T, +5,6 GG to TT:

GCTTCTCCAGCCCTGGCCTGGGTCAATCCTTGGGGCCCAGACTGAGCACGTGTTTTTCAGAGGAAAGGAAGCC  
CTGCTTCTCCAGAGGGCGTTCGCAGGAC

*HEK3* +1 T to G:

GCTTCTCCAGCCCTGGCCTGGGTCAATCCTTGGGGCCCAGACTGAGCACGGGATGGCAGAGGAAAGGAAGCC  
CTGCTTCTCCAGAGGGCGTTCGCAGGAC

*HEK3* +3 A to C:

GCTTCTCCAGCCCTGGCCTGGGTCAATCCTTGGGGCCCAGACTGAGCACGTGCTGGCAGAGGAAAGGAAGCC  
CTGCTTCTCCAGAGGGCGTTCGCAGGAC

*HEK3* +1 CTT insertion:

GCTTCTCCAGCCCTGGCCTGGGTCAATCCTTGGGGCCCAGACTGAGCACGCTTTGATGGCAGAGGAAAGGAA  
GCCCTGCTTCTCCAGAGGGCGTTCGCAGGAC

*RNF2* +1 C to A:

CCCAGTTTACACGTCTCATATGCCCCTTGGCAGTCATCTTAGTCATTACATGAGGTGTTTCGTTGTAACCTCATATA  
AACTGAGTTCCCATGTTTTGCTTAA

*RNF2* +1 C to G:

CCCAGTTTACACGTCTCATATGCCCCTTGGCAGTCATCTTAGTCATTACGTGAGGTGTTTCGTTGTAACCTCATATA  
AACTGAGTTCCCATGTTTTGCTTAA

*RNF2* +1 GTA insertion:

CAGTTTACACGTCTCATATGCCCCTTGGCAGTCATCTTAGTCATTACGTACTGAGGTGTTTCGTTGTAACCTCATAT  
AACTGAGTTCCCATGTTTTGCTTAA

*HBB* E6V installation (also used for creation of the *HBB* E6V HEK293T cell line):

ACTTCATCCACGTTACCTTGCCCCACAGGGCAGTAACGGCAGACTTCTCCACAGGAGTCAGATGCACCATGG  
TGTCTGTTTGAGGTTGCTAGTGAACAC

*HBB* E6V correction protospacer A:

ACTTCATCCACGTTACCTTGCCCCACAGGGCAGTAACGGCAGACTTCTCCTCAGGAGTCAGGTGCACCATGG  
TGTCTGTTTGAGGTTGCTAGTGAACAC

*HBB* E6V correction protospacer B:

GTGTTCACTAGCAACCTCAAACAGACACCATGGTGCACCTGACTCCTGAGGAGAAGTCTGCCGTTACTGCCCT  
GTGGGGCAAGGTGAACGTGGATGAAGT

*HBB* E6V correction protospacer B, silent PAM mutation:

GTGTTCACTAGCAACCTCAAACAGACACCATGGTGCACCTGACTCCTGATGAGAAGTCTGCCGTTACTGCCCT  
GTGGGGCAAGGTGAACGTGGATGAAGT

*PRNP* G127V:

CACATGGCTGGTGTGCTGCAGCAGCTGGGGCAGTGGTGGGGGGCCTTGGCGTCTACATGCTGGGAAGTGCCAT  
GAGCAGGCCCATCATACATTTCCGGCAGTG







ACAGCACCTAACAAAACGGCATCAACCTTCTTGGAGGCTTCCAGCGCCTCATCTGGAAGTGGGACACCTGTAGCATCGATAGCAGCACCACCAATTAATGATTTTCGAAAT  
CGAACTTGACATTGGAACGAACATCAGAAAATAGCTTTAAGAACCTTAATGGCTTCGGCTGTGATTTCTTGACCAACGTGGTACCTGGCAAAACGACGATCTTCTTAGGGGC  
AGACATAGGGGCAGACATTAGAATGGTATATCCTTGAATAATATATATATATATGCTGAAATGTAAAAGGTAAGAAAAGTTAGAAAAGTAAGACGATTGCTAACCACCTATTGG  
AAAAACAATAGGTCTTAAATAATATTGTCAACTTCAAGTATTGTGATGCAAGCATTTAGTCATGAACGCTTCTCTATTCTATATGAAAAGCCGGTTCGGCCCTCTCACCT  
TTCCTTTTCTCCCAATTTTTCAGTTGAAAAAGGTATATGCGTCAGGCGACCTCTGAAATTAACAAAAAATTTCCAGTCATCGAATTTGATTTCTGTGGATAGCGCCCTGT  
GTGTTCTCGTTATGTTGAGGAAAAAATAATGGTTGCTAAGAGATTGCAACTCTTGCATCTTACGATACCTGAGTATTTCCACAGTTAACTGCGGTCAAGATATTTCTTGAA  
TCAGGCGCTTAGACCGCTCGGCCAAACAACCAATTACTTGTGAGAAATAGAGTATAAATTAACCTATAAAATAAACGTTTTTGAACACACATGAAACAAGGAGTACAGGAC  
AATTGATTTTGAAGAGAAATGTGGATTTTGTATGTAATTTGTTGGGATTCCATTTTTAATAAGGCAATAAATATTAGGTATGTGGATATACTAGAAAGTTCTCCTCGACCGTCGATA  
TGCGGTGTGAAATACCGCACAGATGCGTAAGGAGAAAAATACCGCATCAGGAAATTTGTAACGTTAAATATTTTGTAAATTTTGTAAATCAGCTCATT  
TTTAACCAATAGGCCGAAATCGGCAAAATCCCTTATAAATCAAAGAATAGACCGAGATAGGGTTGAGTGTGTTCCAGTTTGAACAAGAGTCCACTATTAAGAACGTTG  
ACTCCAACGTCAAAGGGCGAAAAACCGTCTATCAGGGCGATGGCCCACTACGTGAACCATCACCTAATCAAGTTTTTGGGGTTCGAGGTGCCGTAAGCACTAAATCGGAA  
CCCTAAAGGGAGCCCGGATTTAGAGCTTGACGGGAAAGCCGGCGAACGTTGGCGAGAAAGGAAGGGAAGAAAGCGAAAGGAGCGGGCGCTAGGGCGCTGGCAAGTGTAGCG  
GTCACGCTGCGCGTAACCACCACACCCGCCGCTTAATGCGCCGCTACAGGGCGCGTCGCGCCATTTCGCCATTTCAGGCTGCGCAACTGTTGGGAAGGGCGATCGGTGCGGG  
CCTCTTCGCTATTACGCCAGCTGGCGAAAGGGGGATGTGCTGCAAGGCGATTAAAGTTGGGTAAACGCCAGGGTTTTCCAGTCACGACGTTGTAAAACGACGGCCAGTGAGCG  
CGCGTAATACGACTCACTATAGGGCGAATTGGGTACCGGGCCCCCCTCGAGGTCGACGGTATCGATAAGCTTGATATCGAATTCCTGCAGCCGGGGATCCGTTAGAATC  
ATTTTGAATAAAAACACGCTTTTTTCAGTTTCGAGTTTATCATTATCAATACTGCCATTTCAAAGAATACGTAATAATAATAGTAGTGATTTTCTTAACCTTTATTTAGTCA  
AAAAATTAGCCTTTAATTTCTGTGTAAACCCGTACATGCCAAAATAGGGGGCGGGTTACACAGAAATATAACATCGTAGGTGTCTGGGTGAACAGTTTATCTCTGGCATC  
CACTAAATATAATGGAGCCCGCTTTTTAAGCTGGCATCCAGAAAAAAAAGAAATCCAGCACAAAATATTGTTTTCTTACCAACCATCAGTTTCATAGGTCCATTCTTTA  
GCGCAACTACAGAGAACAGGGGCACAAAACAGGCAAAAACGGGCACAACTCAATGGAGTGATGCAACCTGCCTGGAGTAAATGATGACACAAGGCAATTGACCCACGCGATG  
TATCTATCTCATTTTCTTACACCTTCTATTACCTTCTGCTCTCTGTATTTGGAAAAAGCTGAAAAAAAAGGTTGAAACCAGTTCCCTGAAATTTATCCCTACTTGACTAA  
TAAGTATATAAAGACGGTAGGTATTGATTTGTAATCTGTAAATCTATTTCTTAAACTTCTTAAATTTACTTTTATAGTTAGTCTTTTTTTTTAGTTTTTAAACACCAAGAAC  
TTAGTTTCGAATAAACACACATAAACAAACAAGAATTC

GFP open reading frame

Linker containing stop codon +1 frameshift, or -1 frameshift

mCherry open reading frame

Plasmid backbone (containing the GPD promoter, Leu2 marker, and AmpR)

Protospacer (underlined)

**PAM (boldfaced)**

Supplementary Sequences 2. DNA sequences of mammalian prime editor plasmids and example pegRNA plasmid

pCMV-PE1:

ATGAAACGGACAGCCGACGGAAGCGAGTTCAGTACACCAAGAAGAAGCGGAAAGTCGACAAGAAGTACAGCATCGGCCTGGACATCGGCACCAACTCTGTGGGCTGGGCCG  
TGATACCCGACGAGTACAAGGTGCCAGCAAGAAATTCAGAGTGTGGGCAACACCGACCGGCACAGCATCAAGAAGAACCTGATCGGAGCCCTGCTGTTTCGACAGCGCGCA  
AACAGCCGAGGCCACCCGGTGAAGAGAACCAGCAGAAAGATACACACAGGAAAGAACCGGATCTGCTATCTGCAAGAGATCTTACAGAACGAGATGGCCAAAGTGGAC  
GACAGCTTCTCCACAGACTGGAAGAGTCTTCTGTTGGAAAGAGGATAAGAACACAGGCGGCACCCCATCTTCGGCAACATCTGTGGACGAGGTGGCCATACCACGAGAAGT  
ACCCACCATCTACCACCTGAGAAAGAACTGGTGGACAGCACCGACAAGGCCACCTGCGGTGATCTATCTGGCCCTGGCCACATGATCAAGTTCGGGGCCACTTCTCT  
GATCGAGGGCGACCTGAACCCAGCAGCAGCTGGACAGCTGTTTCACTCAGCTGGTGGCAGACTTACACAGCTGTTTCGAGGAAACCCCATCAACGCGAGCGGCTG  
GACGCAAGGCCATCTGTCTGCCAGACTGAGCAAGAGCAGAGCGGTGGAAAATCTGATCGCCAGCTGCCCGGCGAGAAGAATGGCTGTTTCGAAAACCTGTTCGAACTGTATGGCC  
TGAGCCTGGGCTGACCCCAACTTCAAGAGCAACTTCGACCTGGCCGAGGATGCCAAACTGCAGTGTAGCAAGGACACTACGACGACACTGGACAACCTGTGGCCCA  
GATCGGCGACAGTACGCGGACCTGTTTCTGGCGCCAAAGAAGCTGTCCGACGCCATCTGCTGAGGACATCTGAGAGTGAACACCGAGATACCAAGGCCCCCTGAGC  
GCCTCTATGATCAAGAGATACGACGAGCACCACAGGACCTGACCTGCTGAAAGCTCTGCTGCGGACGACGCTGCCTGAGAAGTACAAGAGATTTTCTTCGACAGAGCA  
AGAACGGCTACGCGGCTACATGTAGCGCGAAGCCAGCCAGGAAGTTCACCGTGTAAACAGCTGATCACAAGTGAATATAGTACCAGGGAATGGAAAGCCGCTTCTGAGC  
GAACAGAGAGGACCTGCTGCGGAAGCAGCGGACCTTCGACAACGGCAGCATCCCCACAGATCCACCTGGGAGAGCTGCAGGCCATCTGCGGGCGGAGGAAGATTTTAC  
CCATTCTGAAGGACAACCGGAAAAGATCGAGAAGATCTTACCTCCGCATCCCTACTACGTGGGCCCCTGAGCAGGGGAAACAGCAGATTCGCTGGATGACCAGAA  
AGAGCGAGAAACCATCACCCCTGGAATTCGAGGAAAGTGGTGGACAAGGGCGCTTCGCCCAGAGCTTACGAGCGGATGACCAACTTCGATAAGAACCTGCCAACGA  
GAAGGCTACGCGGCTGAGCGGAGCTGTACGAGTACTTACCCTGTTACCGTGTAAACAGCTGATCACAAGTGAATATAGTACCAGGGAATGGAAAGCCGCTTCTGAGC  
GAGCAGAAAAGGCCATCTGTGGACCTGCTTCAAGACCAACCGGAAAGTACCGTGAAGCAGCTGAAAGAGGACTACTTCAAGAAAATCGAGTGTTCGACTCCGTGAAA  
TCTCCGGCGTGAAGATCGGTTCAACGCTCCCTGGGCACATACCAGCATCTGCTGAAAATTTACAGGACAAGGACTTCCCTGGACATGAGGAAAACGAGGACATTCGGA  
AGATATCGTGTGACCTGACTGTTTGGAGCAGAGAGATGATCGAGGACCGCTGAAAACCTATGCCACCTGTTTCGACGACAAGTGAAGCAGCTGAAGCGGGCG  
AGATACACCGGCTGGGGGAGCTGTAGCGGAAAGCTGTCAACGGCATCCGGGCAAGAGCTCCGGCAGAGCAATCTTGATTTCTGAAAGTCCGACGCGCTTCTGCAAGCA  
ACTTCATGAGCTGATCCAGCAGCAGCTGACTTTAAAGAGGACATCCAGAAAGCCAGGTGTCCGGCCAGGGCGATAGCCTGCACGAGCATTGCCAATCTGGCCG  
CAGCCCCGCAATTAAGAGGGGACTCCTGACGACAGTGAAGTGGTGGACAGCTGCTGAAAGTGTAGGGCCGCAAGCCGAGAACCTGATGCGAAATGGCCAGAGAG  
AACCAGACCACCCAGAAGGACAGAAAGACGCCGAGAAATGAAGCGGATCGAAGGCTCAAAAGGCTGAGGACCTGAGGACCTGAGGACCTGAGGACCTGAGGAAAC  
CCAGCTCGAGAAGCAGAGAGCTGTACTGTACTACTTCCAGAAAGTGGCGGGATATGTAGCTGGACCAAGCAATGAGCAATCAACCCGCTGTCCAGACTACGAT  
CGTGCCTCAGAGCTTCTGAAAGGACCTCATCGACAACAAGGTGCTGACCAAGGCGACAAGAACCGGGCAGAGCGACAACGTGCCCTCCGAGAGGCTGTGAAAG  
ATGAAGAATACTGGCGGACGTGCTGAACCGCAAGCTGATTAACCCAGAGAAGTTCGACAATCTGCACAAGGCCGAGAGAGCGCCGCTGAGCGAATGGTAAAGCCGGT  
TCATCAAGAGACAGCTGAGTGGAGGATCAAAAGCAGTGCACACTGGCAGACACTTCCGACTCCGACTGACACTTAAGTACGACGAGATGACAAGTGTATCGGGAAT  
GAAAGTGTACCCCTGAAAGTCCAAGCTGGTGTCCGATTTCCGGAAGGATTTCCAGTTTACAAAGTGGCGGAGATCAACAACCTACCACCAGCCACGACGCTACCTGAAC  
GCCGTCTGGAAACCGCCCTGATCAAAAAGTACCCTAAGCTGGAAAGCGAGTTCGTTGACGGCGACTACAAGTGTACGACGTCGCGAAGATGATCGCAAGAGCGAGCAGG  
AAATCGGCAAGGCTACCGCAAGTACTTCTTACAGCAACATCATGAACTTTTCAAGCCGAGATTAACCTGGCCAAAGCGGAGATCCGGAAGCGGCTGATCGAGAC  
AAACCGGAAACCGGGAGCTGTGTTGGATAAGGGCCGGGATTTTGGCCACCTGCGGAAAGTGTAGCATTCTGACACTGGCCAGGCAATCTGAGAAAGTCAAGGCTGACAGCA  
GGCGGCTTACGAAAAGTCTATCTGCCAAAGAGGACAGCGATAAGCTGATCGCCAGAAGAAGGACTGGGACCTTAAGAAGTACGGGGCTTCGACAGCCCCACCGTGG  
CCTATTCTGTGCTGGTGTGGCCAAAGTGGAAAAGGGCAAGTCCAAGAACTGAAGAGTGTGAAAGAGCTGCTGGGGATCACCATCATGGAAGAAGAGCAGCTTCGAGAAGAA  
TCCCACGACTTTCGGAAGCCAAGGGCTACAAAAGAGTAAAAAGGACCTGATCATCAAGCTGCCAAGTACTCCCTGTTCGAGCTGGAAGAACCGCCGGAAGAGAATGCTG  
GCCTCTGCCGGCAACTGCAGAAGGAAACGAACTGGCCCTGCCCTCCAAATATGTGAACCTTCTGTACTGGCCAGCCATATGAGAAGCTGAAGGGCTCCCCGAGGATA  
ATGAGCAGAAACAGCTGTTTGTGAACAGCACAAGCTACCTGGACGAGATCATCGAGCAGTACGCGAGTTCCTCAAGAGAGTGTCTGGCCGACGCTAATCTGGACAA  
AGTGTCTCCGCTTACAACAAGCAGCGGATAAGCCCATCAGAGAGGAGGCGAGAATATCATCCACTGTTTACCCTGACCAATCTGGGAGCCCTGCCGCTTCAAGTAC  
TTTGACACCACCTACCGGAAAGGTTACACCAGCAACCAAGAGGTTGGACGCCCTGATCCACCAGAGCATCACCGGCTGTACGAGACCGGATCGACTGCTGCTC  
AGCTGGAGGACTCTGAGGAGTCTAGCGGAGGATCTCTGGCGAGGACACAGGAACAGCGGAGCTGAGCAACAGCGAGTCAAGCAACAGGAGCGGCGAGCAGCGG  
CACCCATAATATAAGAATGAGTATCGGCTACATGAGACCTCAAAGAGCCAGATGTTTCTTAGGTCACATGGCTGTCTGATTTTCTCAGGCTGGCGGAACCGGG  
GGCATGGGACTGCGAGTTCGCCAAGCTCCTCTGATCATACCTTGAAGACAACCTTACCCTCGTCCATAAACAATACCCCATCATCAGAAGACCGAGCTGGGGATCA  
AGCCCCACATACGAGACTGTTGGACAGGGAATCTGGTACCCTGCCAGTCCCTTGAACAACCGCCCTGTACCTTAAAGAACCGGACCTAAGTATAGCCCTGT  
CCAGGATCTGAGAGAGTCAACAAAGCGGGTGAAGACATCCACCCACCGTGGCCCAACCTTTACAACCTCTTGGAGCGGCTCCACCGTCCACAGTGGTACACTGTGCTT  
GATTTAAAGGATGCCTTTTCTGCTGAGACTCCACCCACCAGTACGCTCTTCTGCTTTGAGTGGAGAGATCCAGAGATGGGAATCTCAGGACAATTGACTGGACCA  
GACTCCCAAGGGTTTTCAAAAACCTGCCACCTGTTTGTATGAGACTGACAGAGACTGCACAGACTCCGAGACTCCGAGTCCGAGTCCGACTGATCTGCTACAGTACGATGGA  
TGACTTACTGTGGCCGACTTCTGTAGCTAGCTGCCAAGGACTCGGGCTGTTTACAACCTTAGGAACTCGGGTATCGGGCTTCGGCCCTGCAAGAAAGCCAAAT  
TGCAGAAACAGTCAAGTATCTGGGGTACTTCTAATAAGAGGCTCAGAGATGGTGTGACTGAGGCCAGAAAAGAGACTGTGATGGGGCAGCCACTCCGAAAGCCCTCGAC  
AATTAAGGGATTCCTAGGGACGGCAGCTTCTGTCGCTCTGGATCCCTGGGTTTGCAGAAATGGCAGCCCCCTGTACCCTCTCACCAAAACGGGACTCTGTTTAAATG  
GGCCACAGACAAAAGGCTTATCAAGAAATCAAGCAAGCTCTTCAACTCCGCCAGCTGGGGTTGCCAGATTTGACTAAGCCCTTGAACCTTGTGTGCGACAGAGA  
GAGGCTACGCCAAAGGTGCTCCTAACCAAAAAGTGGACTTTGGCTGCGGCGGTGCCCTTGGTTCAAAAGACTAGACCAGTACGAGCTGGGTTGGCCCTTGGCTAC  
GGATGGTAGCAGCATTGCCGTACTGACAAAAGGATGCAAGGCAAGCTAACCTGGGACAGCCACTAGTCAATCTGGCCCCCATGACGATAGAGGCACTAGTCAAACAACCC  
CGACCGCTGGCTTTCACAGCCCGGATGACTCACTATCAGGCTTGTCTTTGGACACGGACGGGTCAGTTCGGACCGGTGTAGCCCTGAACCCGCTACGCTGTCCCA  
CTGCTGAGGAAGGGTGAACAACAAGTGCCTTGATATCTGGCCAGGCCAGCCAGCCAGCTAACCGACCGCCGCTCCGAGCGCGGACACACTGGTATCA  
CGGATGGAAGCAGTCTCTTACAAGAGGAGCAGCTAAGCGGGAGCTGCGGTGATCAGCAGCCGAGGTAATCTGGCTAAGGCCCTGCCAGCCGGACATCCGCTCAGC  
GGCTGAATGATAGCACTACCCAGGCCCTAAAGATGGCAGAAGGTAAGAAGTAAATGTTTATACTGATAGCCGTTATGCTTTTGTACTGCCCATATCCATGGAGAATA  
TACAGAAGCGTGGGTTGCTCAGATCAGAAGGCAAGAGATCAAAAATAAAGACGAGATCTTGGCCCTACTAAAAGCCCTCTTCTGCCAAAAGACTTAGCATAATCCAT  
GTCCAGGACATCAAAAGGACACAGCGCCGAGGCTAGAGGCAACCCGATGGCTGACCAAGCGGCGGAAAGGACGACATCACAGAGCTCCAGACCTTACCTCTCAT  
AGAAAATTCATACCTCTGGCGCTCAAAAAGAACCGCCGAGCGGCAATTCGAGCCCAAGAAAGAGGAAAGTCTAACCGGTATCATCATCACATCACCATTGAGTTT  
AAACCCGCTGATCAGCTGACTGTGCCTTCTAGTTGCCAGCCTCTGTTGTTTGGCCCTCCCGCTGCCCTTCTTGGACCTGGAAGGTGCCACTCCACTGTCTTCTCTA  
ATAAAAAGAGAAAATGATCGCATGCTGTAGTAGTGTCTATTTCTTGGGGGTTGGGTTGGGGCAGGACAGGAGGAGGATGGGAAGACATAGTAGCAGGATGCT  
GGGATGCGGTGGGCTTATGGCTTCTGAGCGGAAAGAACCACTGGGCTCGATACCTGACCTTAGCTAGAGCTTGGCGTAAATCATGGTATCATAGTCTTTCTGT  
GAAATTTGTTATCCGCTACAATTTCCACACAACATACGAGCCGGAAGCAATAAGTGTAAAGCCTAAGGTTAGGTTACTAATGAGTGTAGTAACTCAATAAATGCGTTCGCTACT  
GCCCGCTTTCAGTCCGGAACCTGTCGTCGCAAGCTGATTAATGAATCGGCCAACGCGGGGAGAGGCGGTTGCTGATTTGGGCGTCTTCCGCTTCTCCTCCTGAC  
TCGCTGCGCTCGGCTTCGGCTGGCGGAGCGGATCAGCTCACTCAAAGGCTTAATACGGTATCCACAGAATCAGGGGATAACCGAGGAAAGAACTGTGAGCAAAA  
GCCAGCAAAAGCCAGGAACTGTTAAAAGCCGCTTTCCTAAGGCTTCCGCCCCCTCAGGACATCACAAGACTGACGAGCATCAGCAAAAGTCAAGCTCAGAGTGGCCGAAA  
CCCGACAGGACTATAAAGATAACAGCGGCTTCCCTCGTGCCTCTCTCTGTCGACCTGCCGCTTACCGGATACCTGTCCGCTTCTCTCCCTTCGGA  
AGCGTGGCGCTTCTCATAGCTCAGCTGTAGGTATCTCAGTTCGTTGAGTGTGTTGCTGCTCAAGCTGGGCTGTGTGCACGAAACCCCGCTCAGCCCGACCGCTGCCCT  
TATCCGGTAACTATCTGCTTGTAGTCCAACCCGGTAAGACAGCACTTATCGCCACTGGCAGCAGCCTGTGTAACAGGATAGCAGAGCGAGGATAGTAGGCGGTGCTACAGA  
GTTCCTTGAAGTGGTGGCTTAACCTACGCTTACCTAGAAGAACAGTATTTGGTATCTGCGCTCTGCTGAGCCAGTACCTTCGAAAGGAGTACCTTCGAGTCTGTATCCG  
AAAACAACCCCGCTGGTGGTGGTGTGTTTTTTGTTTGAAGCAGCAGATTACCGCGAAGAAAAGGATCTCAAGAAGATCTTTGATCTTTTACGGGGTGTGACGCTC  
AGTGGAAACAAAACCTCAGTTAAGGGATTTTGGTTCATGAGATTATCAAAAAGGATCTTACCCTAGATCTTAAATTAATAAAGTGAAGTTTTTAAATCAATCTAAAGTATATA  
TGAGTAAACTGGTGTGACAGTTACCAATGCTTAACTCAGTGTAGGACCACTTATCTCAGCGATCTGTCTAATTTCTTATCCATAGTGTGCTGACTCCCGCTGTGTAGATAACT  
ACGATACGGAGGGCTTACCATTGCGCCAGTGCCTGCAATGACACCCGAGACAGCAGCTCACCGGCTCAGATTTATCAAGCAATAAACACCGCAGCGGAGGCGGAGC

GCAGAAGTGGTCCTGCAACTTTATCCGCTCCATCCAGTCTATTAATGTTGCGGGGAAGCTAGAGTAAGTAGTTCGCCAGTTAATAGTTTGCACCAAGCTTGTGTCATTGC  
TACAGGCATCGTGGTGTCCAGCTCGTGGTATGGCTTATTGAGTCCGCTTCCCAACGATCAAGCCGAGTTACATGATCCCCATGTTGTGCAAAAAAGCGGTTAGC  
TCCTTCGCTCCCTGGATTCCTGCGAAGTAAGTTGGCCGCGAGTTATCATCTTGTATGGCAGCATGCAATAAATCTCTTACCTATGGGACTTCCCGTAAAGTGGTCTTT  
CTGTGACTGTTGAGTACTCAACCAAGTCAATTTCTGAGAAATAGTGTATGCGGCGACCGAGTGTCTTGGCCCGCGTCAATACGGGATAATACCGCGCCACATAGCAGAACTTT  
AAAAGTGTTCATATTGAAAACGTTCTTCGGGGCGAAAACCTCAAGGATCTTACCCTGTTGAGATCCAGTTCGATGTAACCCACTCGTGCACCCAACTCCTCAGCA  
TCCTTTTACTTACCAGCGTTCCTGTTGAGCAAAAACAGGAAGGCAAAATGCCGCAAAAAGGGAATAAGGGCGACACGGAAATGTTGAATACTCATACTCTCTCTTTTC  
AATATATTTAAGCAGTTTATTCGAGGTATTTGTTCTATAGCGGATACATATTTGAATGTTATTAGAAAATAAACAATAAGGGTTCCCGCAGCATTTCCCGGAAAAGTGGC  
ACCTGACGTGACGGATCGGGAGATCGATCTCCCGATCCCTAGGGTGCAGCTCAGTACAATCTGCTCTGATGCCGATAGTTAAGCCAGTATCTGCTCCCTGCTTGTGTG  
TTGGAGTGCCTGAGTAGTGCAGGACAAAATTAAGTACACAAGGCAAGGCTTGAACGCAATTCGATGAAGAATCTGCTTAGGGTTAGGCGTTTTCGCGTGTCTCGG  
ATGTACGGGCCAGATATACGGTGTGACATGATTTATGACTAGTTATTAATAGTAAATCAATTACGGGGTCAATAGTTTCAAGCCATATATGGAGTTCCCGGTTACATAACT  
TACGGTAAATGGCCCGCTGGCTGACCGCCCAACGACCCCGCCCATTCGACGTCAATTAATGACGTATGTTCCCATAGTAAACGCAATAGGGACTTCCCATGACGTCAATGG  
GTGGAGTATTTACGGTAAACTGCCACTTGGCAGTACATCAAGTGTATCATATGCCAAGTACGCCCTTATTGACGTCAATGACGGTAAATGGCCCGCTGGCATTATGCC  
AGTACATAGCTTATGGGACTTCTCTAGTTGGCAGTACATCTACGTATAGTCAATCGTATTTACCATGGTGTGCGGTTTTGGCAGTACATCAATGGCCGTGTGATGGGTT  
TGACTCACGGGATTTCAAGTCTCACCCCATTCAGCTCAATGGAGTGTGTTTTGGCACCAAAATCAACGGGATCTCCAAAATGTCGTAACAACTCCGCCCATTGGAG  
CAAATGGCCGGTAGGCGTTACGGTGGAGGTTATATAAGCAGGATGGTTTTAGTGAACCGTCAGATCCCGTAGAGATTCGCCGGCCGCTAATACGACTCATAATGGAGA  
GCCGCCACC

**pCMV-PE2:**

ATGAACGGACACGGCAGCGAAGCGAGTTCGAGTACCAAGAAGAAGCGGAAAGTCGACAAGAAGTACAGCATCGGCTGGACATCGGCACCAACTCTGTGGCTGGGCG  
TGATCACCGACAGTACAAGGTGCCAGCAAGAAATCAAGGTGCTGGGCAACACCGACCGGCACAGCATCAAGAAGAACCTGATCGGAGCCTGCTGTTGACAGCGGCGA  
AACAGCCGAGGCCACCGGCTGAAGAGAACCGCAGAAAGATACACCAGAGCGGAAGAACCGGATCTGCTATCTGCAAGAGATCTTACAGAACGAGATGGCCAGGTGGAC  
GACAGCTTCTTCCACAGACTGGAAGATTCCTTCTGTTGGAAGGAGGTAAGAAGCAGCAGCGGCACCCCATCTTCGGCAACATCCGTGACAGGTTGGCTACCCAGGAACT  
ACCCACCATCTACCACCTGAGAAAGAACTGGTGACAGCCGACCCGACCTGCGGCTGATCTATCTGGCCCTGGCCACATGATCAAGTTCCGGGGCCACTTCT  
GATCGAGGGCAGCTGAACCCGACAACAGCGCAGCTGGACAAGCTGTTTATCCAGCTGGTGCAGACCTACAACCAGCTGTTCCGAGAAAACCCCATCAACGCCAGCGGCTG  
GAGCCAAAGGCTATCTGCTGCCAGACTGAGCAAGAGCAGAGCGGCTGGAAAATCTGATCGCCAGCTGCGCCGGCAGAGAAGAAGTGGCCTGTTCCGAAACCTGATTTGCC  
TGAGCTTGGCCGTGACCCCAACTTCAGAGCAACTTCGACCTGGCCGGAGTGCACCACTGCAGCTGACAGCAGGACCTACGACGACGACCTGGACAACCTGCTGGCCCA  
GATCGGCGACGACTAGCGCTGTTTCTGGCCCAAGAACTGTCAGAGGCTCTGAGGACCTCTGAGCTGAGCTGATGAGACTGAACACGAGATCCGCAACCCCTGAGC  
GCCTCTATGATCAAGAGATACGACGAGCACCACAGGACCTGACCTGCTGAAAGCTCTGCTGCGGCAGCAGCTGCTTGAAGTACAAGAGATTTTCTTCCAGCAGAGCA  
AGAAGGCTAGCCCGGTACATTCAGCGCGGAGCCAGCCAGGAAGATTTTACAAGTTCATCAAGCCCATCTGGAAGAAGTGGACGGCACCAGGAACTGCTGTAAGT  
GAACAGGATGAGGACTGCTGGCGAAGCAGCGACTTCGACAACGGCAGTACCCACAGTCCACTGCGGGAGAGCTGCAGCCATTTGCGGGCGAGGAAAGATTTTAC  
CCATCTGGAAGGACACCAGGAAGAATCGAGAAGATCCTGACCTCCCGTACTAGCTGGGCCCTTGGCCAGGGGAAACAGAGATTCGCTGGATGACCAAGAA  
AGAGCGAGAAACCATCACCCCTGAACTTCGAGGAAGTGGTGACAAGGGCGTTCGCCAGAGCTTCACTGAGCGGATGACCAACTTCGATAAGAACCAGCCCAAGCA  
GAAGTGCTGCCCAAGCAGCTGCTGTACGAGTACTTACCGTGTATAACGAGTGCAGCAAGTGAATAGCTGACCGAGGAAATGAGAAGACCCCGCTCTCTGAGCGG  
GAACAGGATGAGCCTGCTGGCGAAGCAGCGACTTCGACAACGGCAGTACCCACAGTCCACTGCGGGAGAGCTGCAGCCATTTGCGGGCGAGGAAAGATTTTAC  
CCATCTGGAAGGACACCAGGAAGAATCGAGAAGATCCTGACCTCCCGTACTAGCTGGGCCCTTGGCCAGGGGAAACAGAGATTCGCTGGATGACCAAGAA  
AGAGCGAGAAACCATCACCCCTGAACTTCGAGGAAGTGGTGACAAGGGCGTTCGCCAGAGCTTCACTGAGCGGATGACCAACTTCGATAAGAACCAGCCCAAGCA  
GAAGTGCCTGCCCAAGCAGCTGCTGTACGAGTACTTACCGTGTATAACGAGTGCAGCAAGTGAATAGCTGACCGAGGAAATGAGAAGACCCCGCTCTCTGAGCGG  
GAGCAGATAAAGGCCATCGTGAGCTGCTTCAAGACCAACCGGAGTGCAGCAAGTGAACAGTGAAGCAGTGAAGGAGGACTACTTCAAGAAATCGAGTCTGCTGCTGAA  
TCTCCGGCGTGAAGATCGTTCAACGCTCCTGGCCACTACCAGTCTGCTGAAATATCAAGGCAAGGACTTCTGGCAATGAGGAAAACAGGAGCACTTTGGAA  
AGATATCGTGTGACCTGACTGTTTGGAGCAGAGAGATGATCGAGGAACGGCTGAAACCTATGCCACCTGTTGACGACAAAAGTGAAGCAGTGAAGCGGCGG  
AGATACACCGGTGGGGCAGCTGAGCCGGAAGCTGATCAACGGCATCCGGGCAAGCAGCTGCGCAAGCAATCTGGATTTCTTGAAGTCCGACGCTCCCAACAGAA  
ACTTTCAGCTGATTCACGACGACGCTGACTTAAAGAGGACATCGAAAGCCAGTTCGAAAGCCAGTTCGCCAGGGGATAGCTGACAGCAGTGAACCTGCGCCG  
GACCCCGCATTAAGAAGGGCATCTTCGACAGAGTGAAGTGGTGGACGAGCTGTTGAAAGTGTGGGCGGCACAAGCCGAGAACATCGTATCGAAATGGCCAGAGAG  
AACCGAGCACCCAGAAGGGACAGAAGAACAGCCGCGAGAGAATGAAGCGGATCGAAGAGGGATCAAAGAGTGGGACCCAGATCTGAAAGAACACCCCTGGAAACA  
CCGACTGCGAAGACGAGAAGCTGTACTTACTTACCTGCGAATGGCGGGATGATGACGAGCAGGAACTGGACATCAACCGGCTGTCCGACTACGATGTGGACGCTAT  
CGTGCTCAGAGCTTCTGGAAGGACGACTCATTGACACAAGGGTGTGACCAAGAGGCGGAAACCGGGCAAGGCGCAACCTGAGGAGCTGCGTGAAGAAG  
ATGAAGAATCTGCGCGCAGCTGCTGAACGCCAAGCTGATTTACCCAGAGAAAGTTCGACAATCTGACCAAGGCGGAGAGAGGGCGCTGAGCGAACTGGATAAGGGCGGCT  
TCATCAAGAGACAGCTGGTGAAGAACCGGCGAGATCACAAAGCAGTGGCAGCAGATCTGGACTCCCGGATGAACACTAAGTAGCAGCAGAAATGACAAGCTGATCCGGGAAGT  
GAAAGTGTACCCCTGAAGTCAAGCTGGTGTCCGATTTCCGGAAGGATTTCCAGTTTTACAAGTGCAGGATCAACAATACCACCAGCCACGACGCTACCTGAAC  
GCCGTGCGGAAACCCCTGATCAAAAAGTACCTAAGCTGGAAGCGAGTTCGTGTACGGCGACTACAAGGTGTGAAAGAGCTGCTGGGGATCAACATGCGGAAAGAAGCA  
AAATCGCAAGGCTACCGCAAGTACTTCTTACAGCAACATCATGAATTTTTCAAGACCGAGATTACCTGGCCAACGGCGAGATCCGGAAGCGGCTCTGATCGAGAC  
AAACGGCGAAACCGGGAGATCGTGTGGGATAAGGGCCGGGATTTGGCCACCTGCGGAAAGTGTGAGCATGCCCAAGTGAATATCGTGAAGAAGACCGAGGTGCAGACA  
GGCGGCTTCAGCAAGAGTCTATCTGCCAAGAGGAACAGCGATAGCTGATCGCCAGAAGAAGGACTGGGACCTTAAGAAGTACGGCGGCTTCGACGCCCCACCGTGG  
CCATTTCTGTGCTGGTGGTGGAAAGGGCCAACTAAGCTGGAAGCGAGTTCGTGTACGGCGACTCAAGAGGACTGCTGGGGATCAACATGCGGAAAGAAGCA  
TCCCATCGACTTTCTGGAAGCAAGGGCTACAAGAAGTGAAGAAGGACCTGATCATCAAGCTGCCTAAGTACTCCTGTTGAGCTGGAAAACGGCCGGAAGAGAATGCTG  
GCCTTGGCCGGGAACTCGAGAAGGGAACGAACCTGGCCCTGCCTCCAAATATGTGAATTCCTGTACTTGCCAGCCACTATGAGAAGCTGAAGGGCTCCCGCGGATA  
ATGACGAAACAGCTGTTTGTGAACAGCAAGCACTACTGAGCAGATCATCGAGCAGTACGCGAGTTCCTCAAGAGAGTGTATCTGGCCAGCCTGATCTGGACAA  
AGTGCTGTCCGCTACAACAAGCACGGGATAAGCCATAGAGAGCAGCGGAGAATATCATCACTGTTTACCTGACCAATCTGGGAGCCCTGCCGCTTCAAGTAC  
TTTGACACCACATCGACCGAAGAGGTACACCAGCACAAGAGTGTGGAGCCACCCTGATCCACCAGAGCATACCAGGCTGTACGAGACCGGATCGACCTGCTC  
AGCTGGAGGTTACTTCGAGGATCTAGCGGAGGATCTCTGGCAGCGAGACACAGGAACAAGCGAGTACGCAACACAGAGAGCAGTGGCGGCAAGCGCGGCGACG  
ACCCATAAATAGAAGATGAGTATCGCTACATGAGACTCAAAGAGCAGATGTTTCTTCTAGGTCACATAGGCTGCTGATTTCTCAGGCTGGGCGGAAAACCGG  
GGCATGGACTGGCAGTTTCGGCAAGCTCCTCTGATCATACCTTGAAGCAACCTTACCCCGTGTCCATAAAAACAATACCCATTTGCAACAAGAGCCAGCTGGGGATCA  
AGCCCCACATACAGAGACTGTTGGACAGGGAATACCTGTTACCTGCCAGTCCCTTGGAAACAGCCCTGCTACCGGTTAAGAACCAGGGACTAATGATTATAGGCTGT  
CCAGGACTGAGAGAAAGTCAACAAGCGGGTGAAGACATCACCCACCGTGCACCACTTACAGCTTTGAGCTGAGCTCCACCGTCCACAGTGTACTGCTGCT  
GATTTAAAGGATGCTTTTTCTGCTGACTCCACCACAGTCCACCCTGTTTAAATGAGGCACTGCACAGAGACCTAGCAGACTTCCGGATCCAGCACCAGACTTGTATCTGCTACAGTACGTGGA  
GACTCCACAGGGTTTCAAAAACAGTCCACCCTGTTTAAATGAGGCACTGCACAGAGACCTAGCAGACTTCCGGATCCAGCACCAGACTTGTATCTGCTACAGTACGTGGA  
TGACTTACTGCTGGCCGCTACTTCTGACTAGACTGCCAACAGGATCACTGGGCTGTTACAACCCTAGGGAACCTCGGGCTTCGCGCCGCAAGAAAGCCCAAAAT  
TGGCAGAAACAGGTCAGTATCTGGGATCTTTCAAAAGAGGTCAGAGTGGTGTACTGAGGCGAGAAAGAGACTGTGATGGGGCAGCTACTCCGAGAGACCCCTCGAC  
AACTAAGGGATTTCTGAGGAAAGCGAGCTCTGTGCCTCTTTCATCCTGGGTGTCAGAAAATGGCAGGACCCCTGTTACCTCAACAAAACCGGGCACTGTTTTAATG  
GGGCCAGACCAAAAAGGCTATCAAGAAATCAAGCAAGCTCTTCAACTGCCCGACCCCTGGGGTGGCAGATTTGACTAAGCCCTTTGAATCTTTGTGCGAGAGAAG  
CAGGGCTACGCCAAAGGTGTCTTAACGCAAAAACCTGGGACTTGGCGCTGGCCCGGTTGCTTACTTCAAAAAGCTAGACCAGTGGGTGGCCCTTGGCTAC  
GGATGTAGCAGCCTTGGCTGACTGACAAAGGATGACGAGCAAGTAACTACCTGGGACGACCTGATCACTTGGCCCTTACGAGCTAGAGGCACTAGTCAAAACACCC  
CGACCGCTGGCTTTCCAAAGCCGATGACTCACTATCAGGCTTGTCTTGGACAGGAGCCGAGTCCAGTTGGAGGCTGTAGCCCTGAGCCCTGACCCGCTGCCA  
CTGCTGAGGAAGGGCTGCAACAACAACCTGCTTGTATCTTGGCCGAAGCCACGGAAACCGACCCGACTAACGGACCAGCCGCTCCAGAGCGCGACACCTGGTACA  
CGGATGGAAGCAGTCTCTTACAGAGGACAGCGTAAAGCGGGAGTGGCGTACCCAGCAGGATACTGGGCTAAAGGCTGACCCAGCCGCGGACATCCGCTCAGG  
GGCTGAATGATGACTCACCAGGCTAAAAGTGGCAGAAGGTAAGAAGCTAAATGTTATACTGATACCGCTTATGCTTTGTACTGCCATATCCATGGAGAATA  
TACAGAAGGCGTGGTGGCTCACATCAGAAGGCAAAAGAGATCAAAAATAAAGACAGATCTTGGCCCTACTAAAAGCCCTCTTTCTGCCCCAAAAGCTTAGCATATCCATT  
GTCAGGACATCAAAAGGGACACAGCGCGAGGCTAGAGGCAACCGGATGGTTCAGCAAGCGGCGGAAAGGAGGAAAGTCTAAAGCGGTATCATCACCATCACCATTGAGTT  
AGAAAAATCATACCTCTGGCCGCTCAAAAAGCAACCGCCAGCGGAGTAACTCGAGCCCAAGAAGAAAGGAAAGTCTAAAGCGGTATCATCACCATCACCATTGAGTT  
AAACCGCTGATCAGCTFCGACTGTGCTCTTACTAGTTGCCAGCCTACTGCTTTGGCCCTCCCGCTGCTTCTTGGCTGACCTGGAAGTGGCACTCCACTGCTTCTTA  
ATAAAATGAGAAAATGTCATCGCATTGCTGAGTAGGTTGCTTCTATTTGGGGGGTGGGGTGGGGCAGGACAGCAAGGGGAGGATTTGGGAAGACAAATAGCAGGCATGCT  
GGGGATGCGGTGGGCTCTATGGCTTCTGAGGCAGAAAGAACAGTGGGGCTCGATACCGTGCACCTTAGCTAGAGCTTGGCGTAATCATGTTGATAGCTGTTCTGTGT  
GAAATGTTATCCGCTCACAATTCACACAACATACGAGCCGGAAGCATAAAGTGAAGCCTAGGGTGCCTAATGAGTGAAGTAACTCAATTAATTTGCGTTGGCTTACT











CAAACATCATCAATGTATCTTATCATGTCTGGCTCTAGCTATCCGCCCCCTAACTCCGCCATCCCGCCCCCTAACTCCGCCAGTTCCGCCATTTCCGCCCATGGCTGAC  
TAATTTTTTTTTTATTTATGTCAGAGGCCGAGGCCCTCGGCCCTCTGAGCTATTCAGAAAGTAGTGAGGAGGCTTTTTGGAGGCCCTAGGGACGTACCCAATTCGCCCTATAGT  
GAGTCGTATTACGCGCTCACTGGCCGTCGTTTTACACGTCGTGACTGGGAAAACCTGGCGTTACCCAATTAATCGCCCTGCAGCACATCCCCCTTCCGCCAGCTGGC  
GTAATAGCGAAGAGGCCCGCACCGATCGCCCTCCCAACAGTTGCGCAGCTGAATGGCGAATGGGACGCGCCCTGTAGCGGCGCATTAAGCGCGCGGGTGTGGTGGTTAC  
GCCGAGCTGACCGCTACACTTCCAGCGCCCTAGCGCCCGCTCTCTTCGCTTTCTCTCCCTTCTCTCGCCACGTTCCGCCGGCTTTCCCGCTCAAGCTCTAAATCGGGGG  
CTCCCTTTAGGGTTCCGATTTAGTGTCTTACGGCACCTCGACCCCAAAAACTTGATTAGGGTGATGGTTCACGTAGTGGGCCATCGCCCTGATAGACGGTTTTTCGCCCTT  
TGACGTTGGGATCCAGCTTTTAATAGTGGACTCTTGTTCAAAACCTGGAACAACACTCAACCCTATCTCGGCTATCTTTTGGATTATAAGGGATTTTGGCGATTTCCGGC  
CTATTGGTTAAAAATGAGCTGATTTAACAAAAATTTAACGCGAATTTAACAAAAATTTAACGCTTACAATTTAGGTGGCACTTTTCGGGGAATGTGGCGGAACCCCTA  
TTTGTATTTTTCTAAATACATTAATATGTATCCGCTCATGAGACAATAACCTGATAAATGCTTCAATAATATGAAAAAGGAGAGATGAGTATTCAACATTTCCG  
TGTCGCCCTTATCCCTTTTTTGGCGCATTTTGCCTTCTGTTTTTGTCTACCCAGAAACGCTGGTGAAGTAAAAGATGCTGAAGATCAGTTGGGTGCACGAGTGGGTAC  
ATCGAACGGATCTCAACAGCGGTAAGATCCTTGAGAGTTTTTCGCCCGAAGAACGTTTTTCCAATGATGAGCACTTTTAAAGTCTGCTATGTGGCGCGGTATTTCCCGTA  
TTGACGCCGGCAAGAGCAACTCGGTCGCCGATACACTATTTCTCAGAATGACTTGGTTGAGTACTCACAGTACAGAAAAGCATCTTACGGATGGCATGACAGTAAGAGA  
ATTATGAGTGTGCCATAACCATGAGTGATAACACTGCGGCCAACTTACTTCTGACAAACGATCGGAGGACCGAAGGAGCTAACCGCTTTTTTGCACAACATGGGGATCAT  
GTAACCTGCCTTGATCGTTGGAAACCGGAGCTGAATGAAGCCATACCAACGACGAGCTGACACCAGTGCCTGTAGCAATGGCAACACGTTGCGCAAACTTTAACTG  
GCGAACCTTACTCTAGCTTCCCGGCAACAATTAATAGACTGGATGGAGGGGATAAAGTTGCAGGACCACTTCTGCGCTCGGCCCTTCCGCTGGCTGGTTTTATTGCTGA  
TAAATCTGGAGCCGGTGAGCGTGGGTCTCGCGGTATCATTTGCAGCACTGGGGCCAGATGGTAAAGCCCTCCCGTATCGTAGTTATCTACACGACGGGGAGTCAGGCAACTATG  
GATGAACGAAATAGACAGATCGCTGAGATAGGTGCCCTCACTGATTAAGCATTTGGTAACTGTGACAGCAAGTTTACTCATATATACTTTAGATTGATTTAAAACTTCATTTTT  
AATTTAAAGGATCTAGGTGAAGATCCTTTTTGATAAATCTCATGACCAAAAATCCCTTAACTGAGTTTTTCGTTCCACTGAGCGTCAGACCCCGTAGAAAAGATCAAAAGGATC  
TTCTTGAGATCCTTTTTTCTGCGGTAATCTGCTGCTTGCAAAACAAAAAACCCAGCTACCCAGCGGTGGTTTTGTTTTGCGGATCAAGAGCTACCAACTCTTTTTCCGAAG  
GTAAGTGGCTTACGAGAGCGCAGATACCAAACTGTTCTTCTAGTGTAGCCGTAGTTAGGCCACCACTTCAAGAACTCTGTAGCACCGCTACATACCTCGCTCTGCTAA  
TCCTGTTACCAGTGGCTGCTGCCAGTGGCGATAAGTCTGTCTTACCAGGTTGGACTCAAGACGATAGTTACCGGATAAGGCGCAGCGGTGGGGTGAACGGGGGGTTCGTG  
CACACAGCCAGCTTGGAGCGAACGACCTACCCGAACTGAGTACCTACAGCGTGAAGTATGAGAAAAGCGCCACGCTTCCGAAAGGAGAAAAGGCGGACAGGTATCCGGTA  
AGCGGCAGGGTCGGAACAGGAGAGCGCACGAGGGAGCTTCCAGGGGAAACGCTGGTATCTTTATAGTCTGTGGGTTTTCCGCCACTCTGACTTGAGCGTCGATTTTTGT  
GATGCTCGTCAGGGGGCGGAGCCTATGAAAAACGCGCAGCAACGCGCCCTTTTACGGTTCTTGGCCTTTTGTCTGCGCTTTTGTCTCATATTTCTTCTCTCGTTATCCCC  
TGATTTCTGTGATAAACCGTATTACCCTTTTGGAGTGAAGTGAATACCCTCGCCGACGCGAAGCAGCCGAGCGAGTCAAGTGAAGCGGGAAGCGGAAGAGCGCCAATA  
CGCAAAACCGCTTCCCGCGCGTTGGCCGATTCATTAATGACAGCTGGCACGACAGGTTTTCCGACTGGAAAAGCGGGCAGTGAGCGCAACGCAATTAATGTGAGTTAGCTCA  
CTCATTAGGCACCCAGGCTTTACACTTTATGCTTCCGGCTCGTATGTTGTGTGGAATTTGTGAGCGGATAACAATTTACACAGGAAACAGCTATGACCATGATTACGCCAA  
GCGCGCAATTAACCCCTACTAAAGGGAACAAAAGCTGGAGCTGCAAGCTTAATGTAGTCTTATGCAATACTCTGTAGTCTTGAACATGTTAACGATGAGTTAGCAACATG  
CCTTACAAGGAGAGAAAAGCACCGTGCATGCCGATTTGGTGAAGTAAAGTGGTACGATCGTGCCTTATTAGGAAGGCAACAGACGGGTCTGACATGGATTGGACGAACCC  
TGAATTTGCCGATTTGCAGAGATTTGATTTAAGTGCCTAGCTCGATACATAAACGGGCTCTCTGTTAGACCAGATCTGAGCCTGGGAGCTCTCTGGCTAACTAGGGAAC  
CCACTGCTTAAGCCTCAATAAAGCTTGCCTTGAGTGTCTCAAGTAGTGTGTGCCGCTCTGTTGTGTGACTCTGGTAACTAGAGATCCCTCAGACCTTTTAGTCACTGTGGA  
AAATCTCTAGCAGTGGCGCCGAAACAGGGACTTGAAGCGAAGGGGAAACAGAGGAGCTCTCTGACGCGAGGACTCGGCTTCTGTAAGCGCGCCAGCGCAAGAGGCGAGGGG  
CGCGACTGGTGTGACTACGCAAAAATTTGACTAGCGAGGCTAGAAGGAGAGATGGGTGCGAGAGCGTCAATTAAGCGGGGAGAATTAGATCGCGATGGGAAAAAA  
TTCCGGTTAAGGCCAGGGGAAAAGAAAAATATAAATTAATAATATAGTATGGGCAAGCAGGAGCTAGAACCATTAGGAGTAGCACCCACCAAGGCAAGAGAGAGTGGTGACAGAGAAAAAGAGCAGTGG  
CTGTAGACAAATACTGGGACAGCTACAACCATCCCTTACAGACAGGATCAGAAGAACTTAGATCATTATATAATACAGTAGCAACCCCTATTGTGTGATCAAGGATAGAG  
ATAAAAGACCAAGGAAGCTTTAGACAAGATAGAGGAAGAGCAAAAACAAAAGTAAAGACCACGACAGCAAGCGCCGCTGATCTTACAGCTGGAGGAGGAGATATGAGG  
GACAATTTGGAGAAGTGAATTATATAAATAAAGTAGTAAAAATTAACCATTAGGAGTAGCACCCACCAAGGCAAGAGAGAGTGGTGACAGAGAAAAAGAGCAGTGG  
GAATAGGAGCTTTGTTCTTGGGTTCTTGGGAGCAGCAGGAAGCACTATGGGCGCAGCGTCAATGACGCTGACGGTACAGGCCAGACAATTTATGCTGTTAGTATAGTGCAGCA  
GCAGAACAATTTGCTGAGGGCTATTGAGGCGCAACAGCATCTGTTGCAACTCACAGTCTGGGGCATCAAGCAGCTCCAGGCAAGAATCTTGGCTGTGAAAGATACCTAAAG  
GATCAACAGCTCTGGGGATTTGGGGTGTCTTGAAAACTCATTGCAACACTGCTGTGCCCTTGGAAATGCTAGTTGGAGTAATAAATCTCTGGAACAGATTTGGAATCACA  
CGACCTGGATGGAGTGGGACAGAGAAAATTAACAATTAACAAGCTTAATACACTCCCTTAATTTGAAGAATCGCAAAAACAGCAAGAAAAGAAATGAACAAGAAATTTATTGGAAT  
AGATAAATGGGCAAGTTTGTGGAATTTGGTTAAACA

U6 promoter  
sgRNA

**Supplementary Sequences 3.** Amino acid sequences of Maloney murine leukemia virus reverse transcriptase (M-MLV RT) variants used in this study.

PE1 M-MLV RT:

TLNIEDEYRLHETSKEPDVSLGSTWLSDFPQAWAETGGMGLAVRQAPLI I PLKATSTPVS I KQYPMSQEARLGI  
KPHIQRLLDQGILVPCQSPWNTPLL PVKKPGTNDYRPVQDLREVNKRVEDIHPTV PNPYNLLSGLPPSHQWYTV  
LDLKDAFFCLRLHPTSQPLFAFEWRDPEMGI SGQLTWTRLPQGFKN SPTLFD EALHRDLADFRIQH PDLILLQY  
VDDLLLAATSELDCQOGTRALLQTLGNLGYRASAKKAQICQKQVKYLGYLLKEGQRWLTEARKETVMGQPTPKT  
PRQLREFLGTAGFCRLWIPGFAEMAAPLYPLTKTGT LFNWGPDQOKAYQEIKQALLTAPALGLPDLTKPFELFV  
DEKQGYAKGVL TQKLG PWRPVAYLSKKLDPVAAGWPPCLRMVAAIAVLT KDAGKLTMGQPLVILAPHAVEALV  
KQPPDRWLSNARMTHYQALLLDTDRVQFGP VVALNPATLLPLPEEGLQHNCLDILAEAHGTRPDLTDQPLPDAD  
HTWYTDGSSLLQEGQRKAGAAVTTE TEVIWAKALPAGTSAQRAELIALTQALKMAEGKKNVYTDSRYAFATAH  
IHGEIYRRRGLLTSEGKEIKNKDEILALLKALFLPKRLS I IHCPGHQKGHSAEARGNRMADQAARKAAITETPD  
TSTLLIENSSP

M3 M-MLV RT (D200N, T330P, L603W) (see Baranauskas *et al.*<sup>23</sup>):

TLNIEDEYRLHETSKEPDVSLGSTWLSDFPQAWAETGGMGLAVRQAPLI I PLKATSTPVS I KQYPMSQEARLGI  
KPHIQRLLDQGILVPCQSPWNTPLL PVKKPGTNDYRPVQDLREVNKRVEDIHPTV PNPYNLLSGLPPSHQWYTV  
LDLKDAFFCLRLHPTSQPLFAFEWRDPEMGI SGQLTWTRLPQGFKN SPTLFD **N**EALHRDLADFRIQH PDLILLQY  
VDDLLLAATSELDCQOGTRALLQTLGNLGYRASAKKAQICQKQVKYLGYLLKEGQRWLTEARKETVMGQPTPKT  
PRQLREFLGTAGFCRLWIPGFAEMAAPLYPLTK **P**GT LFNWGPDQOKAYQEIKQALLTAPALGLPDLTKPFELFV  
DEKQGYAKGVL TQKLG PWRPVAYLSKKLDPVAAGWPPCLRMVAAIAVLT KDAGKLTMGQPLVILAPHAVEALV  
KQPPDRWLSNARMTHYQALLLDTDRVQFGP VVALNPATLLPLPEEGLQHNCLDILAEAHGTRPDLTDQPLPDAD  
HTWYTDGSSLLQEGQRKAGAAVTTE TEVIWAKALPAGTSAQRAELIALTQALKMAEGKKNVYTDSRYAFATAH  
IHGEIYRRRG **W**LTSEGKEIKNKDEILALLKALFLPKRLS I IHCPGHQKGHSAEARGNRMADQAARKAAITETPD  
TSTLLIENSSP

PE2 M-MLV RT (D200N, T306K, W313F, T330P, L603W):

TLNIEDEYRLHETSKEPDVSLGSTWLSDFPQAWAETGGMGLAVRQAPLI I PLKATSTPVS I KQYPMSQEARLGI  
KPHIQRLLDQGILVPCQSPWNTPLL PVKKPGTNDYRPVQDLREVNKRVEDIHPTV PNPYNLLSGLPPSHQWYTV  
LDLKDAFFCLRLHPTSQPLFAFEWRDPEMGI SGQLTWTRLPQGFKN SPTLFD **N**EALHRDLADFRIQH PDLILLQY  
VDDLLLAATSELDCQOGTRALLQTLGNLGYRASAKKAQICQKQVKYLGYLLKEGQRWLTEARKETVMGQPTPKT  
PRQLREFLGTAGFCRLWIPGFAEMAAPLYPLTK **P**GT LFNWGPDQOKAYQEIKQALLTAPALGLPDLTKPFELFV  
DEKQGYAKGVL TQKLG PWRPVAYLSKKLDPVAAGWPPCLRMVAAIAVLT KDAGKLTMGQPLVILAPHAVEALV  
KQPPDRWLSNARMTHYQALLLDTDRVQFGP VVALNPATLLPLPEEGLQHNCLDILAEAHGTRPDLTDQPLPDAD  
HTWYTDGSSLLQEGQRKAGAAVTTE TEVIWAKALPAGTSAQRAELIALTQALKMAEGKKNVYTDSRYAFATAH  
IHGEIYRRRG **W**LTSEGKEIKNKDEILALLKALFLPKRLS I IHCPGHQKGHSAEARGNRMADQAARKAAITETPD  
TSTLLIENSSP

M3-deadRT M-MLV RT:

TLNIEDEYRLHETSKEPDVSLGSTWLSDFPQAWAETGGMGLAVRQAPLI I PLKATSTPVS I KQYPMSQEARLGI  
KPHIQRLLDQGILVPCQSPWNTPLL PVK **L**PGTNDY **S**PVQDLREVNKRVEDIHPTV PNPYNLLSGLPPSHQWYTV  
LDLKDAFFCLRLHPTSQPLFAFEWRDPEMGI SGQLTWTRLPQGFKN SPTLFD **N**EALHRDLADFRIQH PDLILLQY  
VDDLLLAATSELDCQOGTRALLQTLGNLGYRASAKKAQICQKQVKYLGYLLKEGQRWLTEARKETVMGQPTPKT  
PRQLREFLGTAGFCRLWIPGFAEMAAPLYPLTK **P**GT LFNWGPDQOKAYQEIKQALLTAPALGLPDLTKPFELFV  
DEKQGYAKGVL TQKLG PWRPVAYLSKKLDPVAAGWPPCLRMVAAIAVLT KDAGKLTMGQPLVILAPHAVEALV  
KQPPDRWLSNARMTHYQALLLDTDRVQFGP VVALNPATLLPLPEEGLQHNCLDILAEAHGTRPDLTDQPLPDAD  
HTWYTDGSSLLQEGQRKAGAAVTTE TEVIWAKALPAGTSAQRAELIALTQALKMAEGKKNVYTDSRYAFATAH  
IHGEIYRRRG **W**LTSEGKEIKNKDEILALLKALFLPKRLS I IHCPGHQKGHSAEARGNRMADQAARKAAITETPD  
TSTLLIENSSP

**Supplementary Note 1.** FACS gating examples for GFP-positive cell sorting. Below are examples of original batch analysis files outlining the sorting strategy used for generating *HEXA* 1278+TATC and *HBB* E6V HEK293T cell lines. The image data was generated on a Sony LE-MA900 cytometer using Cell Sorter Software v. 3.0.5. Graphic 1 shows gating plots for cells that do not express GFP. Graphic 2 shows an example sort of P2A–GFP-expressing cells used for isolating the *HBB* E6V HEK293T cell lines. HEK293T cells were initially gated on population using FSC-A/BSC-A (Gate A), then sorted for singlets using FSC-A/FSC-H (Gate B). Live cells were sorted for by gating DAPI-negative cells (Gate C). Cells with GFP fluorescence levels that were above those of the negative-control cells were sorted for using EGFP as the fluorochrome (Gate D). Graphic 3 shows allele tables for HEK293T cells homozygous for the *HEXA* 1278+TATC mutation isolated using FACS after treatment with PE3. Graphic 4 shows allele tables for HEK293T cells homozygous for the *HBB* E6V mutation isolated using FACS after treatment with PE3. Allele tables were generated using CRISPResso2<sup>5</sup>.

1. HEK293T cells (GFP-negative):

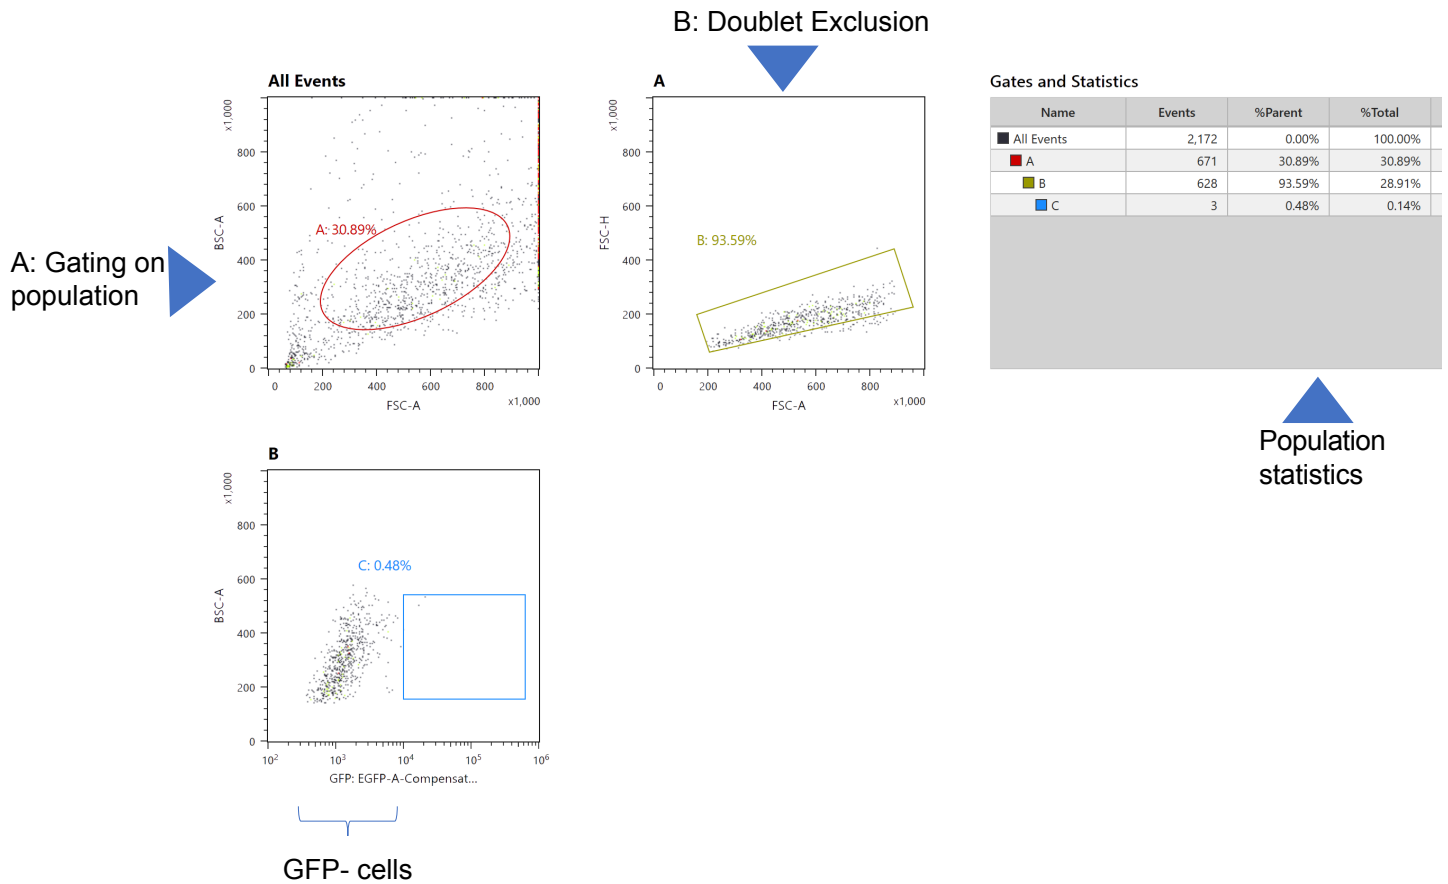

2. Representative plot of FACS gating for cells expressing PE2-P2A-GFP:

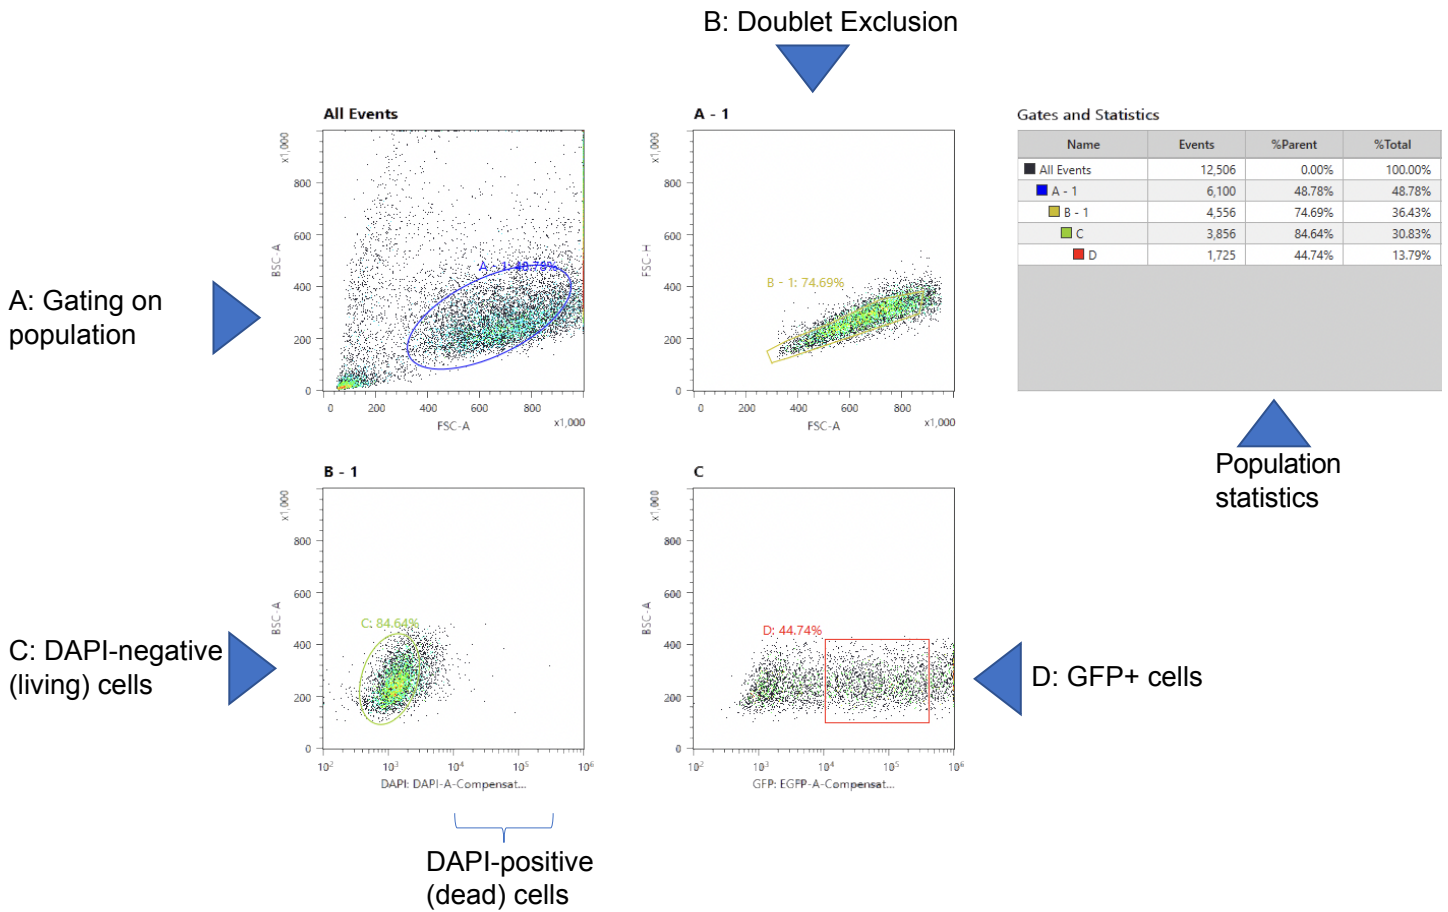

3. Genotypes for *HEXA* 1278+TATC homozygote HEK293T cells

Line 1

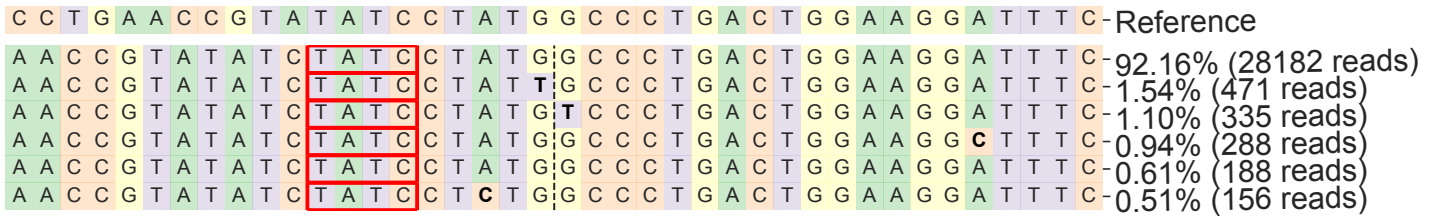

Line 2

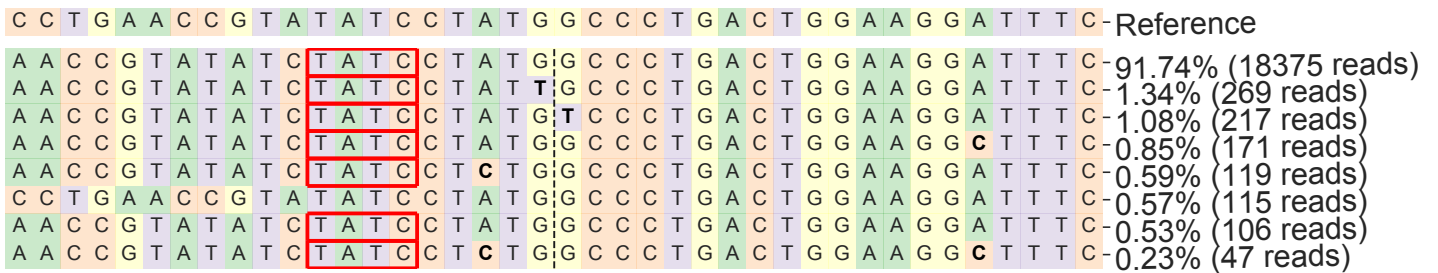

**bold** Substitutions  
  Insertions  
 - Deletions  
 ----- Predicted cleavage position



#### 4. Allele tables for *HBB* E6V homozygote HEK293T cell lines

##### Line 1

C A C C A T G G T G C A C C T G A C T C C T G A G G A G A A G T C T G C C G T T -Reference  
 C A C C A T G G T G C A C C T G A C T C C T G **T** G G A G A A G T C T G C C G T T -97.45% (87424 reads)  
 C A C C A T G G T G C A C C T G A C T C C T G A G G A G A A G T C T G C C G T T -0.27% (240 reads)  
 C A C C A T G G **C** G C A C C T G A C T C C T G **T** G G A G A A G T C T G C C G T T -0.24% (212 reads)

##### Line 2

C A C C A T G G T G C A C C T G A C T C C T G A G G A G A A G T C T G C C G T T -Reference  
 C A C C A T G G T G C A C C T G A C T C C T G **T** G G A G A A G T C T G C C G T T -97.16% (63793 reads)  
 C A C C A T G G T G C A C C T G A C T C C T G A G G A G A A G T C T G C C G T T -0.36% (239 reads)  
 C A C C A T G G **C** G C A C C T G A C T C C T G **T** G G A G A A G T C T G C C G T T -0.22% (142 reads)

##### Line 3

C A C C A T G G T G C A C C T G A C T C C T G A G G A G A A G T C T G C C G T T -Reference  
 C A C C A T G G T G C A C C T G A C T C C T G **T** G G A G A A G T C T G C C G T T -97.32% (77514 reads)  
 C A C C A T G G T G C A C C T G A C T C C T G A G G A G A A G T C T G C C G T T -0.29% (228 reads)  
 C A C C A T G G **C** G C A C C T G A C T C C T G **T** G G A G A A G T C T G C C G T T -0.22% (172 reads)  
 C A C C A T G G T G C A C C T G A C T C C T G **T** G G A G A A G T C T G **T** C G T T -0.21% (167 reads)

##### Line 4

C A C C A T G G T G C A C C T G A C T C C T G A G G A G A A G T C T G C C G T T -Reference  
 C A C C A T G G T G C A C C T G A C T C C T G **T** G G A G A A G T C T G C C G T T -96.94% (70061 reads)  
 C A C C A T G G T G C A C C T G A C T C C T G A G G A G A A G T C T G C C G T T -0.58% (419 reads)  
 C A C C A T G G **C** G C A C C T G A C T C C T G **T** G G A G A A G T C T G C C G T T -0.23% (165 reads)  
 C A C C A T G G T G C A C C T G A C T C C T G **T** G G A G A A G T C T G **T** C G T T -0.21% (150 reads)

##### Line 5

C A C C A T G G T G C A C C T G A C T C C T G A G G A G A A G T C T G C C G T T -Reference  
 C A C C A T G G T G C A C C T G A C T C C T G **T** G G A G A A G T C T G C C G T T -97.16% (54265 reads)  
 C A C C A T G G T G C A C C T G A C T C C T G A G G A G A A G T C T G C C G T T -0.33% (183 reads)  
 C A C C A T G G **C** G C A C C T G A C T C C T G **T** G G A G A A G T C T G C C G T T -0.21% (120 reads)  
 C A C C A T G G T G C A C C T G A C T C C T G **T** G G A G A A G T C T G **T** C G T T -0.20% (113 reads)

##### Line 6

C A C C A T G G T G C A C C T G A C T C C T G A G G A G A A G T C T G C C G T T -Reference  
 C A C C A T G G T G C A C C T G A C T C C T G **T** G G A G A A G T C T G C C G T T -97.35% (95642 reads)  
 C A C C A T G G T G C A C C T G A C T C C T G A G G A G A A G T C T G C C G T T -0.27% (267 reads)  
 C A C C A T G G **C** G C A C C T G A C T C C T G **T** G G A G A A G T C T G C C G T T -0.21% (211 reads)

**bold** Substitutions  
 Insertions  
 - Deletions  
 ----- Predicted cleavage position

**Supplementary Note 2.** Representative FACS gating for neuronal nuclei sorting. Nuclei were sequentially gated on the basis of DyeCycle Ruby signal, FSC/SSC ratio, SSC-Width/SSC-height ratio, and GFP/DyeCycle ratio, as shown below.

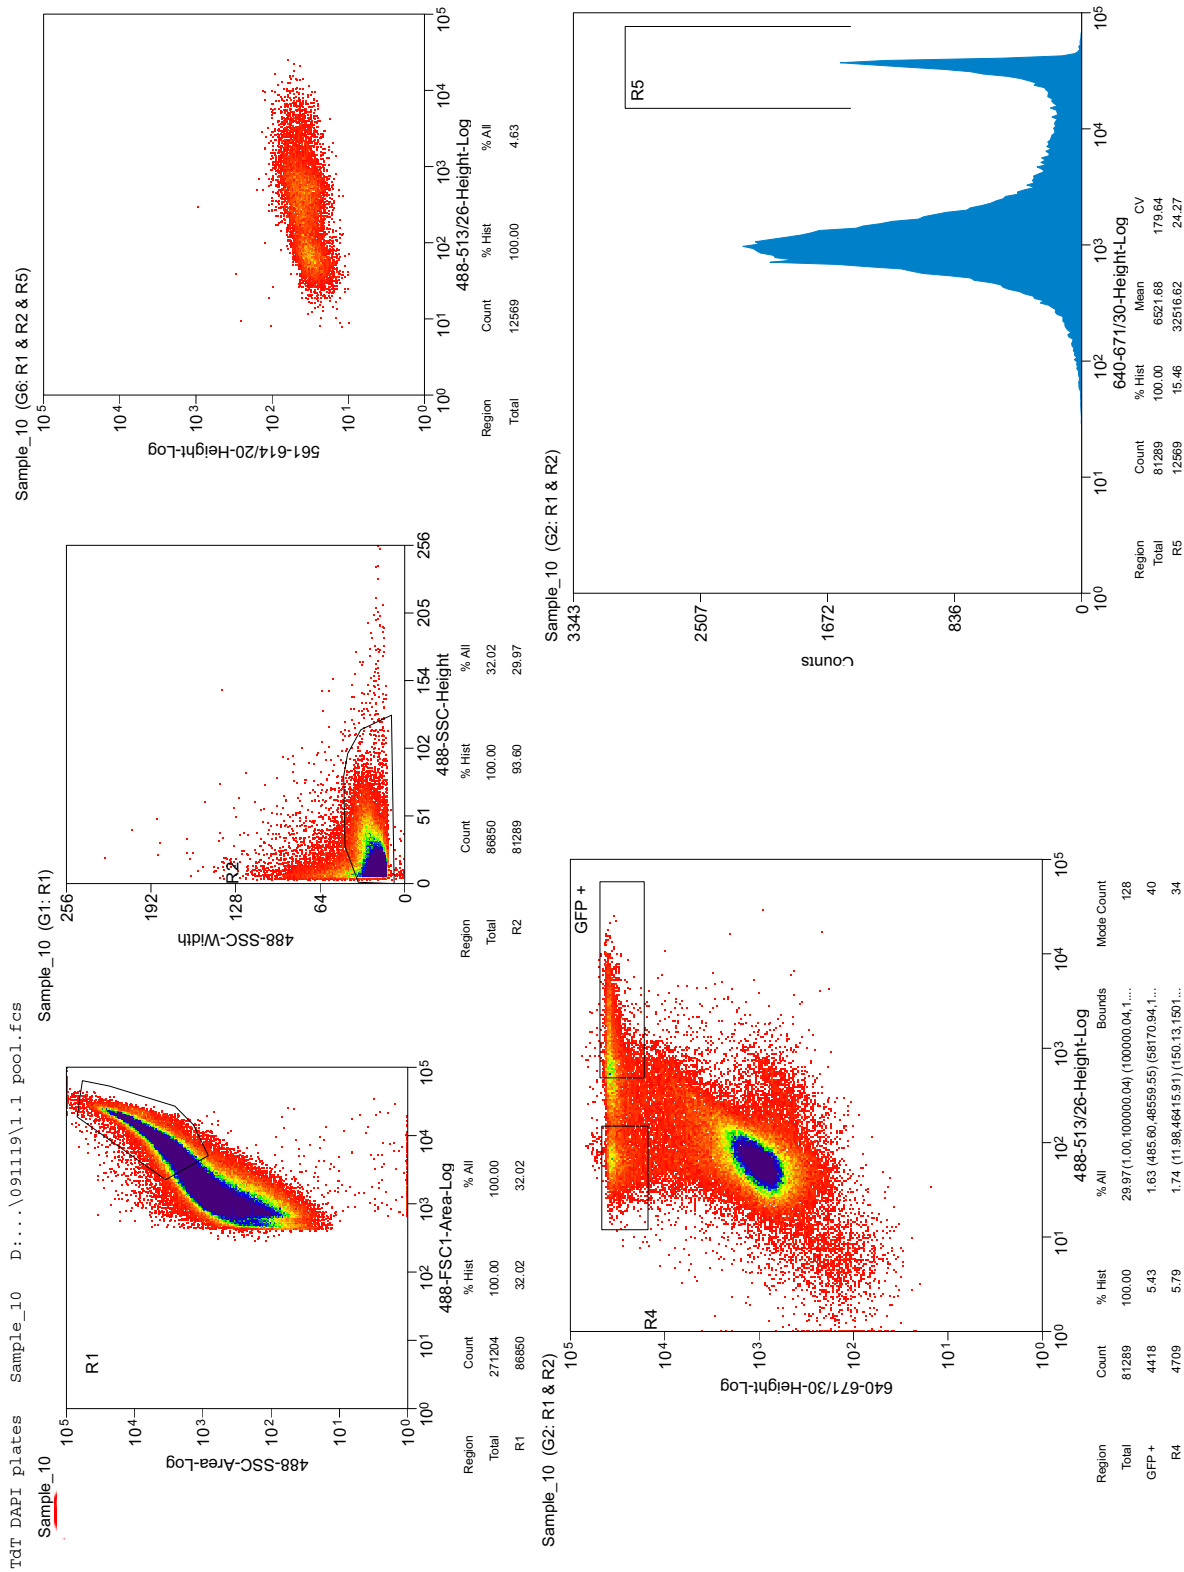

## Supplementary Note 3. Protocol for cloning 3'-extended pegRNAs into mammalian U6 expression vectors by Golden Gate assembly.

### Cloning overview

1. **Digest pU6-pegRNA-GG-Vector plasmid (component 1)** with *BsaI* and isolate the plasmid fragment (~2.2kb) containing the origin of replication, U6 promoter, U6 poly-T termination sequence, and Amp<sup>R</sup> gene
2. **Order oligonucleotides for:**
  - a. The desired spacer (target) sequence flanked by indicated overhangs (**component 2**)
    - i. Use the desired target's 5'-3' sequence for the top strand oligonucleotide (including the 5' CACC and 3' GTTTT overhangs) and use the reverse complement of the target sequence for the bottom strand oligonucleotide (including the 5' CTCTAAAAC overhang). Spacer sequences must begin with a G nucleotide for efficient transcription initiation.
  - b. The desired pegRNA 3' extension template flanked by the indicated overhangs (**component 3**)
    - i. Use the RNA sense sequence as the top strand oligonucleotide (featuring the 5' GTGC overhang) and use the reverse complement of this sequence for the bottom strand oligonucleotide (featuring the 5' AAAA overhang).
  - c. SpCas9 sgRNA scaffold sequence featuring compatible golden gate overhangs (**component 4**)
    - i. These oligonucleotides are not the complete scaffold sequence, as overhangs from the remaining components contribute several missing nucleotides
    - ii. Note: these oligonucleotides must be 5' phosphorylated. Oligonucleotides can be 5' phosphorylated by the manufacturer or 5' phosphorylated enzymatically using T4 PNK (see protocol below)
3. **Anneal top and bottom oligonucleotides** for components 2, 3, and 4 in separate annealing reactions according to the protocol below. If the SpCas9 sgRNA scaffold sequence (component 4) was not phosphorylated, phosphorylate with T4 PNK.
4. **Golden Gate assembly of isolated 2.2-kb fragment from component 1 with components 2, 3, and 4**
5. **Transform the ligation product into *E. coli***. The antibiotic resistance conferred by component 1 from the pU6-pegRNA-GG-vector plasmid is ampicillin and carbenicillin resistance.
6. **Isolate and sequence** plasmids from the resulting clonal transformants

### pegRNA cloning protocol

#### Step 1: Digest pU6-pegRNA-GG-Vector plasmid (component 1)

Combine the following in a PCR tube:

|                                            |            |
|--------------------------------------------|------------|
| 2000 ng pU6-pegRNA-GG-Vector (component 1) | X µL       |
| Bsa1-HFv2 (NEB)                            | 1.0 µL     |
| 10x Cutsmart Buffer                        | 3.0 µL     |
| H <sub>2</sub> O                           | to 30.0 µL |
| <hr/>                                      |            |
| Total reaction volume                      | 30.0 µL    |

Incubate at 37 °C for 4-16 hours

Isolate ~2.2-kb fragment from cut plasmid.

## Steps 2 and 3: Order and anneal oligonucleotide parts (components 2, 3, and 4)

### Materials

Annealing buffer: H<sub>2</sub>O supplemented with 10 mM Tris-Cl pH 8.5 and 50 mM NaCl  
Complementary oligonucleotide pairs

### Protocol

Combine the following in a PCR tube:

|                                           |              |
|-------------------------------------------|--------------|
| Top oligonucleotide, 100 $\mu$ M          | 1.0 $\mu$ L  |
| Bottom oligonucleotide, 100 $\mu$ M       | 1.0 $\mu$ L  |
| Annealing buffer (components 2, 3, and 4) | 23.0 $\mu$ L |

---

|                       |              |
|-----------------------|--------------|
| Total reaction volume | 25.0 $\mu$ L |
|-----------------------|--------------|

In thermocycler, heat at 95 °C for 3 minutes, then cool gradually (0.1 °C/s) to 22 °C

Dilute annealed oligonucleotides 1:4 by adding 75  $\mu$ L H<sub>2</sub>O. The final concentration of each oligonucleotide will be 1  $\mu$ M after this dilution. Do not dilute the sgRNA scaffold (component 4) if phosphorylating by PNK in step 2.5.

## Step 2.b.ii.: sgRNA scaffold phosphorylation (unnecessary if oligonucleotides were purchased phosphorylated)

### Protocol

Combine the following in a PCR tube:

|                                              |               |
|----------------------------------------------|---------------|
| 4 $\mu$ M oligonucleotide duplex from step 1 | 6.25 $\mu$ L  |
| 10x T4 DNA ligase buffer (NEB)               | 2.50 $\mu$ L  |
| T4 PNK (NEB)                                 | 0.50 $\mu$ L  |
| H <sub>2</sub> O                             | 15.75 $\mu$ L |

---

|                       |              |
|-----------------------|--------------|
| Total reaction volume | 20.0 $\mu$ L |
|-----------------------|--------------|

In thermocycler, incubate at 37 °C for 60 minutes

Following this phosphorylation, annealed scaffold oligonucleotides are now at a concentration of 1  $\mu$ M. Proceed to step 3.



#### Supplementary Note 4. Python script for quantifying pegRNA scaffold integration.

A custom python script was generated to characterize and quantify pegRNA insertions at target genomic loci.

The script iteratively matches text strings of increasing length taken from a reference sequence (guide RNA scaffold sequence) to the sequencing reads within fastq files, and counts the number of sequencing reads that match the search query. Each successive text string corresponds to an additional nucleotide of the guide RNA scaffold sequence. Exact length integrations and cumulative integrations up to a specified length were calculated in this manner. At the start of the reference sequence, 5 to 6 bases of the 3' end of the new DNA strand synthesized by the reverse transcriptase are included to ensure alignment and accurate counting of short slices of the sgRNA.

```
## sgRNA scaffold sequence search ##
```

```
import pandas as pd
import Bio as bio
from Bio import SeqIO
import glob
```

```
#generates list of fastq files to analyze
sources = glob.glob('*.fastq')
```

```
#reads the fastq files into a dictionary with the file names as keys
fastqdict = {}
for i in range(len(sources)):
    temp = list(SeqIO.parse(sources[i], "fastq"))
    fastqdict[sources[i]] = [str(temp[k].seq) for k in range(len(temp))]
```

```
#the referenced sequence to be searched for is entered into the following dictionary with
#an appropriate key
```

```
scaffdict =
{'HEK3':'CAGAGGACCGACTCGGTCCCACCTTTTTCAAGTTGATAACGGACTAGCCTTATTTTAACTT
GCTATTTCTAGCTCTAAACTCACGTGCTCAGTCTGGGCCGGTG',
'EMX1':'ATCACGCACCGACTCGGTGCCACTTTTTCAAGTTGATAACGGACTAGCCTTATTTTAACT
TGCTATTTCTAGCTCTAAACTTCTTCTTCTGCTCGGACTCGGTG',
'FANCF':'TTTCCGCACCGACTCGGTGCCACTTTTTCAAGTTGATAACGGACTAGCCTTATTTTAACT
TTGCTATTTCTAGCTCTAAACGGTGCTGCAGAAGGGATTCCGGTG',
'RN2':'TCGTTGCACCGACTCGGTGCCACTTTTTCAAGTTGATAACGGACTAGCCTTATTTTAACTT
GCTATTTCTAGCTCTAAACCGGTAATGACTAAGATGACGGTG'}
```

```
#matches and counts iterative slices of the reference string to the appropriate fastq files
#reference key must be contained in the name of the fastq file
#generated values represent cumulative counts for a minimum degree of sgRNA integration
#i.e. a given value x means x reads contain y or more bases of the scaffold
resultdict = dict.fromkeys(sources)
```

```
for key in fastqdict:
    for scaffold in scaffdict:
        if scaffold in str(key):
            resultlist = []
            for j in range(len(scaffdict[scaffold])):
```

```

extent = scaffdict[scaffold][0:(j+1)]
counter = 0
for i in range(len(fastqdict[key])):
    if extent in fastqdict[key][i]:
        counter = counter + 1
    resultlist.append(counter)
resultdict[key]=resultlist

```

```

#writes the results into a dataframe indexed from 1
resultdf = pd.DataFrame.from_dict(resultdict)
resultdf = resultdf.reindex(sorted(resultdf.columns), axis=1)
resultdf.index = range(1,len(resultdf)+1)

```

```

#converts the cumulative count values into specific counts
#i.e. a given value x means x reads contain exactly y bases of the scaffold
resultdf2=resultdf.copy()
for entry in resultdf:
    for i in range(1,len(resultdf[entry])+1):
        try:
            resultdf2[entry][i] = resultdf[entry][i]-resultdf[entry][i+1]
        except:
            resultdf2[entry][i] = resultdf[entry][i]

```

```

#converts the specific counts values into frequencies
resultdf3=resultdf2.copy()
for entry in resultdf3:
    resultdf3[entry]=resultdf2[entry].div(resultdf[entry][1])*100

```

```

#reads the results into excel files
resultdf.to_excel('cumulativecounts.xlsx')
resultdf2.to_excel('specificcounts.xlsx')
resultdf3.to_excel('specificfrequencies.xlsx')

```

Figure 1d

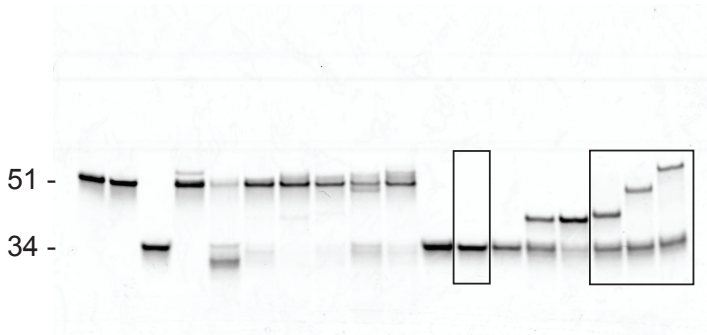

Figure 1d

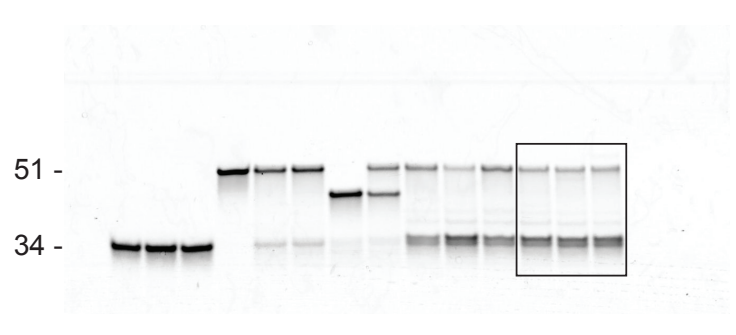

Figure 1e

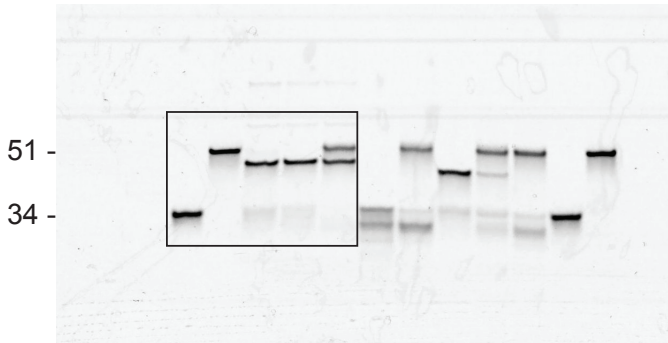

Extended Data Figure 1b

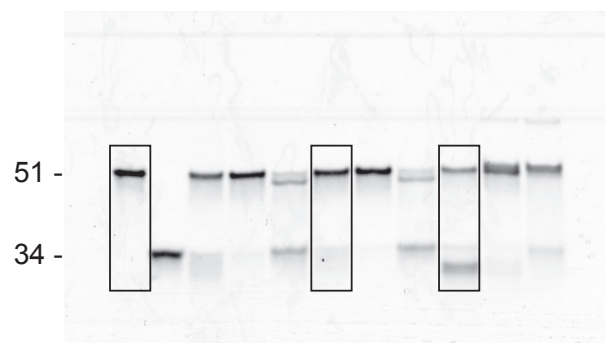

Extended Data Figure 1e

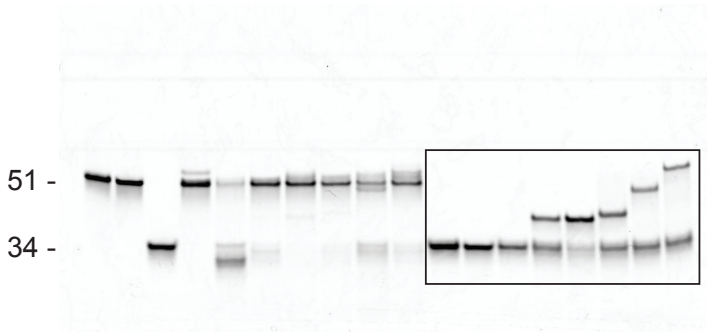

Extended Data Figure 1f

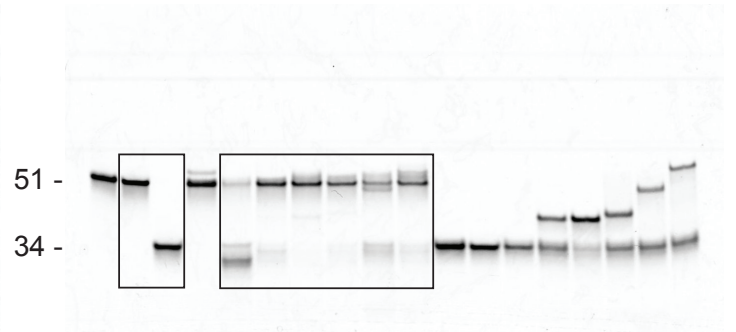

Extended Data Figure 1g

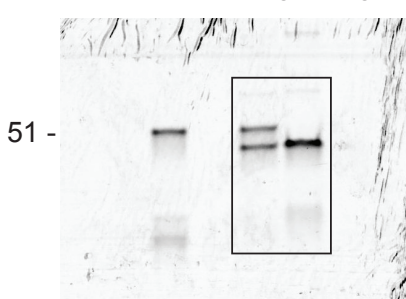

**Supplementary Figure 1.** Uncropped original gel electrophoresis data. Synthetic 5'-Cy5-labeled single-stranded DNA oligonucleotides were used as standards, labeled as 51 nt and 34 nt in the above denaturing PAGE images. The main-text figure or Extended Data figure that includes each image is shown above each gel, with a black outline to show the excerpted portion.



## Supplementary References

47. Yang, H. *et al.* One-Step Generation of Mice Carrying Reporter and Conditional Alleles by CRISPR/Cas-Mediated Genome Engineering. *Cell* **154**, 1370–1379 (2013).
48. Kim, S., Kim, D., Cho, S. W., Kim, J. & Kim, J.-S. Highly efficient RNA-guided genome editing in human cells via delivery of purified Cas9 ribonucleoproteins. *Genome Res.* **24**, 1012–1019 (2014).
49. Orlando, S. J. *et al.* Zinc-finger nuclease-driven targeted integration into mammalian genomes using donors with limited chromosomal homology. *Nucleic Acids Res.* **38**, e152–e152 (2010).
50. Suzuki, K. *et al.* *In vivo* genome editing via CRISPR/Cas9 mediated homology-independent targeted integration. *Nature* **540**, 144–149 (2016).
51. Maresca, M., Lin, V. G., Guo, N. & Yang, Y. Obligate ligation-gated recombination (ObLiGaRe): custom-designed nuclease-mediated targeted integration through nonhomologous end joining. *Genome Res.* **23**, 539–546 (2013).
52. Auer, T. O., Duroure, K., De Cian, A., Concordet, J.-P. & Del Bene, F. Highly efficient CRISPR/Cas9-mediated knock-in in zebrafish by homology-independent DNA repair. *Genome Res.* **24**, 142–153 (2014).
53. Jiang, F. & Doudna, J. A. CRISPR–Cas9 Structures and Mechanisms. *Annu. Rev. Biophys.* **46**, 505–529 (2017).
54. Hille, F. *et al.* The Biology of CRISPR-Cas: Backward and Forward. *Cell* **172**, 1239–1259 (2018).
55. Jinek, M. *et al.* Structures of Cas9 Endonucleases Reveal RNA-Mediated Conformational Activation. *Science* **343**, 1247997 (2014).
56. Jiang, F. *et al.* Structures of a CRISPR-Cas9 R-loop complex primed for DNA cleavage. *Science* aad8282 (2016). doi:10.1126/science.aad8282
57. Richardson, C. D., Ray, G. J., DeWitt, M. A., Curie, G. L. & Corn, J. E. Enhancing homology-directed genome editing by catalytically active and inactive CRISPR-Cas9 using asymmetric donor DNA. *Nat. Biotechnol.* **34**, 339–344 (2016).
58. Qi, L. S. *et al.* Repurposing CRISPR as an RNA-Guided Platform for Sequence-Specific Control of Gene Expression. *Cell* **152**, 1173–1183 (2013).
59. Shechner, D. M., Hacisuleyman, E., Younger, S. T. & Rinn, J. L. Multiplexable, locus-specific targeting of long RNAs with CRISPR-Display. *Nat. Methods* **12**, 664–670 (2015).
60. Tang, W., Hu, J. H. & Liu, D. R. Aptazyme-embedded guide RNAs enable ligand-responsive genome editing and transcriptional activation. *Nat. Commun.* **8**, 15939 (2017).
61. Jiang, F., Zhou, K., Ma, L., Gressel, S. & Doudna, J. A. A Cas9–guide RNA complex preorganized for target DNA recognition. *Science* **348**, 1477–1481 (2015).
62. Luan, D. D., Korman, M. H., Jakubczak, J. L. & Eickbush, T. H. Reverse transcription of R2Bm RNA is primed by a nick at the chromosomal target site: a mechanism for non-LTR retrotransposition. *Cell* **72**, 595–605 (1993).
63. Ingram, V. M. A specific chemical difference between the globins of normal human and sickle-cell anaemia haemoglobin. *Nature* **178**, 792–794 (1956).
64. Dever, D. P. *et al.* CRISPR/Cas9 Beta-globin Gene Targeting in Human Hematopoietic Stem Cells. *Nature* **539**, 384–389 (2016).
65. Park, S. H. *et al.* Highly efficient editing of the  $\beta$ -globin gene in patient-derived hematopoietic stem and progenitor cells to treat sickle cell disease. *Nucleic Acids Res.* doi:10.1093/nar/gkz475
66. Collinge, J. Prion diseases of humans and animals: their causes and molecular basis. *Annu. Rev. Neurosci.* **24**, 519–550 (2001).
